# Supplementary material for: A methylation platform of unconventional inert aryl electrophiles: trimethylboroxine as a universal methylating reagent
Source: Royal Society of Chemistry journal article supplement (doi:10.1039/d0sc01641a), 2020-01-01

## ***Supplementary Information***

# **Methylation Platform of Unconventional Inert Aryl Electrophiles: Trimethylboroxine as a Universal Methylating Reagent**

*Boya Feng, Yudong Yang\* and Jingsong You\**

Key Laboratory of Green Chemistry and Technology of Ministry of Education, College of  
Chemistry, Sichuan University, 29 Wangjiang Road, Chengdu 610064, PR China

E-mail: [jyou@scu.edu.cn](mailto:jyou@scu.edu.cn); [yangyudong@scu.edu.cn](mailto:yangyudong@scu.edu.cn)

## ***Table of Contents***

|       |                                                                                                         |     |
|-------|---------------------------------------------------------------------------------------------------------|-----|
| I.    | General remarks.....                                                                                    | S1  |
| II.   | Preparation of starting materials.....                                                                  | S1  |
|       | 2.1 Preparation of nitroaromatic substrates .....                                                       | S1  |
|       | 2.2 Preparation of amide substrates .....                                                               | S3  |
|       | 2.3 Preparation of benzoic phenyl ester substrates.....                                                 | S4  |
| III.  | Optimization of reaction conditions.....                                                                | S4  |
| IV.   | General procedures for palladium- or nickel-catalyzed methylation of unconventional electrophiles ..... | S9  |
| V.    | Characterization data of starting materials .....                                                       | S11 |
| VI.   | Characterization data of methylated products .....                                                      | S18 |
| VII.  | Sequential methylation of 1-fluoro-4-nitronaphthalene.....                                              | S34 |
| VIII. | Synthetic applications of catalytic methylation of unconventional aryl electrophiles.....               | S35 |
| IX.   | Mechanistic studies .....                                                                               | S38 |
|       | 8.1 General procedure for competition experiments .....                                                 | S38 |
|       | 8.2 Competition experiment for denitrative methylation.....                                             | S39 |
|       | 8.3 Competition experiment for decarbonylative methylation of amide .....                               | S42 |
|       | 8.4 Competition experiment for decarbonylative methylation of ester .....                               | S44 |
| X.    | References .....                                                                                        | S45 |
| XI.   | Copies of NMR spectra.....                                                                              | S47 |

## I. General remarks

NMR spectra were obtained on an Agilent 400-MR DD2 spectrometer. The  $^1\text{H}$  NMR (400 MHz) chemical shifts were measured relative to  $\text{CDCl}_3$  as the internal reference ( $\text{CDCl}_3$ :  $\delta = 7.26$ ). The  $^{13}\text{C}$  NMR (100 MHz) chemical shifts were given using  $\text{CDCl}_3$  as the internal standard ( $\text{CDCl}_3$ :  $\delta = 77.16$ ). High-resolution mass spectra (HRMS) were obtained with a Shimadzu LCMS-IT-TOF (ESI) or a Waters-Q-TOF-Premier (ESI). GC-MS spectra were recorded by Shimadzu GCMS-QP2010 SE. Infrared (IR) spectra were recorded on a Shimadzu IRTracer-100 FT-IR spectrophotometer.

Unless otherwise noted, all reagents were obtained from commercial suppliers and used without further purification. The solvents were purified and dried using Innovative Technology PS-MD-5 Solvent Purification System.  $\text{Pd}(\text{acac})_2$  were synthesized according to the literature procedures.<sup>1</sup>  $\text{PdCl}_2$  and  $\text{Pd}(\text{OAc})_2$  were purchased from Shanxi Kaida Chemical Engineering (China) CO., Ltd..  $[\text{Pd}(\text{allyl})\text{Cl}]_2$  was purchased from Alfa Aesar. BrettPhos were purchased from Adamas-beta Ltd.. Dcype were purchased from Sigma-Aldrich. Trimethylboroxine (TMB, 3.5N in THF), 4-dimethylaminopyridine (4-DMAP), DavePhos, XPhos, aryl carboxylic acids and acyl chlorides were purchased from Energy Chemical. The yields of compound **2f**, **2g** and **2h** were determined by GC analysis using calibration curves based on the data from authentic samples of the corresponding compounds. For all GC calibration curves, the ratio of molar concentration is taking as the horizontal axis and the ratio of GC area is taking as the vertical axis. Unless otherwise noted, all reactions were performed with dry solvents under an atmosphere of nitrogen in dried glassware with standard vacuum-line techniques.

## II. Preparation of starting materials

### 2.1 Preparation of nitroaromatic substrates

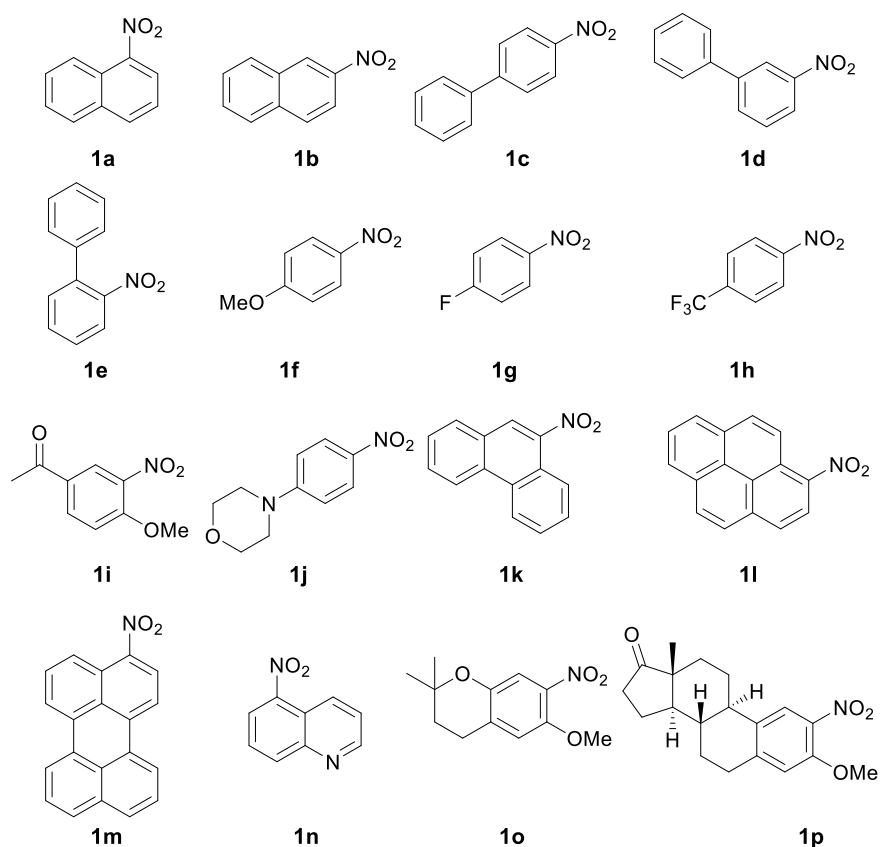

**Scheme S1.** Nitroaromatic substrates.

Compound **1a**, **1b**, **1f**, **1g**, **1h** and **1n** were purchased and used without further purification. Compound **1c**,<sup>2</sup> **1d**,<sup>2</sup> **1e**,<sup>2</sup> **1i**,<sup>3</sup> **1j**,<sup>4</sup> **1k**,<sup>5</sup> **1l**,<sup>6</sup> **1m**,<sup>7</sup> and **1p**<sup>8</sup> were prepared according to literature. The <sup>1</sup>H NMR and <sup>13</sup>C NMR data were in accordance with the related literature. Compound **1o** was prepared according to the follow procedure:

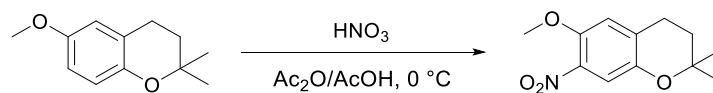

6-Methoxy-2,2-dimethyl-7-nitrochromane (**1o**) was prepared by the nitration of chromane derivative. A mixture of AcOH (1.5 mL), Ac<sub>2</sub>O (1.5 mL) and chromane derivative (770 mg, 4 mmol) was cooled in ice bath. HNO<sub>3</sub> (0.35 mL) was added dropwise and stirred at 0 °C for 1 h. Then aqueous NaOH (1 mol/L) was added to neutralize the solution. The mixture was sequentially extracted with ethyl acetate (20 mL) and washed with brine (20 mL). The organic layer was dried over Na<sub>2</sub>SO<sub>4</sub>, filtered and concentrated under reduced pressure. The resulting crude mixture was purified by column chromatography on silica gel (200-300 mesh, petroleum ether/ethyl acetate = 6/1) to afford the desired product as yellow oil (712 mg, 75% yield). <sup>1</sup>H NMR (400 MHz, CDCl<sub>3</sub>): δ = 1.36 (s, 6H), 1.86 (t, *J* = 6.8 Hz, 2H), 2.82 (t, *J* = 6.8 Hz, 2H), 3.78 (s, 3H), 6.87 (dt, *J* = 3.2, 1.2 Hz, 1H), 7.20 (d, *J* = 3.2 Hz, 1H) ppm. <sup>13</sup>C NMR (100 MHz, CDCl<sub>3</sub>) δ =



22.9, 26.8, 32.2, 56.1, 76.2, 107.8, 120.9, 125.4, 142.7, 151.3 ppm. HRMS (ESI<sup>+</sup>) calcd for C<sub>12</sub>H<sub>16</sub>NO<sub>4</sub> [M+H]<sup>+</sup> 238.1074, found 238.1075. IR (KBr): 2974, 2936, 2837, 1530, 1479, 1370, 1261, 1205, 1117, 1052, 924, 768 cm<sup>-1</sup>.

## 2.2 Preparation of amide substrates

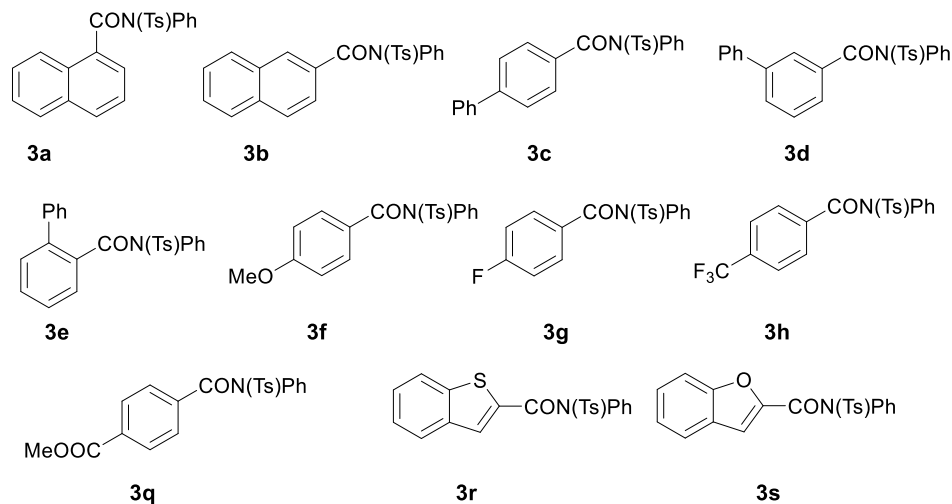

**Scheme S2.** Amide substrates.

**General procedure:** The amide substrates were prepared by a modified procedure according to the report.<sup>9</sup> The corresponding benzoyl chloride (5 mmol, 1.0 equiv) was added to a mixture of aniline (0.51 g, 5.5 mmol, 1.1 equiv), triethylamine (1.4 mL, 10 mmol, 2 equiv), 4-DMAP (31 mg, 0.25 mmol, 0.05 equiv) and DCM (10 mL) at 0 °C. The reaction mixture was stirred at room temperature overnight, and then diluted with DCM (25 mL). The mixture was washed with 1 N HCl (15 mL), saturated aqueous NaHCO<sub>3</sub> (15 mL), and brine (15 mL). Then the organic phase was dried over Na<sub>2</sub>SO<sub>4</sub>, filtered and concentrated under reduced pressure. The crude was recrystallized in ethanol. The resulting *NH*-free amide product (5 mmol) was dissolved in THF (25 mL). LiHMDS (1 mol/L in THF, 7.5 mL, 1.5 equiv) was added slowly at 0 °C. After stirring at 0 °C for 1 h, TsCl (1.14 g, 1.2 equiv) was added slowly. Then the reaction mixture was quenched by water after further stirring at room temperature for 15 h. The mixture was sequentially washed with 1 N HCl (15 mL), saturated aqueous NaHCO<sub>3</sub> (15 mL), and brine (15 mL). The organic layer was dried over Na<sub>2</sub>SO<sub>4</sub>, filtered and concentrated under reduced pressure. The resulting crude mixture was purified by column chromatography on silica gel (200-300 mesh) to afford the desired product.

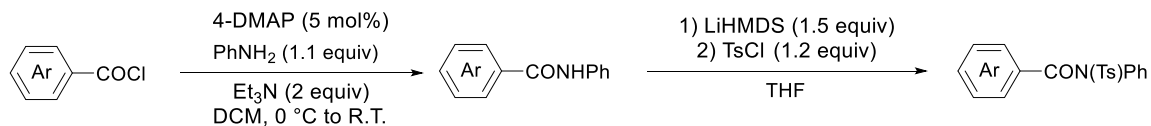

## 2.3 Preparation of benzoic phenyl ester substrates

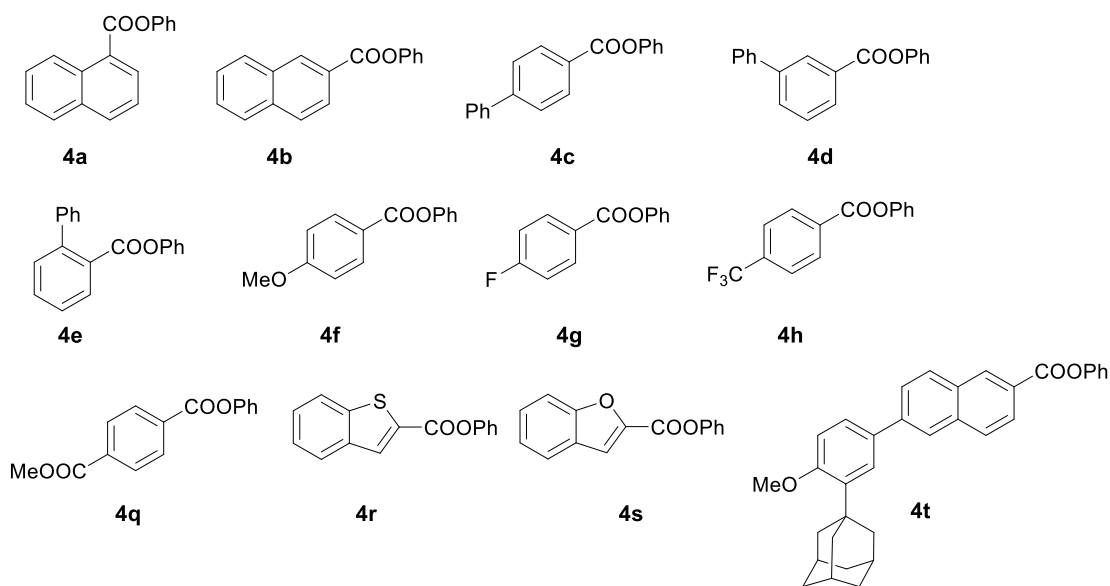

**Scheme S3.** Benzoic phenyl ester substrates.

**General procedure:** The corresponding benzoyl chloride (5 mmol, 1.0 equiv) was added to a mixture of phenol (0.51 g, 5.5 mmol, 1.1 equiv), triethylamine (1.4 mL, 10 mmol, 2 equiv), 4-DMAP (31 mg, 0.25 mmol, 0.05 equiv) and DCM (10 mL) at 0 °C. The reaction mixture was stirred at room temperature overnight, and then diluted with DCM (25 mL). The mixture was washed with 1 N HCl (15 mL), saturated aqueous NaHCO<sub>3</sub> (15 mL), and brine (15 mL). The organic phase was dried over Na<sub>2</sub>SO<sub>4</sub>, filtered and concentrated under reduced pressure. The product was further purified by recrystallization from ethanol.

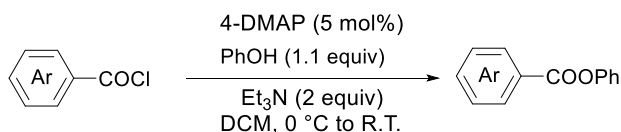

## III. Optimization of reaction conditions

### General procedure for reaction optimizations:

An oven-dried vial equipped with a stirring bar was charged with substrate **1a/3a/4a** (0.2 mmol, 1.0 equiv), TMB (100  $\mu$ L, 3.5N in THF, 3.5 mmol, 1.75 equiv), catalyst, ligand and base (0.4 mmol, 2 equiv) under N<sub>2</sub>. Solvent (0.6 mL) was added at room temperature. The reaction mixture was placed in a preheated oil bath at indicated temperature, and stirred for the indicated time. Next, the reaction mixture was cooled down to room temperature, diluted with CH<sub>2</sub>Cl<sub>2</sub> (10 mL), filtered through celite, and concentrated under reduced

pressure. Purification by column chromatography on silica gel (200-300 mesh, petroleum ether) afforded the product **2a**.

**Table S1.** Examination of protecting group on amide.<sup>a</sup>

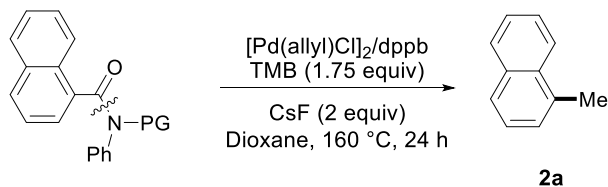

Protecting group:

|                      |      |      |       |     |      |      |
|----------------------|------|------|-------|-----|------|------|
|                      |      |      |       |     |      |      |
| Yield of <b>2a</b> : | n.d. | <10% | trace | 85% | n.d. | n.d. |

<sup>a</sup> Reaction conditions: amide (0.2 mmol, 1 equiv), TMB (100  $\mu$ L, 3.5N in THF, 3.5 mmol, 1.75 equiv), [Pd(allyl)Cl]<sub>2</sub> (5 mol%), dppb (20 mol%), CsF (2 equiv) in 1,4-dioxane (0.6 mL), 160  $^\circ$ C, 24 h. Isolated yields. dppb = 1,4-diphenyl phosphinobutane.

**Table S2.** Optimization of the reaction conditions for palladium-catalyzed decarbonylative methylation of amides.<sup>a</sup>

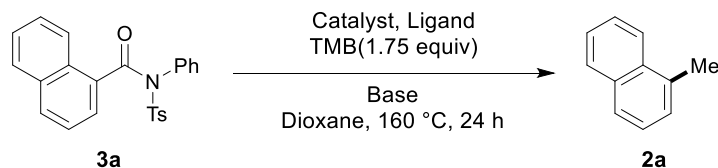

| Entry           | Catalyst (10 mol%)                    | Ligand (20 mol%) | Base (2 equiv)                  | Yield (%) <sup>b</sup> |
|-----------------|---------------------------------------|------------------|---------------------------------|------------------------|
| 1               | Pd(OAc) <sub>2</sub>                  | Xantphos         | CsF                             | 30                     |
| 2               | Pd(OAc) <sub>2</sub>                  | dppp             | CsF                             | 23                     |
| 3               | Pd(OAc) <sub>2</sub>                  | dppf             | CsF                             | 35                     |
| 4               | Pd(OAc) <sub>2</sub>                  | dcype            | CsF                             | 52                     |
| 5               | Pd(OAc) <sub>2</sub>                  | dppb             | CsF                             | 65                     |
| 6               | Pd(OAc) <sub>2</sub>                  | DPEPhos          | CsF                             | 60                     |
| 7               | Pd(OAc) <sub>2</sub>                  | IPr·HCl          | CsF                             | Trace                  |
| 8               | PdCl <sub>2</sub>                     | dppb             | CsF                             | 32                     |
| 9               | Pd(acac) <sub>2</sub>                 | dppb             | CsF                             | 42                     |
| 10              | Pd(en)(NO <sub>3</sub> ) <sub>2</sub> | dppb             | CsF                             | 40                     |
| 11              | Pd(COD)Cl <sub>2</sub>                | dppb             | CsF                             | 45                     |
| 12              | [Pd(allyl)Cl] <sub>2</sub> (5 mol%)   | dppb             | CsF                             | 85                     |
| 13              | [Pd(allyl)Cl] <sub>2</sub> (5 mol%)   | dppb             | Cs <sub>2</sub> CO <sub>3</sub> | <10                    |
| 14              | [Pd(allyl)Cl] <sub>2</sub> (5 mol%)   | dppb             | K <sub>3</sub> PO <sub>4</sub>  | 35                     |
| 15 <sup>c</sup> | [Pd(allyl)Cl] <sub>2</sub> (5 mol%)   | dppb             | CsF                             | 38                     |
| 16 <sup>d</sup> | [Pd(allyl)Cl] <sub>2</sub> (5 mol%)   | dppb             | CsF                             | 55                     |

<sup>a</sup> Reaction conditions: amide **3a** (0.2 mmol, 1 equiv), TMB (100  $\mu$ L, 3.5*N* in THF, 3.5 mmol, 1.75 equiv), catalyst (10 mol%), ligand (20 mol%), base (2 equiv), solvent (0.6 mL) at 160  $^{\circ}$ C, 24 h. <sup>b</sup> Isolated yield. <sup>c</sup> Toluene was used as solvent. <sup>d</sup> MeB(OH)<sub>2</sub> (5 equiv) was used instead of TMB. Xantphos = 4,5-bis(diphenylphosphino)-9,9-dimethylxanthene, dppb = 1,4-diphenyl phosphinobutane, dppp = 1,3-bis(diphenylphosphino)propane, dppf = 1,1'-bis(diphenylphosphino)ferrocene, dcype = 1,2-bis(dicyclohexylphosphino)ethane, DPEPhos = bis[(2-diphenylphosphino)phenyl] ether, IPr·HCl = 1,3-bis(2,6-diisopropylphenyl)imidazolium chloride, en = ethylenediamine, COD = 1,5-cyclooctadiene.

**Table S3.** Optimization of the reaction conditions for palladium-catalyzed decarbonylative methylation of benzoic phenyl esters.<sup>a</sup>

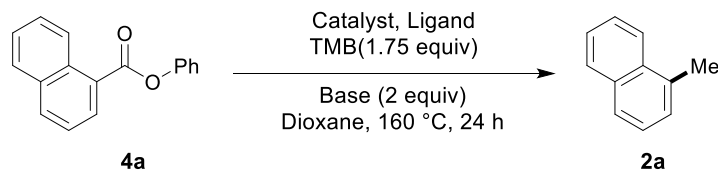

| Entry           | Catalyst (10 mol%)                          | Ligand (20 mol%)                     | Base                            | Yield(%) <sup>b</sup> |
|-----------------|---------------------------------------------|--------------------------------------|---------------------------------|-----------------------|
| 1               | Pd(OAc) <sub>2</sub>                        | DPEPhos                              | CsF                             | n.d.                  |
| 2               | [Pd(allyl)Cl] <sub>2</sub> (5 mol%)         | dppb                                 | CsF                             | n.d.                  |
| 3               | Pd(OAc) <sub>2</sub>                        | dcype                                | CsF                             | 72                    |
| 4               | Pd(OAc) <sub>2</sub> (5 mol%)               | dcype                                | CsF                             | 70                    |
| 5               | Pd(OAc) <sub>2</sub>                        | dcype                                | Cs <sub>2</sub> CO <sub>3</sub> | trace                 |
| 6 <sup>c</sup>  | Pd(OAc) <sub>2</sub>                        | dcype                                | CsF                             | 45                    |
| 7               | Ni(COD) <sub>2</sub>                        | dcype                                | CsF                             | 40                    |
| 8               | Ni(COD) <sub>2</sub>                        | <i>n</i> Bu <sub>3</sub> P (40 mol%) | CsF                             | 48                    |
| 9               | Pd(OAc) <sub>2</sub>                        | dppp                                 | CsF                             | n.d.                  |
| 10              | Pd(en)(NO <sub>3</sub> ) <sub>2</sub>       | dppb                                 | CsF                             | 40                    |
| 11              | PdCl <sub>2</sub>                           | dppb                                 | CsF                             | 45                    |
| 12              | Pd <sub>2</sub> (dba) <sub>3</sub> (5 mol%) | dppb                                 | CsF                             | 28                    |
| 13 <sup>c</sup> | Pd(OAc) <sub>2</sub> (5 mol%)               | dcype                                | CsF                             | 36                    |
| 14 <sup>d</sup> | Pd(OAc) <sub>2</sub>                        | dcype                                | CsF                             | trace                 |

<sup>a</sup> Reaction conditions: ester **4a** (0.2 mmol, 1 equiv), TMB (100  $\mu$ L, 3.5*N* in THF, 3.5 mmol, 1.75 equiv), catalyst (10 mol%), ligand (20 mol%), base (2 equiv), solvent (0.6 mL) at 160  $^\circ$ C, 24 h. <sup>b</sup> Isolated yield. <sup>c</sup> Toluene was used as solvent. <sup>d</sup> MeB(OH)<sub>2</sub> (5 equiv) was used instead of TMB. dppb = 1,4-diphenyl phosphinobutane, dppp = 1,3-bis(diphenylphosphino)propane, dcype = 1,2-bis(dicyclohexylphosphino)ethane, DPEPhos = bis[(2-diphenylphosphino)phenyl] ether, en = ethylenediamine, COD = 1,5-cyclooctadiene.

**Table S4.** Non-decarbonylative methylation of amide.<sup>a</sup>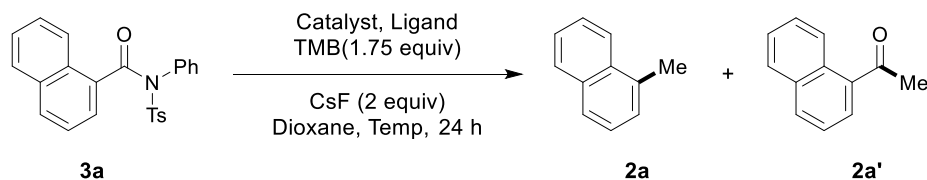

| Entry | Catalyst (10 mol%)         | Ligand (20 mol%) | Temp (°C) | Yield of <b>2a</b> (%) <sup>b</sup> | Yield of <b>2a'</b> (%) <sup>b</sup> |
|-------|----------------------------|------------------|-----------|-------------------------------------|--------------------------------------|
| 1     | [Pd(allyl)Cl] <sub>2</sub> | dppb             | 110       | 40                                  | 24                                   |
| 2     | [Pd(allyl)Cl] <sub>2</sub> | dppb             | 60        | n.d.                                | n.d.                                 |
| 3     | [Pd(allyl)Cl] <sub>2</sub> | PCy <sub>3</sub> | 60        | n.d.                                | 30                                   |
| 4     | Ni(COD) <sub>2</sub>       | PCy <sub>3</sub> | 60        | n.d.                                | n.d.                                 |
| 5     | Ni(COD) <sub>2</sub>       | SIPr·HCl/KOtBu   | 60        | 18                                  | n.d.                                 |

<sup>a</sup> Reaction conditions: amide **3a** (0.2 mmol, 1 equiv), TMB (100 μL, 3.5*N* in THF, 3.5 mmol, 1.75 equiv), catalyst (10 mol%), ligand (20 mol%), CsF (2 equiv), solvent (0.6 mL), 24 h. <sup>b</sup> Isolated yield. dppb = 1,4-diphenyl phosphinobutane, Cy = cyclohexyl, COD = 1,5-cyclooctadiene, SIPr = 1,3-bis(2,6-diisopropylphenyl)-4,5-dihydroimidazol-2-ylidene.

**Table S5.** Non-decarbonylative methylation of ester.<sup>a</sup>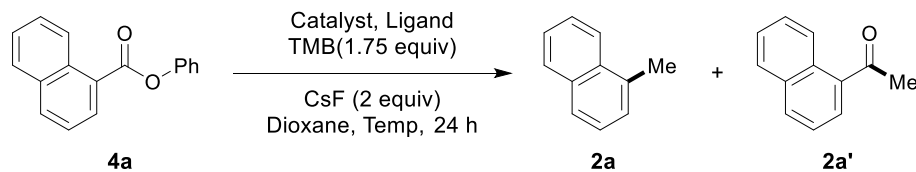

| Entry | Catalyst (10 mol%)   | Ligand (20 mol%) | Temp (°C) | Yield of <b>2a</b> (%) <sup>b</sup> | Yield of <b>2a'</b> (%) <sup>b</sup> |
|-------|----------------------|------------------|-----------|-------------------------------------|--------------------------------------|
| 1     | Pd(OAc) <sub>2</sub> | dcype            | 110       | 36                                  | <10                                  |
| 2     | Pd(OAc) <sub>2</sub> | dcype            | 60        | n.d.                                | n.d.                                 |
| 3     | Pd(OAc) <sub>2</sub> | PCy <sub>3</sub> | 60        | n.d.                                | 35                                   |
| 4     | Ni(COD) <sub>2</sub> | PCy <sub>3</sub> | 60        | n.d.                                | n.d.                                 |
| 5     | Ni(COD) <sub>2</sub> | SIPr·HCl/KOtBu   | 60        | n.d.                                | n.d.                                 |

<sup>a</sup> Reaction conditions: ester **4a** (0.2 mmol, 1 equiv), TMB (100 μL, 3.5*N* in THF, 3.5 mmol, 1.75 equiv), catalyst (10 mol%), ligand (20 mol%), base (2 equiv), solvent (0.6 mL) at 160 °C, 24 h. <sup>b</sup> Isolated yield. dcype = 1,2-bis(dicyclohexylphosphino)ethane, Cy = cyclohexyl, COD = 1,5-cyclooctadiene, SIPr = 1,3-bis(2,6-diisopropylphenyl)-4,5-dihydroimidazol-2-ylidene.

#### IV. General procedures for palladium- or nickel-catalyzed methylation of unconventional electrophiles

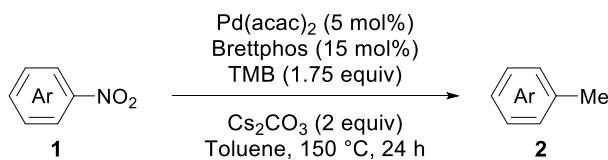

**Denitrative methylation of nitroarene 1:** An oven-dried vial equipped with a stirring bar was charged with nitroarene **1** (0.2 mmol, 1.0 equiv), TMB (100  $\mu$ L, 3.5*N* in THF, 3.5 mmol, 1.75 equiv), Pd(acac)<sub>2</sub> (3.1 mg, 5 mol%), BrettPhos (16.1 mg, 15 mol%), Cs<sub>2</sub>CO<sub>3</sub> (130 mg, 2 equiv) and toluene (0.6 mL) under N<sub>2</sub> at room temperature. The reaction mixture was placed in a preheated oil bath at 150 °C, and stirred for the indicated time. Then the reaction mixture was cooled down to room temperature, diluted with CH<sub>2</sub>Cl<sub>2</sub> (10 mL), filtered through celite, and concentrated under reduced pressure. Purification by column chromatography on silica gel (200-300 mesh) afforded the corresponding methylating product **2**.

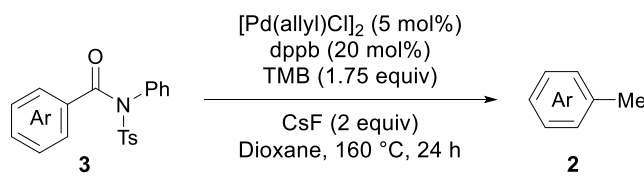

**Decarbonylative methylation of benzamide 3:** An oven-dried vial equipped with a stirring bar was charged with benzamide **3** (0.2 mmol, 1.0 equiv), TMB (100  $\mu$ L, 3.5*N* in THF, 3.5 mmol, 1.75 equiv), [Pd(allyl)Cl]<sub>2</sub> (3.9 mg, 5 mol%), dppb (17.1 mg, 20 mol%), CsF (61 mg, 2.0 equiv) and dioxane (0.6 mL) under N<sub>2</sub> at room temperature. The reaction mixture was placed in a preheated oil bath at 160 °C, and stirred for the indicated time. After the indicated time, the reaction mixture was cooled down to room temperature, diluted with CH<sub>2</sub>Cl<sub>2</sub> (10 mL), filtered through celite, and concentrated under reduced pressure. Purification by column chromatography on silica gel (200-300 mesh) afforded the corresponding methylating product **2**.

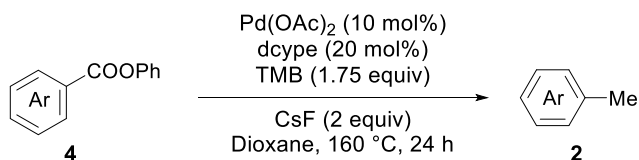

**Decarbonylative methylation of benzoic phenyl ester 4:** An oven-dried vial equipped with a stirring bar was charged with benzoic phenyl ester **4** (0.2 mmol, 1.0 equiv), TMB (100  $\mu$ L, 3.5*N* in THF, 3.5 mmol, 1.75 equiv), Pd(OAc)<sub>2</sub> (2.2 mg, 5 mol%), dcype (8.5 mg, 10 mol%), CsF (61mg, 2 equiv) and dioxane (0.6 mL) under N<sub>2</sub> at room temperature. The reaction mixture was placed in a preheated oil bath at 160 °C, and stirred for the indicated time. Then the reaction mixture was

cooled down to room temperature, diluted with CH<sub>2</sub>Cl<sub>2</sub> (10 mL), filtered through celite, and concentrated under reduced pressure. Purification by column chromatography on silica gel (200-300 mesh) afforded the corresponding methylating product **2**.

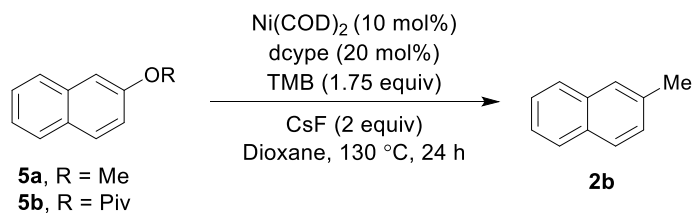

**Methylation of 1-naphthyl methyl ether 5a and 1-naphthyl pivalate 5b:** An oven-dried vial equipped with a stirring bar was charged with 1-naphthyl methyl ether **5a** or 1-naphthyl pivalate **5b** (0.2 mmol, 1.0 equiv), TMB (100  $\mu$ L, 3.5*N* in THF, 3.5 mmol, 1.75 equiv), Ni(COD)<sub>2</sub> (5.5 mg, 10 mol%), dcype (17 mg, 20 mol%), CsF (61mg, 2.0 equiv) and dioxane (0.6 mL) under N<sub>2</sub> at room temperature. The reaction mixture was placed in a preheated oil bath at 130 °C, and stirred for 24 h. The reaction mixture was then cooled down to room temperature, diluted with CH<sub>2</sub>Cl<sub>2</sub> (10 mL), filtered through celite, and concentrated. Purification by column chromatography on silica gel (200-300 mesh, petroleum ether) afforded 2-methylnaphthalene (**2b**) as colorless liquid (R = Me, 14 mg, 48% yield; R = Piv, 23 mg, 82% yield).

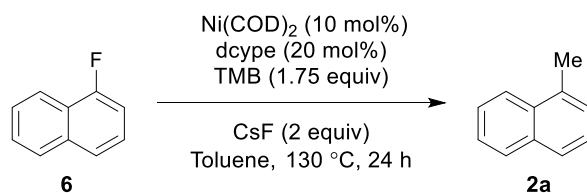

**Defluoromethylation of 1-fluoro naphthalene 6:** An oven-dried vial equipped with a stirring bar was charged with 1-fluoro naphthalene **6** (0.2 mmol, 1.0 equiv), TMB (100  $\mu$ L, 3.5*N* in THF, 3.5 mmol, 1.75 equiv), Ni(COD)<sub>2</sub> (5.5 mg, 10 mol%), dcype (17 mg, 20 mol%), CsF (61mg, 2.0 equiv) and toluene (0.6 mL) under N<sub>2</sub> at room temperature. The reaction mixture was placed in a preheated oil bath at 130 °C, and stirred for 24 h. The reaction mixture was then cooled down to room temperature, diluted with CH<sub>2</sub>Cl<sub>2</sub> (10 mL), filtered through celite, and concentrated. Purification by column chromatography on silica gel (200-300 mesh, petroleum ether) afforded 1-methylnaphthalene (**2a**) as colorless liquid (20 mg, 70% yield).

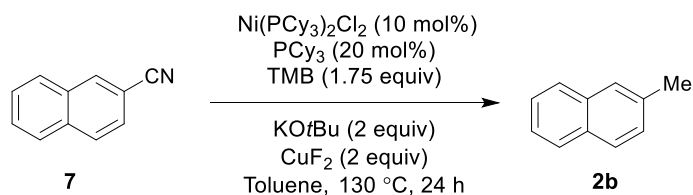



**Decyanative methylation of 2-naphthonitrile 7:** An oven-dried vial equipped with a stirring bar was charged with 2-naphthonitrile **7** (0.2 mmol, 1.0 equiv), TMB (100  $\mu$ L, 3.5*N* in THF, 3.5 mmol, 1.75 equiv), Ni(PCy<sub>3</sub>)Cl<sub>2</sub> (13.8 mg, 10 mol%), PCy<sub>3</sub> (11.2 mg, 20 mol%), KOtBu (45mg, 2.0 equiv), CuF<sub>2</sub> (40.6 mg, 2.0 equiv) and toluene (0.6 mL) under N<sub>2</sub> at room temperature. The reaction mixture was placed in a preheated oil bath at 130 °C, and stirred for 24 h. The reaction mixture was then cooled down to room temperature, diluted with CH<sub>2</sub>Cl<sub>2</sub> (10 mL), filtered through celite, and concentrated. Purification by column chromatography on silica gel (200-300 mesh) afforded 2-methylnaphthalene (**2b**) as colorless liquid (18 mg, 65% yield).

## V. Characterization data of starting materials

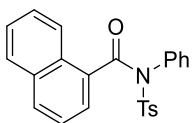

### **N-Phenyl-N-tosyl-1-naphthamide (3a)**

According to the general procedure for amide synthesis, **3a** was obtained as a white solid (petroleum ether/EtOAc = 8/1 to 4/1). <sup>1</sup>H NMR (400 MHz, CDCl<sub>3</sub>):  $\delta$  2.50 (s, 3H), 7.07 – 7.14 (m, 5H), 7.19 (t, *J* = 7.7 Hz, 1H), 7.34 (dd, *J* = 7.2, 1.2 Hz, 1H), 7.38 (d, *J* = 8.6 Hz, 2H), 7.41 – 7.50 (m, 2H), 7.67 – 7.72 (m, 2H), 7.89 (d, *J* = 8.4 Hz, 1H), 7.98 (d, *J* = 8.4 Hz, 2H) ppm. <sup>13</sup>C NMR (100 MHz, CDCl<sub>3</sub>)  $\delta$  21.9, 124.2, 124.6, 126.5, 126.7, 127.4, 128.4, 129.0, 129.2, 129.6, 130.0, 130.1, 130.8, 132.2, 133.2, 135.7, 136.8, 145.2, 169.9 ppm. HRMS (ESI<sup>+</sup>) calcd for C<sub>24</sub>H<sub>20</sub>NO<sub>3</sub>S [M+H]<sup>+</sup> 402.1158, found 402.1162. IR (KBr): 3063, 3026, 2921, 1688, 1486, 1363, 1279, 1172, 1075, 944, 757, 696 cm<sup>-1</sup>.

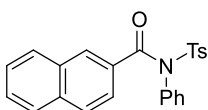

### **N-Phenyl-N-tosyl-2-naphthamide (3b)**

According to the general procedure for amide synthesis, **3b** was obtained as a white solid (petroleum ether/EtOAc = 8/1 to 4/1). <sup>1</sup>H NMR (400 MHz, CDCl<sub>3</sub>):  $\delta$  = 2.46 (s, 3H), 7.20 – 7.26 (m, 5H), 7.33 (d, *J* = 8.0 Hz, 2H), 7.41 – 7.52 (m, 3H), 7.60 (d, *J* = 8.8 Hz, 1H), 7.71 (d, *J* = 8.8 Hz, 2H), 7.85 (d, *J* = 8.4 Hz, 2H), 8.04 (s, 1H) ppm. <sup>13</sup>C NMR (100 MHz, CDCl<sub>3</sub>)  $\delta$  21.9, 125.2, 126.8, 127.8, 127.9, 128.4, 129.1, 129.2, 129.3, 129.4, 129.7, 130.5, 131.0, 131.4, 132.2, 134.6, 135.3, 137.6, 145.0, 170.1 ppm. HRMS (ESI<sup>+</sup>) calcd for C<sub>24</sub>H<sub>20</sub>NO<sub>3</sub>S [M+H]<sup>+</sup> 402.1158, found 402.1159. IR (KBr): 3113, 2930, 2852, 1697, 1608, 1585, 1531, 1520, 1347, 1252, 1106, 814, 771, 742 cm<sup>-1</sup>.

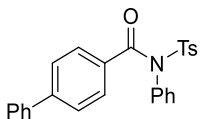

### **N-Phenyl-N-tosyl-(1,1'-biphenyl)-4-carboxamide (3c)**

According to the general procedure for amide synthesis, **3c** was obtained as a white solid (petroleum ether/EtOAc = 8/1 to 4/1).  $^1\text{H}$  NMR (400 MHz,  $\text{CDCl}_3$ ):  $\delta$  = 2.46 (s, 3H), 7.19 – 7.23 (m, 2H), 7.29 – 7.36 (m, 6H), 7.37 – 7.41 (m, 4H), 7.46 – 7.49 (m, 2H), 7.52 – 7.54 (m, 2H), 7.84 (d,  $J$  = 8.4 Hz, 2H) ppm.  $^{13}\text{C}$  NMR (100 MHz,  $\text{CDCl}_3$ ):  $\delta$  = 21.9, 126.7, 127.2, 128.3, 129.0, 129.2, 129.3, 129.4, 129.6, 130.3, 130.5, 132.3, 135.3, 137.6, 139.6, 144.5, 144.9, 169.8 ppm. HRMS ( $\text{ESI}^+$ ) calcd for  $\text{C}_{26}\text{H}_{22}\text{NO}_3\text{S}$  [ $\text{M}+\text{H}$ ] $^+$  428.1315, found 428.1324. IR (KBr): 3074, 2920, 2853, 1690, 1593, 1485, 1366, 1256, 1171, 1090, 745, 699  $\text{cm}^{-1}$ .

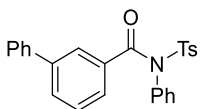

### **N-Phenyl-N-tosyl-(1,1'-biphenyl)-3-carboxamide (3d)**

According to the general procedure for amide synthesis, **3d** was obtained as a white solid (petroleum ether/EtOAc = 8/1 to 4/1).  $^1\text{H}$  NMR (400 MHz,  $\text{CDCl}_3$ ):  $\delta$  = 2.45 (s, 3H), 7.18 – 7.23 (m, 2H), 7.23 – 7.26 (m, 1H), 7.29 – 7.43 (m, 11H), 7.50 (ddd,  $J$  = 7.6, 2.0, 1.2 Hz, 1H), 7.66 (t,  $J$  = 1.6 Hz, 1H), 7.85 (d,  $J$  = 8.4 Hz, 2H) ppm.  $^{13}\text{C}$  NMR (100 MHz,  $\text{CDCl}_3$ ):  $\delta$  = 21.9, 127.1, 127.9, 128.39, 128.42, 128.6, 128.9, 129.28, 129.33, 129.4, 129.6, 130.5, 130.6, 134.2, 135.3, 137.6, 139.8, 141.1, 145.0, 169.9 ppm. HRMS ( $\text{ESI}^+$ ) calcd for  $\text{C}_{26}\text{H}_{22}\text{NO}_3\text{S}$  [ $\text{M}+\text{H}$ ] $^+$  428.1315, found 428.1314. IR (KBr): 3072, 2921, 2865, 1699, 1594, 1494, 1376, 1162, 1086, 947, 886, 701  $\text{cm}^{-1}$ .

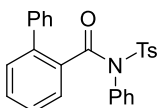

### **N-Phenyl-N-tosyl-(1,1'-biphenyl)-2-carboxamide (3e)**

According to the general procedure for amide synthesis, **3e** was obtained as a white solid (petroleum ether/EtOAc = 8/1 to 4/1).  $^1\text{H}$  NMR (400 MHz,  $\text{CDCl}_3$ ):  $\delta$  = 2.49 (s, 3H), 6.39 (d,  $J$  = 7.6 Hz, 2H), 7.03 (t,  $J$  = 7.6 Hz, 2H), 7.10 – 7.16 (m, 2H), 7.16 – 7.23 (m, 3H), 7.23 – 7.29 (m, 1H), 7.29 – 7.37 (m, 5H), 7.38 – 7.43 (m, 1H), 7.83 (d,  $J$  = 8.4 Hz, 2H) ppm.  $^{13}\text{C}$  NMR (100 MHz,  $\text{CDCl}_3$ ):  $\delta$  = 21.9, 126.9, 128.1, 128.3, 128.6, 128.9, 129.0, 129.4, 129.5, 129.7, 130.4, 130.6, 134.6, 135.2,

136.0, 138.5, 139.0, 144.9, 171.0 ppm. HRMS (ESI<sup>+</sup>) calcd for C<sub>26</sub>H<sub>22</sub>NO<sub>3</sub>S [M+H]<sup>+</sup> 428.1315, found 428.1325. IR (KBr): 3066, 2923, 2850, 1700, 1353, 1280, 1173, 1085, 958, 745, 692 cm<sup>-1</sup>.

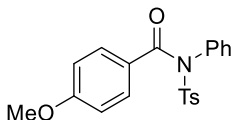

#### **N-Phenyl-N-tosyl-4-methoxy-1-benzamide (3f)**

According to the general procedure for amide synthesis, **3f** was obtained as a white solid (petroleum ether/EtOAc = 8/1 to 4/1). <sup>1</sup>H NMR (400 MHz, CDCl<sub>3</sub>): δ = 2.44 (s, 3H), 3.72 (s, 3H), 6.65 (d, *J* = 8.8 Hz, 2H), 7.16 – 7.19 (m, 2H), 7.28 – 7.30 (m, 5H), 7.47 (d, *J* = 8.8 Hz, 2H), 7.78 (d, *J* = 8.4 Hz, 2H) ppm. <sup>13</sup>C NMR (100 MHz, CDCl<sub>3</sub>): δ = 21.8, 55.4, 113.4, 125.5, 129.0, 129.2, 129.3, 129.6, 130.3, 132.2, 135.4, 138.0, 144.7, 162.5, 169.5 ppm. HRMS (ESI<sup>+</sup>) calcd for C<sub>21</sub>H<sub>20</sub>NO<sub>4</sub>S [M+H]<sup>+</sup> 382.1108, found 382.1109. The NMR spectra are in accordance with literature.<sup>10</sup>

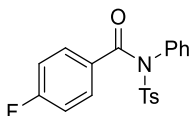

#### **4-Fluoro-N-phenyl-N-tosylbenzamide (3g)**

According to the general procedure for amide synthesis, **3g** was obtained as a white solid (petroleum ether/Ether = 4/1). <sup>1</sup>H NMR (400 MHz, CDCl<sub>3</sub>): δ = 2.45 (s, 3H), 6.82 – 6.89 (m, 2H), 7.12 – 7.17 (m, 2H), 7.27 – 7.35 (m, 5H), 7.45 – 7.50 (m, 2H), 7.78 – 7.83 (m, 2H) ppm. <sup>13</sup>C NMR (100 MHz, CDCl<sub>3</sub>): δ = 21.9, 115.43 (d, *J* = 22.1 Hz), 129.3, 129.38, 129.39, 129.6, 129.77 (d, *J* = 3.1 Hz), 130.4, 132.26 (d, *J* = 9.3 Hz), 135.1, 137.5, 145.1, 164.58 (d, *J* = 254.1 Hz), 168.9 ppm. <sup>19</sup>F NMR (376 MHz, CDCl<sub>3</sub>): δ = -105.96 ppm. HRMS (ESI<sup>+</sup>) calcd for C<sub>20</sub>H<sub>17</sub>FNO<sub>3</sub>S [M+H]<sup>+</sup> 370.0908, found 370.0913. The NMR spectra are in accordance with literature.<sup>10</sup>

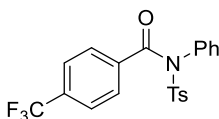

#### **N-Phenyl-N-tosyl-4-(trifluoromethyl)benzamide (3h)**

According to the general procedure for amide synthesis, **3h** was obtained as a white solid (petroleum ether/ether = 8/1 to 4/1). <sup>1</sup>H NMR (400 MHz, CDCl<sub>3</sub>): δ = 2.46 (s, 3H), 7.11 – 7.16 (m, 2H), 7.27 – 7.36 (m, 5H), 7.43 (d, *J* = 8.3 Hz, 2H), 7.52 (d, *J* = 8.2 Hz, 2H), 7.84 (d, *J* = 8.4 Hz, 2H)

ppm.  $^{13}\text{C}$  NMR (100 MHz,  $\text{CDCl}_3$ ):  $\delta$  = 21.9, 123.4 (q,  $J$  = 271.0 Hz), 125.2 (q,  $J$  = 3.7 Hz), 129.51, 129.53, 129.6, 129.7, 130.5, 133.1 (q,  $J$  = 32.8 Hz), 134.9, 136.9, 137.2 (q,  $J$  = 1.0 Hz), 145.4, 168.7 ppm.  $^{19}\text{F}$  NMR (376 MHz,  $\text{CDCl}_3$ ):  $\delta$  = -63.2 ppm. HRMS (ESI $^+$ ) calcd for  $\text{C}_{21}\text{H}_{16}\text{F}_3\text{NNaO}_3\text{S}$  [M+Na] $^+$  442.0695, found 442.0695. The NMR spectra are in accordance with literature.<sup>10</sup>

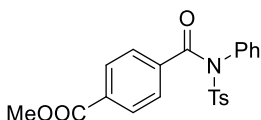

### Methyl 4-(phenyl(tosyl)carbamoyl)benzoate (3q)

According to the general procedure for amide synthesis, **3q** was obtained as a white solid (petroleum ether/EtOAc = 3/1 to 1/1).  $^1\text{H}$  NMR (400 MHz,  $\text{CDCl}_3$ ):  $\delta$  = 2.46 (s, 3H), 3.85 (s, 3H), 7.12 – 7.15 (m, 2H), 7.24 – 7.30 (m, 3H), 7.33 (d,  $J$  = 8.0 Hz, 2H), 7.45 – 7.48 (m, 2H), 7.80 – 7.87 (m, 4H) ppm.  $^{13}\text{C}$  NMR (100 MHz,  $\text{CDCl}_3$ ):  $\delta$  = 21.9, 52.5, 129.3, 129.4, 129.48, 129.50, 129.6, 130.5, 132.6, 135.0, 137.0, 137.9, 145.3, 166.1, 169.2 ppm. HRMS (ESI $^+$ ) calcd for  $\text{C}_{22}\text{H}_{20}\text{NO}_5\text{S}$  [M+H] $^+$  410.1057, found 410.1057. The NMR spectra are in accordance with literature.<sup>10</sup>

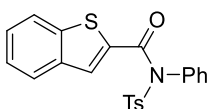

### N-Phenyl-N-tosylbenzo[b]thiophene-2-carboxamide (3r)

According to the general procedure for amide synthesis, **3r** was obtained as a white solid (petroleum ether/EtOAc = 8/1 to 4/1).  $^1\text{H}$  NMR (400 MHz,  $\text{CDCl}_3$ ):  $\delta$  = 2.46 (s, 3H), 7.19 (s, 1H), 7.29 (d,  $J$  = 8.0 Hz, 1H), 7.32 – 7.38 (m, 4H), 7.39 (s, 1H), 7.47 (t,  $J$  = 7.6 Hz, 2H), 7.52 (m, 1H), 7.60 (d,  $J$  = 8.0 Hz, 1H), 7.67 (d,  $J$  = 8.0 Hz, 1H), 7.91 (d,  $J$  = 8.4 Hz, 2H) ppm.  $^{13}\text{C}$  NMR (100 MHz,  $\text{CDCl}_3$ ):  $\delta$  = 21.9, 122.4, 124.9, 125.8, 127.3, 129.5, 129.7, 129.8, 130.4, 131.1, 132.2, 135.5, 136.2, 136.7, 138.1, 142.4, 145.2, 162.9 ppm. HRMS (ESI $^+$ ) calcd for  $\text{C}_{22}\text{H}_{18}\text{NO}_3\text{S}_2$  [M+H] $^+$  408.0723, found 408.0727. IR (KBr): 3093, 3067, 3033, 2929, 1661, 1508, 1367, 1189, 1178, 753, 701, 679  $\text{cm}^{-1}$ .

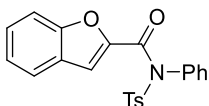

### N-Phenyl-N-tosylbenzofuran-2-carboxamide (3s)

According to the general procedure for amide synthesis, **3s** was obtained as a white solid (petroleum ether/EtOAc = 8/1 to 4/1).  $^1\text{H}$  NMR (400 MHz,  $\text{CDCl}_3$ ):  $\delta$  = 2.45 (s, 3H), 6.38 (s, 1H),

7.15 – 7.20 (m, 1H), 7.31 – 7.37 (m, 6H), 7.41 – 7.55 (m, 4H), 7.95 (d,  $J = 8.4$  Hz, 2H) ppm.  $^{13}\text{C}$  NMR (100 MHz,  $\text{CDCl}_3$ ):  $\delta = 21.9, 112.1, 115.6, 123.0, 123.9, 126.6, 128.1, 129.5, 129.7, 129.8, 130.3, 130.6, 135.4, 136.6, 145.3, 146.2, 155.1, 159.1$  ppm. HRMS (ESI $^+$ ) calcd for  $\text{C}_{22}\text{H}_{18}\text{NO}_4\text{S}$   $[\text{M}+\text{H}]^+$  392.0951, found 392.0956. IR (KBr): 3074, 3015, 2915, 1676, 1552, 1488, 1363, 1181, 1086, 1001, 938, 750, 701, 691  $\text{cm}^{-1}$ .

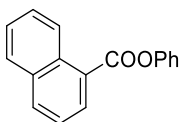

### Phenyl 1-naphthoate (4a)

According to the general procedure for ester synthesis, **4a** was obtained as a white solid.  $^1\text{H}$  NMR (400 MHz,  $\text{CDCl}_3$ ):  $\delta = 7.28 - 7.35$  (m, 3H), 7.49 (t,  $J = 7.9$  Hz, 2H), 7.55 – 7.62 (m, 2H), 7.63 – 7.68 (m, 1H), 7.94 (d,  $J = 8.0$  Hz, 1H), 8.12 (d,  $J = 8.2$  Hz, 1H), 8.49 (d,  $J = 7.3$  Hz, 1H), 9.05 (d,  $J = 8.7$  Hz, 1H) ppm.  $^{13}\text{C}$  NMR (100 MHz,  $\text{CDCl}_3$ )  $\delta = 122.0, 124.7, 125.9, 126.0, 126.1, 126.5, 128.3, 128.8, 129.7, 131.4, 131.8, 134.0, 134.5, 151.1, 166.0$  ppm. HRMS (ESI $^+$ ) calcd for  $\text{C}_{17}\text{H}_{12}\text{NaO}_2$   $[\text{M}+\text{Na}]^+$  271.0730, found 271.0734. The NMR spectra are in accordance with literature.<sup>11</sup>

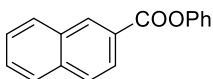

### Phenyl 2-naphthoate (4b)

According to the general procedure for ester synthesis, **4b** was obtained as a white solid.  $^1\text{H}$  NMR (400 MHz,  $\text{CDCl}_3$ ):  $\delta = 6.65$  (dd,  $J = 8.0$  Hz, 0.8 Hz, 1H), 7.18 – 7.20 (m, 2H), 7.24 – 7.29 (m, 1H) 7.40 – 7.44 (m, 5H), 7.59 – 7.61 (m, 2H), 7.89 (d,  $J = 16$  Hz, 1H) ppm.  $^{13}\text{C}$  NMR (100 MHz,  $\text{CDCl}_3$ ):  $\delta = 117.4, 121.8, 125.9, 128.4, 129.1, 129.6, 130.8, 134.3, 146.7, 150.9, 165.5$  ppm. HRMS (ESI $^+$ ) calcd for  $\text{C}_{17}\text{H}_{13}\text{O}_2$   $[\text{M}]^+$  248.0832, found 248.0827. The NMR spectra are in accordance with literature.<sup>11</sup>

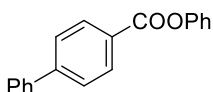

### Phenyl (1,1'-biphenyl)-4-carboxylate (4c)

According to the general procedure for ester synthesis, **4c** was obtained as a white solid.  $^1\text{H}$  NMR (400 MHz,  $\text{CDCl}_3$ ):  $\delta = 7.24 - 7.26$  (m, 2H), 7.27 – 7.31 (m, 1H), 7.41 – 7.52 (m, 5H), 7.66 – 7.68 (m, 2H), 7.75 (dd,  $J = 8.4, 1.5$  Hz, 2H), 8.29 (dd,  $J = 8.4, 1.6$  Hz, 2H) ppm.  $^{13}\text{C}$  NMR (100 MHz,  $\text{CDCl}_3$ ):  $\delta = 121.9, 126.0, 127.4, 127.5, 128.4, 128.5, 129.1, 129.6, 130.8, 140.0, 146.4, 151.1, 165.2$  ppm.

HRMS (ESI<sup>+</sup>) calcd for C<sub>19</sub>H<sub>14</sub>O<sub>2</sub> [M+Na]<sup>+</sup> 297.0886, found 297.0891. The NMR spectra are in accordance with literature.<sup>12</sup>

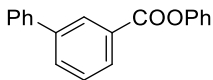

#### Phenyl (1,1'-biphenyl)-3-carboxylate (4d)

According to the general procedure for ester synthesis, **4d** was obtained as a white solid. <sup>1</sup>H NMR (400 MHz, CDCl<sub>3</sub>): δ = 7.24 (d, *J* = 8.8 Hz, 2H), 7.29 (t, *J* = 7.6 Hz, 1H), 7.38 – 7.51 (m, 5H), 7.60 (t, *J* = 7.6 Hz, 1H), 7.66 (d, *J* = 7.2 Hz, 2H), 7.87 (d, *J* = 7.6 Hz, 1H), 8.19 (d, *J* = 7.6 Hz, 1H), 8.44 (s, 1H) ppm. <sup>13</sup>C NMR (100 MHz, CDCl<sub>3</sub>): δ = 121.8, 126.1, 127.3, 128.0, 129.0, 129.07, 129.09, 129.2, 129.7, 130.2, 132.4, 140.1, 141.9, 151.1, 165.3 ppm. HRMS (ESI<sup>+</sup>) calcd for C<sub>19</sub>H<sub>14</sub>O<sub>2</sub> [M+Na]<sup>+</sup> 297.0886, found 297.0893. The NMR spectra are in accordance with literature.<sup>13</sup>

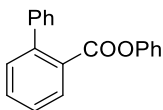

#### Phenyl (1,1'-biphenyl)-2-carboxylate (4e)

According to the general procedure for ester synthesis, **4e** was obtained as a white solid. <sup>1</sup>H NMR (400 MHz, CDCl<sub>3</sub>): δ = 6.85 (d, *J* = 7.6 Hz, 2H), 7.17 (t, *J* = 7.6 Hz, 1H), 7.31 (t, *J* = 8.0 Hz, 2H), 7.38 – 7.52 (m, 7H), 7.61 (t, *J* = 7.6 Hz, 1H), 8.00 (d, *J* = 8.0 Hz, 1H) ppm. <sup>13</sup>C NMR (100 MHz, CDCl<sub>3</sub>): δ = 121.4, 125.9, 127.5, 127.6, 128.4, 128.7, 129.4, 130.4, 130.6, 131.0, 131.9, 141.4, 142.9, 150.7, 167.4 ppm. HRMS (ESI<sup>+</sup>) calcd for C<sub>19</sub>H<sub>14</sub>O<sub>2</sub> [M+Na]<sup>+</sup> 297.0886, found 297.0890. The NMR spectra are in accordance with literature.<sup>14</sup>

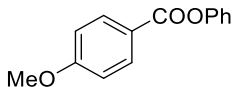

#### Phenyl 4-methoxybenzoate (4f)

According to the general procedure for ester synthesis, **4f** was obtained as a white solid. <sup>1</sup>H NMR (400 MHz, CDCl<sub>3</sub>): δ = 3.90 (s, 3H), 6.99 (d, *J* = 9.0 Hz, 2H), 7.19 – 7.23 (m, 2H), 7.22 – 7.32 (m, 1H), 7.40 – 7.46 (m, 2H), 8.17 (d, *J* = 9.0 Hz, 2H) ppm. <sup>13</sup>C NMR (100 MHz, CDCl<sub>3</sub>): δ = 55.6, 113.9, 121.9, 122.0, 125.9, 129.6, 132.4, 151.2, 164.0, 165.1 ppm. HRMS (ESI<sup>+</sup>) calcd for C<sub>14</sub>H<sub>13</sub>O<sub>3</sub> [M+H]<sup>+</sup> 229.0859, found 229.0860. The NMR spectra are in accordance with literature.<sup>11</sup>

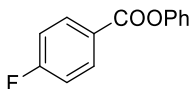

#### Phenyl 4-fluorobenzoate (4g)

According to the general procedure for ester synthesis, **4g** was obtained as a white solid.  $^1\text{H}$  NMR (400 MHz,  $\text{CDCl}_3$ ):  $\delta$  = 7.15 – 7.24 (m, 4H), 7.26 – 7.32 (m, 1H), 7.39 – 7.48 (m, 2H), 8.18 – 8.28 (m, 2H) ppm.  $^{13}\text{C}$  NMR (100 MHz,  $\text{CDCl}_3$ ):  $\delta$  = 115.92 (d,  $J$  = 22.0 Hz), 121.8, 125.89 (d,  $J$  = 2.9 Hz), 126.1, 129.7, 132.92 (d,  $J$  = 9.5 Hz), 150.9, 164.68 (d,  $J$  = 63.2 Hz), 167.5 ppm.  $^{19}\text{F}$  NMR (376 MHz,  $\text{CDCl}_3$ ):  $\delta$  = -104.46 ppm. HRMS (ESI $^+$ ) calcd for  $\text{C}_{13}\text{H}_9\text{FNaO}_2$   $[\text{M}+\text{Na}]^+$  239.0479, found 239.0484. The NMR spectra are in accordance with literature.<sup>11</sup>

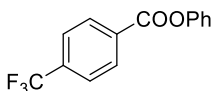

#### Phenyl 4-(trifluoromethyl)benzoate (4h)

According to the general procedure for ester synthesis, **4h** was obtained as a white solid.  $^1\text{H}$  NMR (400 MHz,  $\text{CDCl}_3$ ):  $\delta$  = 7.20 – 7.25 (m, 2H), 7.28 – 7.34 (m, 1H), 7.41 – 7.50 (m, 2H), 7.79 (d,  $J$  = 8.4 Hz, 2H), 8.33 (d,  $J$  = 8.4 Hz, 2H) ppm.  $^{13}\text{C}$  NMR (100 MHz,  $\text{CDCl}_3$ ):  $\delta$  = 121.7, 123.70 (q,  $J$  = 272.7 Hz), 125.75 (q,  $J$  = 3.7 Hz), 126.4, 129.8, 130.7, 132.95 (q,  $J$  = 1.2 Hz), 135.14 (q,  $J$  = 32.8 Hz), 150.8, 164.1 ppm.  $^{19}\text{F}$  NMR (376 MHz,  $\text{CDCl}_3$ ):  $\delta$  = -63.16 ppm. HRMS (ESI $^+$ ) calcd for  $\text{C}_{14}\text{H}_9\text{F}_3\text{NaO}_2$   $[\text{M}+\text{Na}]^+$  289.0447, found 289.0453. The NMR spectra are in accordance with literature.<sup>14</sup>

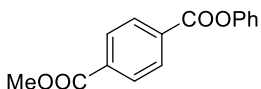

#### Methyl phenyl terephthalate (4q)

According to the general procedure for ester synthesis, **4q** was obtained as a white solid.  $^1\text{H}$  NMR (400 MHz,  $\text{CDCl}_3$ ):  $\delta$  = 3.97 (s, 3H), 7.21 – 7.24 (m, 2H), 7.28 – 7.32 (m, 1H), 7.42 – 7.47 (m, 2H), 8.16 – 8.19 (m, 2H), 8.26 – 8.29 (m, 2H) ppm.  $^{13}\text{C}$  NMR (100 MHz,  $\text{CDCl}_3$ ):  $\delta$  = 52.7, 121.7, 126.3, 129.7, 129.8, 130.3, 133.4, 134.6, 150.8, 164.5, 166.3 ppm. HRMS (ESI $^+$ ) calcd for  $\text{C}_{15}\text{H}_{12}\text{NaO}_4$   $[\text{M}+\text{Na}]^+$  279.0628, found 279.0635. The NMR spectra are in accordance with literature.<sup>15</sup>

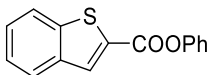

#### Phenyl benzo[*b*]thiophene-2-carboxylate (4r)

According to the general procedure for ester synthesis, **4r** was obtained as a white solid.  $^1\text{H}$  NMR (400 MHz,  $\text{CDCl}_3$ ):  $\delta$  = 7.25 – 7.32 (m, 3H), 7.42 – 7.48 (m, 3H), 7.51 (t,  $J$  = 7.2 Hz, 1H), 7.90 – 7.95 (m, 2H), 8.26 (s, 1H) ppm.  $^{13}\text{C}$  NMR (100 MHz,  $\text{CDCl}_3$ ):  $\delta$  = 121.7, 123.0, 125.2, 125.9, 126.3, 127.5, 129.7, 132.0, 132.8, 138.8, 142.8, 150.7, 161.4 ppm. HRMS (ESI $^+$ ) calcd for  $\text{C}_{15}\text{H}_{10}\text{NaO}_2\text{S}$  [M+Na] $^+$  277.0294, found 277.0291. The NMR spectra are in accordance with literature.<sup>16</sup>

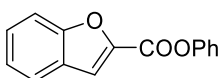

#### Phenyl benzofuran-2-carboxylate (**4s**)

According to the general procedure for ester synthesis, **4s** was obtained as a white solid.  $^1\text{H}$  NMR (400 MHz,  $\text{CDCl}_3$ ):  $\delta$  = 7.26 – 7.32 (m, 3H), 7.34 – 7.38 (m, 1H), 7.43 – 7.47 (m, 2H), 7.48 – 7.53 (m, 1H), 7.65 (d,  $J$  = 8.4 Hz, 1H), 7.73 – 7.76 (m, 2H) ppm.  $^{13}\text{C}$  NMR (100 MHz,  $\text{CDCl}_3$ ):  $\delta$  = 112.6, 115.6, 121.7, 123.2, 124.1, 126.4, 127.0, 128.2, 129.7, 144.9, 150.3, 156.2, 158.0 ppm. HRMS (ESI $^+$ ) calcd for  $\text{C}_{15}\text{H}_{10}\text{NaO}_3$  [M+Na] $^+$  261.0522, found 261.0525. The NMR spectra are in accordance with literature.<sup>17</sup>

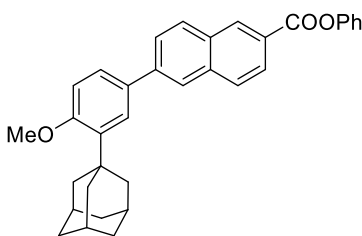

#### Phenyl 6-(3-(1-adamantyl)-4-methoxyphenyl)-2-naphthoate (**4t**)

According to the general procedure for ester synthesis, **4t** was obtained as a white solid.  $^1\text{H}$  NMR (400 MHz,  $\text{CDCl}_3$ ):  $\delta$  = 1.81 (s, 6H), 2.12 (s, 3H), 2.20 (s, 6H), 3.92 (s, 3H), 7.01 (d,  $J$  = 8.4 Hz, 1H), 7.28 – 7.31 (m, 3H), 7.45 – 7.49 (m, 2H), 7.57 (dd,  $J$  = 8.0 Hz, 2.0 Hz, 1H), 7.63 (d,  $J$  = 2.4 Hz, 1H), 7.84 (dd,  $J$  = 8.4 Hz, 1.6 Hz, 1H), 7.99 (d,  $J$  = 8.8 Hz, 1H), 8.05 (d,  $J$  = 9.6 Hz, 2H), 8.21 (dd,  $J$  = 8.8 Hz, 2.0 Hz, 1H), 8.80 (s, 1H) ppm.  $^{13}\text{C}$  NMR (100 MHz,  $\text{CDCl}_3$ ):  $\delta$  = 29.2, 37.2, 37.4, 40.7, 55.3, 112.2, 121.9, 124.9, 125.9, 125.95, 126.03, 126.1, 126.3, 126.8, 128.6, 129.7, 130.0, 131.4, 131.8, 132.5, 136.4, 139.1, 141.9, 151.2, 159.1, 165.6 ppm. HRMS (ESI $^+$ ) calcd for  $\text{C}_{34}\text{H}_{32}\text{NaO}_3$  [M+Na] $^+$  511.2244, found 511.2243. IR (KBr): 2904, 2850, 1730, 1622, 1474, 1276, 1078, 814, 740, 691  $\text{cm}^{-1}$ .

## VI. Characterization data of methylated products



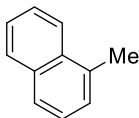

### 1-Methylnaphthalene (2a)

**From nitro group:** According to the general methylation method of nitrobenzene, **2a** was obtained as colorless liquid starting from **1a** (23 mg, 80% yield).

**From amide:** According to the general methylation procedure of amide, **2a** was obtained as colorless liquid starting from **3a** (24 mg, 85% yield).

**From ester:** According to the general methylation procedure of ester, **2a** was obtained as colorless liquid starting from **4a** (21 mg, 72% yield).

$^1\text{H}$  NMR (400 MHz,  $\text{CDCl}_3$ ):  $\delta$  = 2.72 (s, 3H), 7.34 (d,  $J$  = 6.8 Hz, 1H), 7.36 – 7.42 (m, 1H), 7.48 – 7.57 (m, 2H), 7.73 (d,  $J$  = 8.0 Hz, 1H), 7.83 – 7.89 (m, 1H), 8.02 (dd,  $J$  = 8.4, 1.2 Hz, 1H) ppm.  $^{13}\text{C}$  NMR (100 MHz,  $\text{CDCl}_3$ ):  $\delta$  = 19.5, 124.2, 125.67, 125.70, 125.8, 126.5, 126.7, 128.6, 132.7, 133.7, 134.4 ppm. The NMR spectra are in accordance with literature.<sup>18</sup>

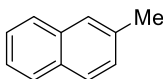

### 2-Methylnaphthalene (2b)

**From nitro group:** According to the general methylation method of nitrobenzene, **2b** was obtained as colorless liquid starting from **1b** (19 mg, 68% yield).

**From amide:** According to the general methylation procedure of amide, **2b** was obtained as colorless liquid starting from **3b** (20 mg, 70% yield).

**From ester:** According to the general methylation procedure of ester, **2b** was obtained as colorless liquid starting from **4b** (21 mg, 75% yield).

$^1\text{H}$  NMR (400 MHz,  $\text{CDCl}_3$ ):  $\delta$  = 2.53 (s, 3H), 7.33 (dd,  $J$  = 8.4 Hz, 1.6 Hz, 1H), 7.39 – 7.47 (m, 2H), 7.62 (s, 1H), 7.74 – 7.78 (m, 2H), 7.81 (d,  $J$  = 7.6 Hz, 1H) ppm.  $^{13}\text{C}$  NMR (100 MHz,  $\text{CDCl}_3$ ):  $\delta$  = 21.9, 125.1, 126.0, 127.0, 127.4, 127.7, 127.8, 128.2, 131.8, 133.8, 135.6 ppm. The NMR spectra are in accordance with literature.<sup>18</sup>

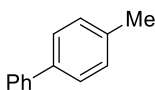

### 4-Methyl-1,1'-biphenyl (2c)

**From nitro group:** According to the general methylation method of nitrobenzene, **2c** was obtained as a white solid starting from **1c** (22 mg, 65% yield).

**From amide:** According to the general methylation procedure of amide, **2c** was obtained as a white solid starting from **3c** (28 mg, 82% yield).

**From ester:** According to the general methylation procedure of ester, **2c** was obtained as a white solid starting from **4c** (22 mg, 66% yield).

$^1\text{H}$  NMR (400 MHz,  $\text{CDCl}_3$ ):  $\delta$  = 2.40 (s, 3H), 7.27 (d,  $J$  = 8.4 Hz, 2H), 7.30 – 7.35 (m, 1H), 7.40 – 7.45 (m, 2H), 7.49 – 7.52 (m, 2H), 7.57 – 7.60 (m, 2H) ppm.  $^{13}\text{C}$  NMR (100 MHz,  $\text{CDCl}_3$ ):  $\delta$  = 21.2, 127.10, 127.11, 127.13, 128.8, 129.6, 137.2, 138.5, 141.3 ppm. The NMR spectra are in accordance with literature.<sup>18</sup>

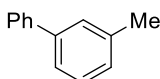

### 3-Methyl-1,1'-biphenyl (**2d**)

**From nitro group:** According to the general methylation method of nitrobenzene, **2d** was obtained as yellowish liquid starting from **1d** (25 mg, 74% yield)

**From amide:** According to the general methylation procedure of amide, **2d** was obtained as yellowish liquid starting from **3d** (23 mg, 68% yield)

**From ester:** According to the general methylation procedure of ester, **2d** was obtained as yellowish liquid starting from **4d** (25 mg, 76% yield).

$^1\text{H}$  NMR (400 MHz,  $\text{CDCl}_3$ ):  $\delta$  = 2.45 (s, 3H), 7.18 – 7.21 (m, 1H), 7.34 – 7.38 (m, 2H), 7.41 – 7.48 (m, 4H), 7.60 – 7.63 (m, 2H) ppm.  $^{13}\text{C}$  NMR (100 MHz,  $\text{CDCl}_3$ ):  $\delta$  = 21.7, 124.4, 127.29, 127.31, 128.11, 128.12, 128.79, 128.82, 138.4, 141.4, 141.5 ppm. The NMR spectra are in accordance with literature.<sup>18</sup>

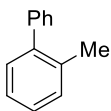

### 2-Methyl-1,1'-biphenyl (**2e**)

**From nitro group:** According to the general methylation method of nitrobenzene, **2e** was obtained as yellowish liquid starting from **1e** (18 mg, 53% yield)

**From amide:** According to the general methylation procedure of amide, **2e** was obtained as yellowish liquid starting from **3e** (20 mg, 60% yield)

**From ester:** According to the general methylation procedure of ester, **2e** was obtained as yellowish liquid starting from **4e** (17 mg, 52% yield).

$^1\text{H}$  NMR (400 MHz,  $\text{CDCl}_3$ ):  $\delta$  = 2.28 (s, 3H), 7.22 – 7.25 (m, 2H), 7.26 – 7.28 (m, 1H), 7.30 – 7.37 (m, 3H), 7.39 – 7.45 (m, 2H), 7.45 – 7.62 (m, 1H) ppm.  $^{13}\text{C}$  NMR (100 MHz,  $\text{CDCl}_3$ ):  $\delta$  = 20.6, 125.9, 126.9, 127.3, 127.4, 128.2, 128.9, 129.3, 129.9, 130.4, 135.5 ppm. The NMR spectra are in accordance with literature.<sup>18</sup>

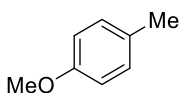

#### 4-Methylanisole (2f)

**From nitrobenzene:** The methylation of nitrobenzene **1f** was conducted at 130 °C. Diphenylacetylene (35.6 mg, 0.2 mmol) was subjected as internal standard after the completion of reaction. The yield of **2f** was determined by GC analysis using calibration curves based on data from the authentic sample of **2f** and diphenylacetylene (84% yield).

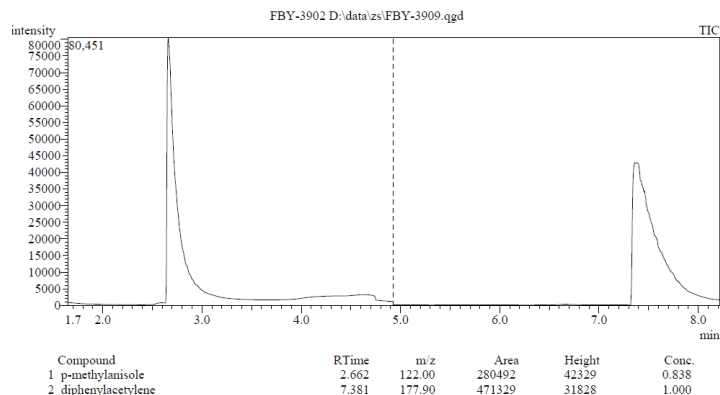

ID#1 m/z:122.00 Name:p-methylanisole  
 $f(x)=0.709868*x+0.000000$   
 $r1=0.999478$   $r2=0.998957$   
 MeanRF:0.68 RFSD:0.06 RFRSD:8.97  
 CurveType:Least square  
 ZeroThrough:Yes  
 WeightedRegression:No  
 Internal Standard

Calibration Curve

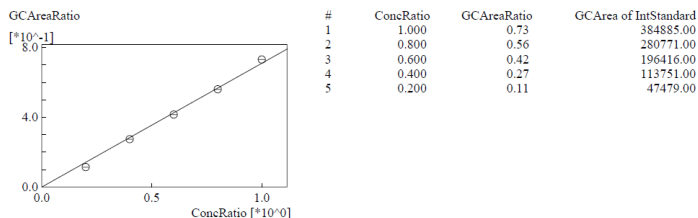

**From amide:** According to the general methylation method of amide, the decarbonylative methylation of amide **3f** was conducted with 2 equiv Et<sub>3</sub>N added. Diphenylacetylene (35.6 mg, 0.2 mmol) was subjected as internal standard after the completion of reaction. The yields of **2f** was determined by GC analysis using calibration curves based on data from the authentic sample of **2f** and diphenylacetylene (47% yield).

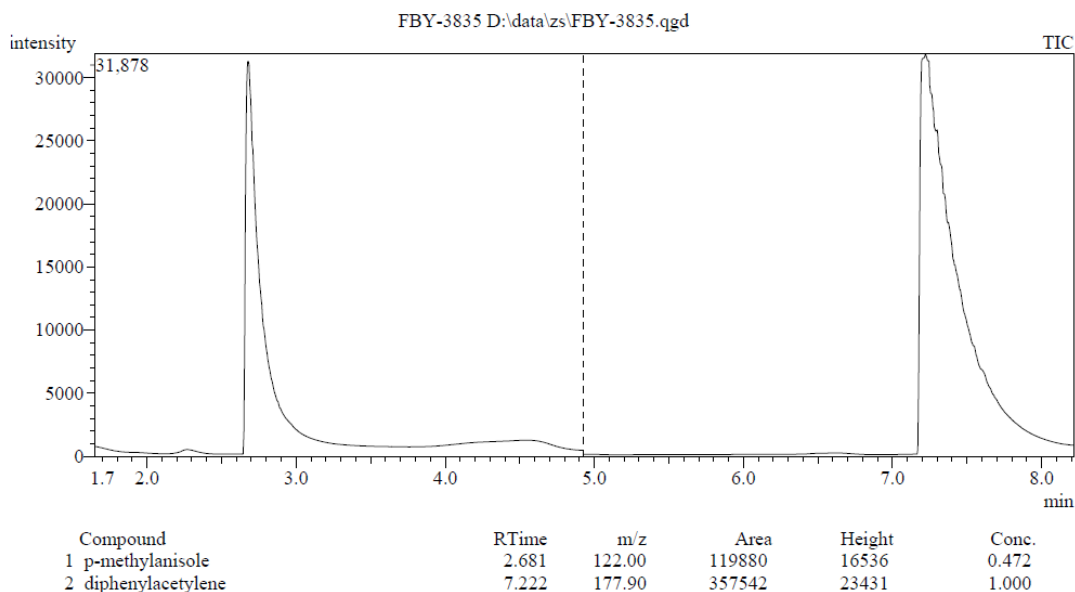

ID#:1 m/z:122.00 Name:p-methylanisole  
 $f(x)=0.709868*x+0.000000$   
 $r1=0.999478$   $r2=0.998957$   
 MeanRF:0.68 RFSD:0.06 RFRSD:8.97  
 CurveType:Least square  
 ZeroThrough:Yes  
 WeightedRegression:No  
 Internal Standard

Calibration Curve

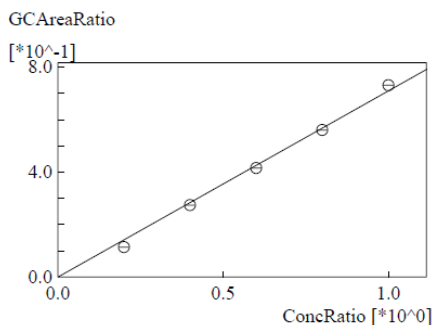

**From ester:** According to the general methylation procedure of ester starting from **4f**, diphenylacetylene (35.6 mg, 0.2 mmol) was subjected as internal standard after the completion of reaction. The yield of **2f** were determined by GC analysis using calibration curves based on data from the authentic sample of **2f** and diphenylacetylene (13% yield).

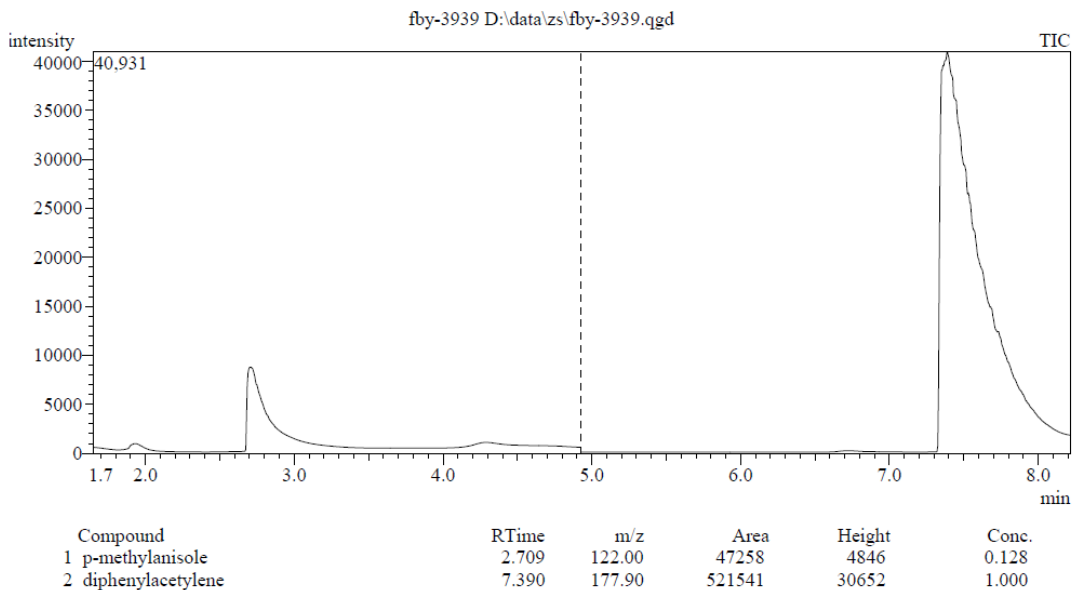

ID#:1 m/z:122.00 Name:p-methylanisole  
 $f(x)=0.709868*x+0.000000$   
 $r1=0.999478$   $r2=0.998957$   
 MeanRF:0.68 RFSD:0.06 RFRSD:8.97  
 CurveType:Least square  
 ZeroThrough:Yes  
 WeightedRegression:No  
 Internal Standard

Calibration Curve

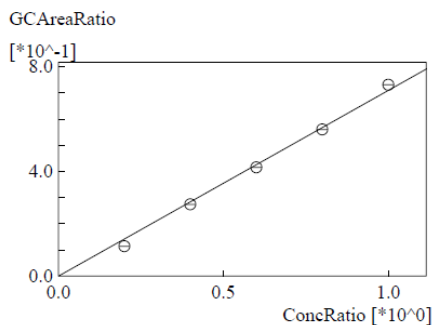

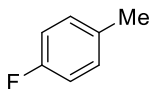

### 1-Fluoro-4-methylbenzene (2g)

**From nitro group:** According to the general methylation method of nitrobenzene starting from **1g**, mesitylene (27.8  $\mu$ L, 0.2 mmol) was subjected as internal standard after the completion of reaction. The yield of **2g** was determined by GC analysis using calibration curves based on data from the authentic sample of **2g** and mesitylene (46% yield).

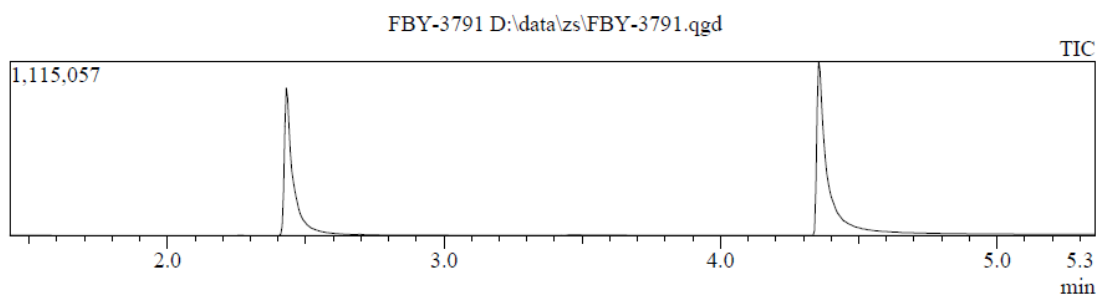

| IDName                        | RTime | m/z    | Area    | Height | Conc. |
|-------------------------------|-------|--------|---------|--------|-------|
| 1 Benzene, 1-fluoro-4-methyl- | 2.432 | 109.00 | 1275774 | 565452 | 0.464 |
| 2 mes                         | 4.360 | 120.00 | 795469  | 320903 | 1.000 |

#### Calibration Curve

ID#:1 m/z:109.00 Name: Benzene, 1-fluoro-4-methyl-  
 $f(x)=3.457415*x+0.000000$   
 $r1=0.998830$   $r2=0.997661$   
 MeanRF:3.66 RFSD:0.30 RFRSD:8.21  
 CurveType:Least square  
 ZeroThrough:Yes  
 WeightedRegression:No  
 Internal Standard

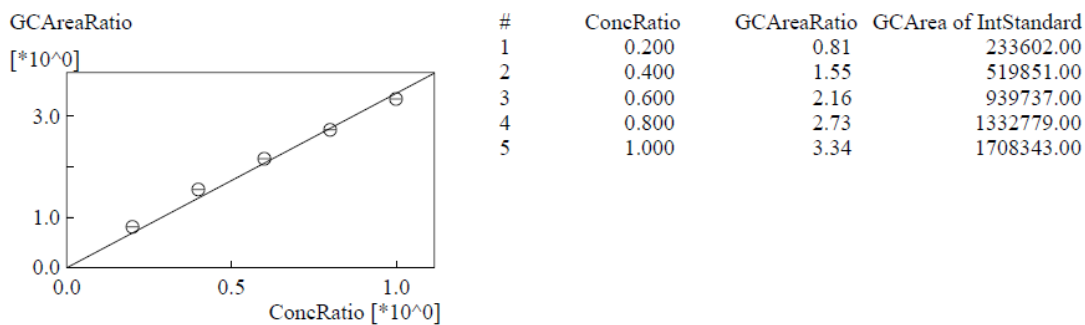

**From amide:** According to the general methylation procedure of amide starting from **3g**, mesitylene (27.8  $\mu\text{L}$ , 0.2 mmol) was subjected as internal standard after the completion of reaction. The yield of **2g** was determined by GC analysis using calibration curves based on data from the authentic sample of **2g** and mesitylene (47% yield).

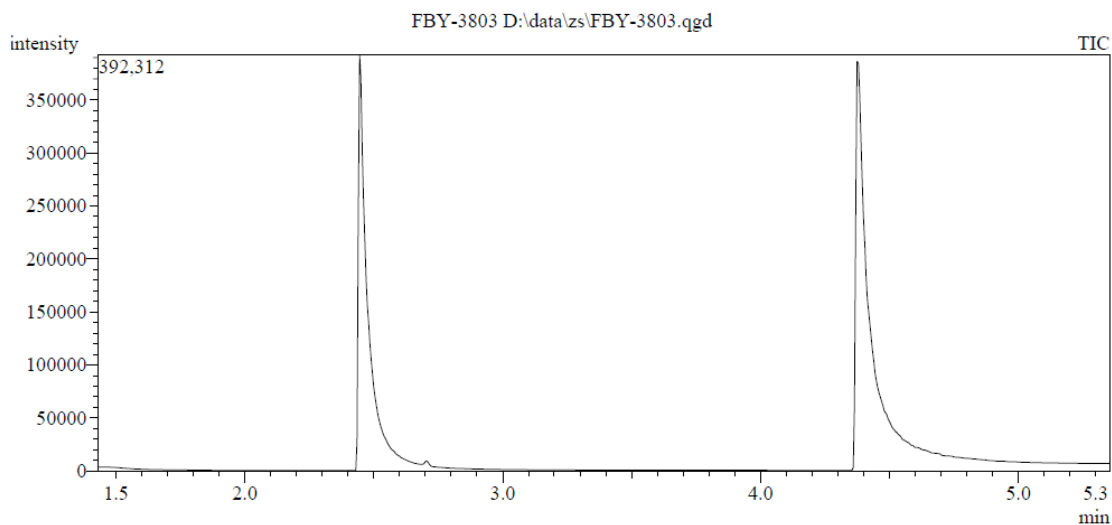

| Compound                      | RTime | m/z    | Area   | Height | Conc. |
|-------------------------------|-------|--------|--------|--------|-------|
| 1 Benzene, 1-fluoro-4-methyl- | 2.447 | 109.00 | 621320 | 229856 | 0.470 |
| 2 mes                         | 4.382 | 120.00 | 382036 | 111524 | 1.000 |

#### Calibration Curve

ID#:1 m/z:109.00 Name: Benzene, 1-fluoro-4-methyl-  
 $f(x)=3.457415*x+0.000000$   
 $r1=0.998830$   $r2=0.997661$   
 MeanRF:3.66 RFSD:0.30 RFRSD:8.21  
 CurveType:Least square  
 ZeroThrough:Yes  
 WeightedRegression:No  
 Internal Standard

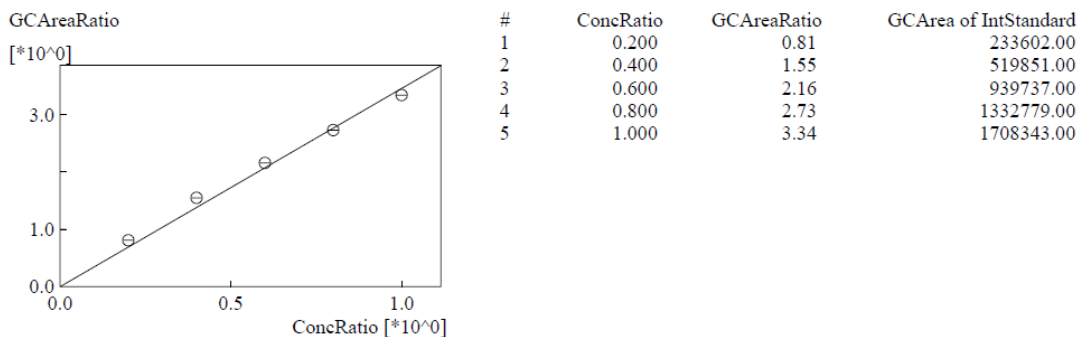

**From ester:** According to the general methylation procedure of ester starting from **4g**, mesitylene (27.8  $\mu$ L, 0.2 mmol) was subjected as internal standard after the completion of reaction. The yield of **2g** was determined by GC analysis using calibration curves based on data from the authentic sample of **2g** and mesitylene (68% yield).

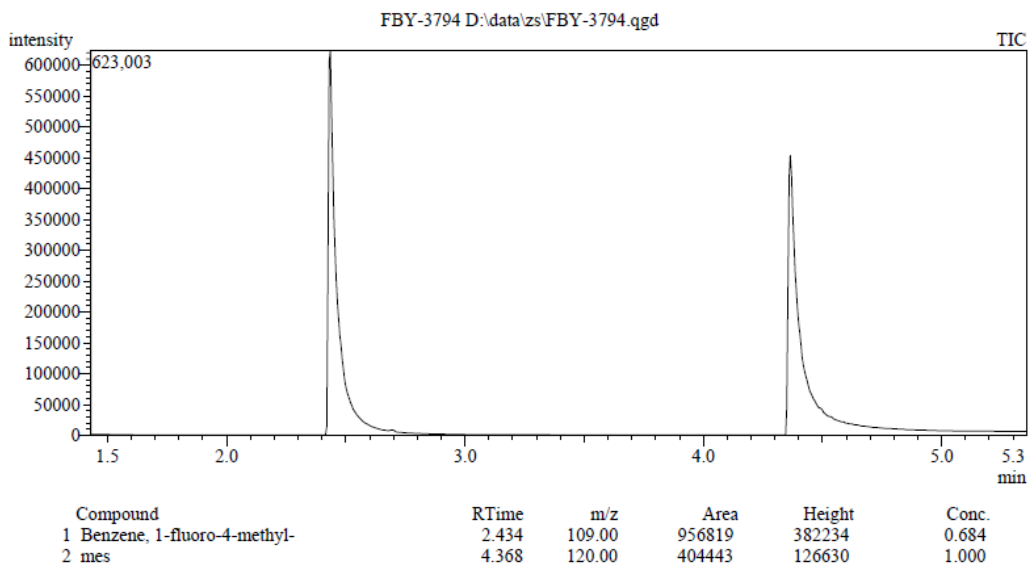

Calibration Curve  
 ID#:1 m/z:109.00 Name: Benzene, 1-fluoro-4-methyl-  
 $f(x) = 3.457415 * x + 0.000000$   
 $rr1 = 0.998830$   $rr2 = 0.997661$   
 MeanRF:3.66 RFS:0.30 RFRSD:8.21  
 CurveType:Least square  
 ZeroThrough:Yes  
 WeightedRegression:No  
 Internal Standard

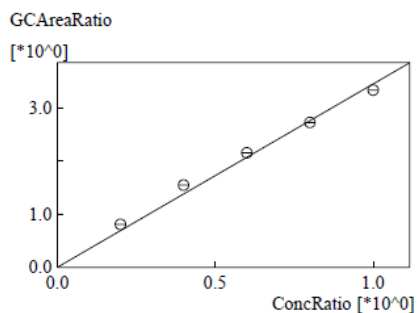



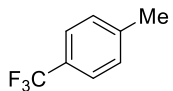

### 4-Methylbenzotrifluoride (2h)

**From nitro group:** According to the general methylation method of nitrobenzene starting from **1h**, mesitylene (27.8  $\mu$ L, 0.2 mmol) was subjected as internal standard after the completion of reaction. The yield of **2h** was determined by GC analysis using calibration curves based on data from the authentic sample of **2h** and mesitylene (62% yield).

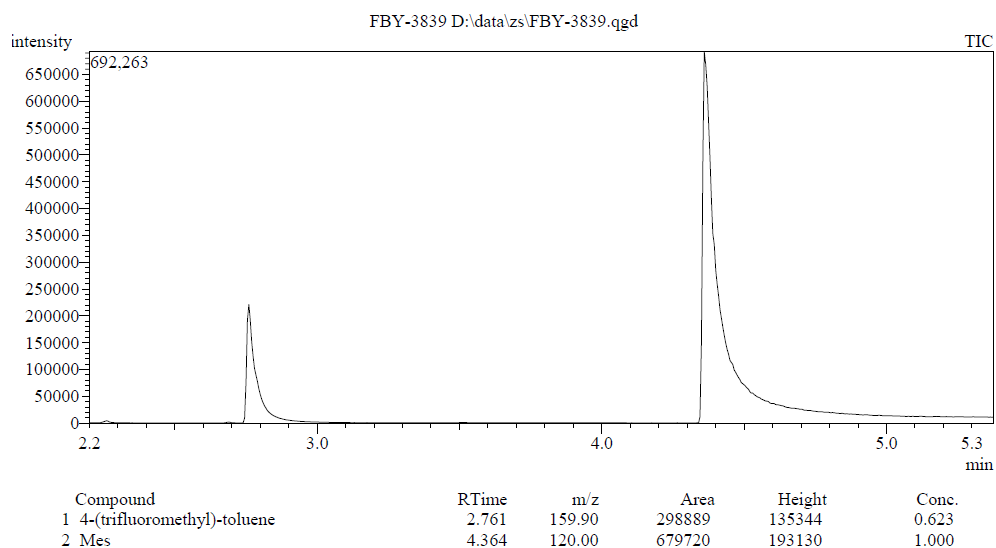

ID#:1 m/z:159.90 Name:4-(trifluoromethyl)-toluene  
 $f(x)=0.705366*x+0.000000$   
 $r1=0.986979$   $r2=0.974128$   
 MeanRF:0.68 RFSD:0.07 RFRSD:9.64  
 CurveType:Least square  
 ZeroThrough:Yes  
 WeightedRegression:No  
 Internal Standard

Calibration Curve

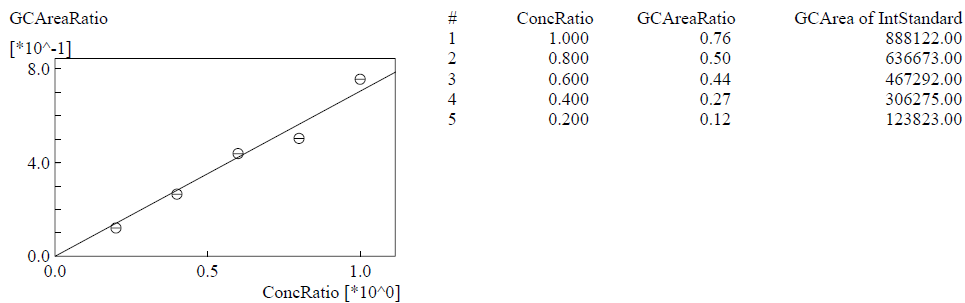

**From amide:** According to the general methylation method of amide, the decarbonylative methylation of amide **3h** was conducted with 2 equiv Et<sub>3</sub>N added. Mesitylene (27.8 μL, 0.2 mmol) was subjected as internal standard after the completion of reaction. The yield of **2h** was determined by GC analysis using calibration curves based on data from the authentic sample of **2h** and mesitylene (55% yield).

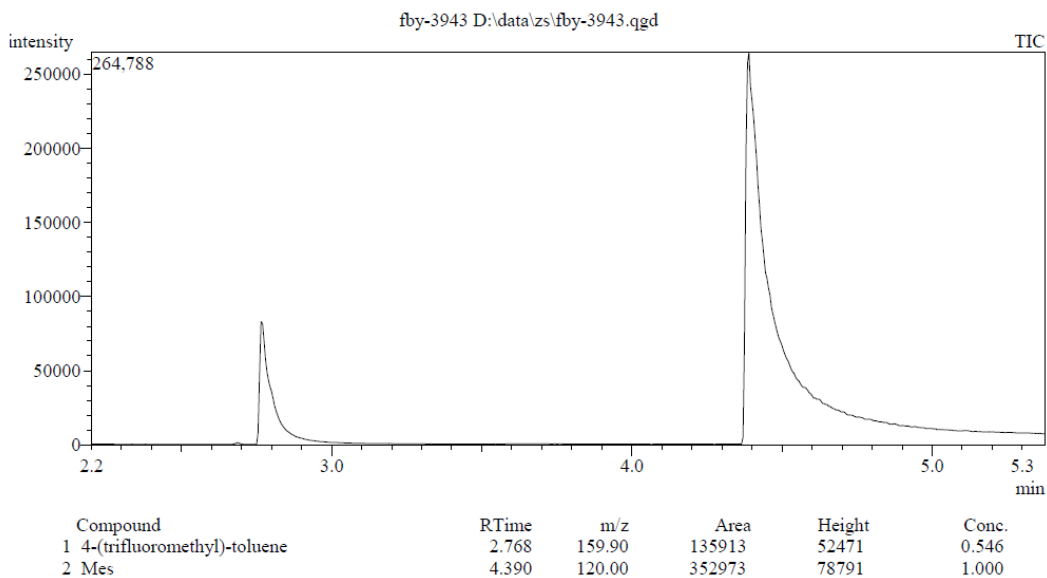

ID#:1 m/z:159.90 Name:4-(trifluoromethyl)-toluene  
 f(x)=0.705366\*x+0.000000  
 r1=0.986979 r2=0.974128  
 MeanRF:0.68 RFSD:0.07 RFRSD:9.64  
 CurveType:Least square  
 ZeroThrough:Yes  
 WeightedRegression:No  
 Internal Standard

Calibration Curve

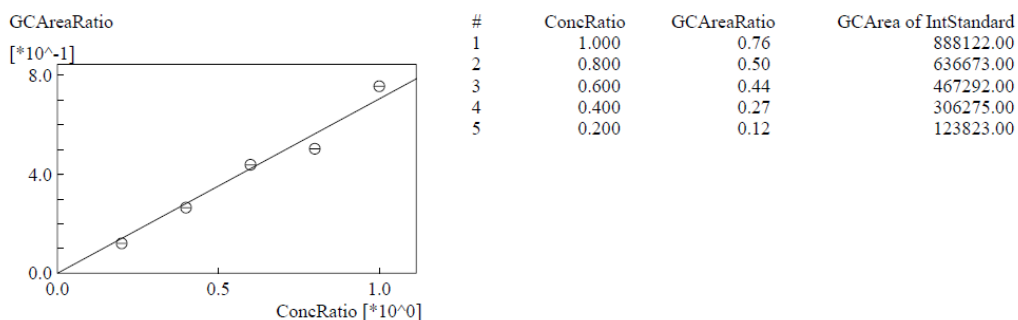

**From ester:** According to the general methylation procedure of ester starting from **4h**, mesitylene (27.8  $\mu$ L, 0.2 mmol) was subjected as internal standard after the completion of reaction. The yield of **2h** was determined by GC analysis using calibration curves based on data from the authentic sample of **2h** and mesitylene (39% yield).

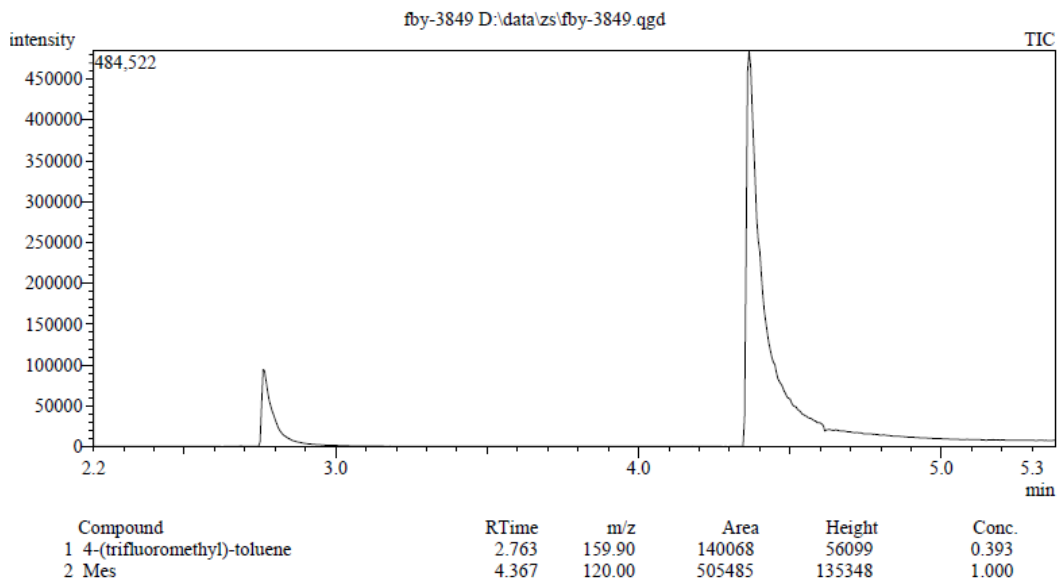

Calibration Curve

ID#1 m/z:159.90 Name:4-(trifluoromethyl)-toluene  
 $f(x)=0.705366*x+0.000000$   
 $r1=0.986979$   $r2=0.974128$   
 MeanRF:0.68 RFSD:0.07 RFRSD:9.64  
 CurveType:Least square  
 ZeroThrough:Yes  
 WeightedRegression:No  
 Internal Standard

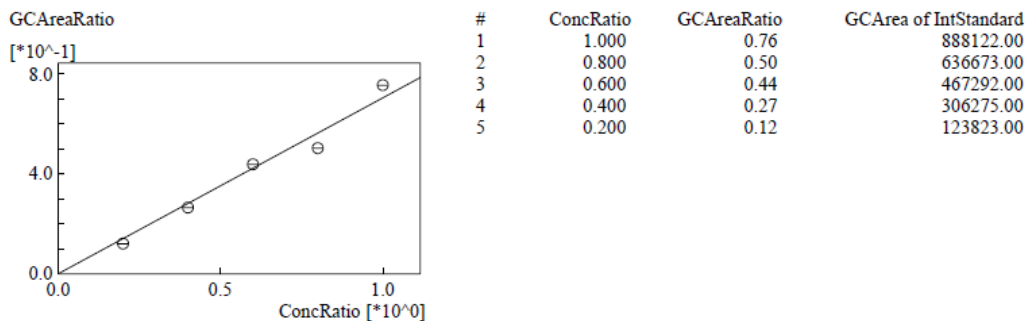

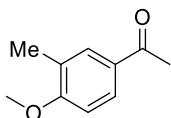

#### 1-(4-Methoxy-3-methylphenyl)ethan-1-one (**2i**)

**From nitro group:** According to the general methylation method of nitrobenzene, **2i** was obtained as colorless liquid starting from **1i** (26 mg, 78% yield).  $^1\text{H}$  NMR (400 MHz,  $\text{CDCl}_3$ ):  $\delta$  = 2.24 (s, 3H), 2.54 (s, 3H), 3.89 (s, 3H), 6.84 (d,  $J$  = 8.4 Hz, 1H), 7.62 – 7.77 (m, 1H), 7.80 – 7.83 (m, 1H) ppm.  $^{13}\text{C}$  NMR (100 MHz,  $\text{CDCl}_3$ ):  $\delta$  = 16.4, 26.5, 55.6, 109.3, 126.9, 128.6, 129.9, 131.0, 161.9, 197.3 ppm. The NMR spectra are in accordance with literature.<sup>19</sup>

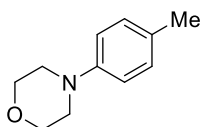

#### 4-(*p*-Tolyl)morpholine (**2j**)

**From nitro group:** According to the general methylation method of nitrobenzene, **2j** was obtained as a white solid starting from **1j** (14 mg, 40% yield).  $^1\text{H}$  NMR (400 MHz,  $\text{CDCl}_3$ ):  $\delta$  = 2.28 (s, 3H), 3.10 – 3.14 (m, 4H), 3.85 – 3.88 (m, 4H), 6.84 (d,  $J$  = 8.4 Hz, 2H), 7.10 (d,  $J$  = 8.4 Hz, 2H) ppm.  $^{13}\text{C}$  NMR (100 MHz,  $\text{CDCl}_3$ ):  $\delta$  = 20.6, 50.1, 67.1, 116.2, 129.7, 129.8, 149.3 ppm. The NMR spectra are in accordance with literature.<sup>20</sup>

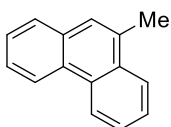

#### 9-Methylphenanthrene (**2k**)

**From nitro group:** According to the general methylation method of nitrobenzene, **2k** was obtained as a white solid starting from **1k** (32 mg, 82% yield).  $^1\text{H}$  NMR (400 MHz,  $\text{CDCl}_3$ ):  $\delta$  = 2.76 (s, 3H), 7.55 – 7.64 (m, 3H), 7.64 – 7.71 (m, 2H), 7.83 (dd,  $J$  = 6.4, 1.6 Hz, 1H), 8.06 – 8.11 (m, 1H), 8.67 (d,  $J$  = 7.2 Hz, 1H), 8.71 – 8.78 (m, 1H) ppm.  $^{13}\text{C}$  NMR (100 MHz,  $\text{CDCl}_3$ ):  $\delta$  = 20.2, 122.6, 123.1, 124.8, 125.9, 126.3, 126.65, 126.72, 126.9, 128.0, 129.8, 130.5, 132.1, 132.2, 132.6 ppm. The NMR spectra are in accordance with literature.<sup>21</sup>

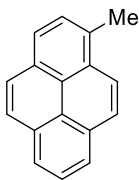

### 1-Methylpyrene (2l)

**From nitro group:** According to the general methylation method of nitrobenzene, **2l** was obtained as a white solid starting from **1l** (33 mg, 76% yield).  $^1\text{H}$  NMR (400 MHz,  $\text{CDCl}_3$ ):  $\delta$  = 3.00 (s, 3H), 7.85 – 7.90 (m, 1H), 7.98 – 8.07 (m, 3H), 8.08 – 8.14 (m, 2H), 8.16 – 8.22 (m, 2H), 8.25 (d,  $J$  = 9.2 Hz, 1H) ppm.  $^{13}\text{C}$  NMR (100 MHz,  $\text{CDCl}_3$ ):  $\delta$  = 20.0, 123.8, 124.8, 124.87, 124.92, 124.93, 124.95, 125.9, 126.5, 127.2, 127.7, 128.0, 129.3, 129.8, 131.1, 131.5, 132.4 ppm. The NMR spectra are in accordance with literature.<sup>21</sup>

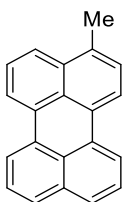

### 3-Methylperylene (2m)

**From nitro group:** According to the general methylation method of nitrobenzene, **2m** was obtained as a pale yellow solid starting from **1m** (27 mg, 51% yield).  $^1\text{H}$  NMR (400 MHz,  $\text{CDCl}_3$ ):  $\delta$  = 2.66 (s, 3H), 7.34 (d,  $J$  = 8.4 Hz, 1H), 7.44 – 7.56 (m, 3H), 7.67 (t,  $J$  = 8.0 Hz, 2H), 7.83 (d,  $J$  = 8.4 Hz, 1H), 8.10 (d,  $J$  = 7.6 Hz, 1H), 8.13 – 8.24 (m, 3H) ppm.  $^{13}\text{C}$  NMR (100 MHz,  $\text{CDCl}_3$ ):  $\delta$  = 20.0, 119.8, 120.1, 120.27, 120.29, 124.2, 126.4, 126.65, 126.71, 127.4, 127.6, 127.9, 128.6, 128.9, 129.6, 131.5, 131.6, 131.7, 133.8, 134.4, 134.8 ppm. IR (KBr): 3044, 2943, 2898, 2856, 1500, 1387, 1186, 817, 762  $\text{cm}^{-1}$ .

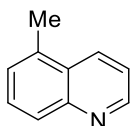

### 5-Methylquinoline (2n)

**From nitro group:** According to the general methylation method of nitrobenzene, **2n** was obtained as yellow liquid starting from **1n** (24 mg, 84% yield).  $^1\text{H}$  NMR (400 MHz,  $\text{CDCl}_3$ ):  $\delta$  = 2.68 (s, 3H), 7.37 (d,  $J$  = 7.2 Hz, 1H), 7.40 – 7.45 (m, 1H), 7.58 – 7.62 (m, 1H), 7.96 (d,  $J$  = 8.4 Hz, 1H), 8.31 – 8.33 (m, 1H), 8.91 (d,  $J$  = 4.0 Hz, 1H) ppm.  $^{13}\text{C}$  NMR (100 MHz,  $\text{CDCl}_3$ ):  $\delta$  = 18.7, 120.8, 127.1,

127.7, 127.8, 129.3, 132.6, 134.7, 148.6, 150.0 ppm. The NMR spectra are in accordance with literature.<sup>22</sup>

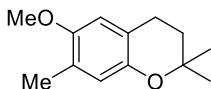

### 6-Methoxy-2,2,7-trimethylchromane (2o)

**From nitro group:** According to the general methylation method of nitrobenzene, **2o** was obtained as a white solid starting from **1o** (19 mg, 45% yield). <sup>1</sup>H NMR (400 MHz, CDCl<sub>3</sub>): δ = 1.31 (s, 6H), 1.77 (t, *J* = 6.8 Hz, 2H), 2.16 (s, 3H), 2.75 (t, *J* = 6.8 Hz, 2H), 3.74 (s, 3H), 6.46 (d, *J* = 3.6 Hz, 1H), 6.56 – 6.59 (m, 1H) ppm. <sup>13</sup>C NMR (400 MHz, CDCl<sub>3</sub>): δ = 16.4, 23.2, 26.9, 27.1, 33.0, 55.8, 73.6, 111.1, 114.8, 120.8, 127.3, 146.3, 152.2 ppm. HRMS (ESI<sup>+</sup>) calcd for C<sub>13</sub>H<sub>19</sub>NO<sub>2</sub> [M+H]<sup>+</sup> 207.1380, found 207.1378. IR (KBr): 2954, 2922, 2850, 1479, 1457, 1423, 1250, 1203, 1049, 1020, 798, 711 cm<sup>-1</sup>.

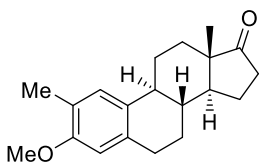

### 2-Methylestrone-3-methyl ether (2p)

**From nitro group:** According to the general methylation method of nitrobenzene, **2p** was obtained as yellow liquid starting from **1p** (37 mg, 62%). <sup>1</sup>H NMR (400 MHz, CDCl<sub>3</sub>): δ = 0.91 (s, 3H), 1.38 – 1.46 (m, 1H), 1.47 – 1.52 (m, 2H), 1.52 – 1.56 (m, 1H), 1.59 (d, *J* = 9.4 Hz, 1H), 1.61 – 1.66 (m, 1H), 1.92 – 2.18 (m, 4H), 2.19 (s, 3H), 2.21 – 2.29 (m, 1H), 2.38 – 2.46 (m, 1H), 2.46 – 2.56 (m, 1H), 2.83 – 2.95 (m, 2H), 3.80 (d, *J* = 1.2 Hz, 3H), 6.57 (s, 1H), 7.07 (s, 1H) ppm. <sup>13</sup>C NMR (400 MHz, CDCl<sub>3</sub>): δ = 14.0, 16.2, 21.7, 26.1, 26.8, 29.7, 31.7, 36.0, 38.6, 44.1, 48.2, 50.5, 55.4, 110.5, 124.0, 127.8, 131.3, 134.8, 155.9, 221.2 ppm. HRMS (ESI<sup>+</sup>) calcd for C<sub>20</sub>H<sub>27</sub>O<sub>2</sub> [M+H]<sup>+</sup> 299.2006, found 299.2014. IR (KBr): 2994, 2874, 1739, 1612, 1508, 1256, 1214, 1098, 1053, 1024, 890, 830 cm<sup>-1</sup>.

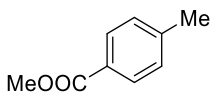

### Methyl 4-methylbenzoate (2q)

**From amide:** According to the general methylation procedure of amide, **2q** was obtained as a white solid starting from **3q** (23 mg, 78% yield).

**From ester:** According to the general methylation procedure of ester, **2q** was obtained as a white solid starting from **4q** (23 mg, 80% yield).

$^1\text{H}$  NMR (400 MHz,  $\text{CDCl}_3$ ):  $\delta$  = 2.40 (s, 3H), 3.90 (s, 3H), 7.23 (d,  $J$  = 8.0 Hz, 2H), 7.93 (d,  $J$  = 8.4 Hz, 2H) ppm.  $^{13}\text{C}$  NMR (100 MHz,  $\text{CDCl}_3$ ):  $\delta$  = 21.8, 52.1, 127.5, 129.2, 129.7, 143.7, 167.3 ppm. The NMR spectra are in accordance with literature.<sup>23</sup>

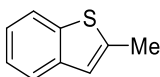

### 2-Methylbenzo[b]thiophene (2r)

**From amide:** According to the general methylation procedure of amide, **2r** was obtained as a white solid starting from **3r** (23 mg, 76% yield).

**From ester:** According to the general methylation procedure of ester, **2r** was obtained as a white solid starting from **4r** (21 mg, 70% yield).

$^1\text{H}$  NMR (400 MHz,  $\text{CDCl}_3$ ):  $\delta$  = 2.60 (d,  $J$  = 1.2 Hz, 3H), 6.97 – 7.00 (m, 1H), 7.26 (td,  $J$  = 7.6, 1.4 Hz, 1H), 7.29 – 7.34 (m, 1H), 7.66 (d,  $J$  = 7.2 Hz, 1H), 7.76 (dd,  $J$  = 8.0, 1.2 Hz, 1H) ppm.  $^{13}\text{C}$  NMR (100 MHz,  $\text{CDCl}_3$ ):  $\delta$  = 16.3, 121.7, 122.1, 122.6, 123.5, 124.2, 139.8, 140.6, 141.0 ppm. The NMR spectra are in accordance with literature.<sup>24</sup>

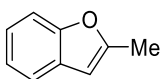

### 2-Methylbenzofuran (2s)

**From amide:** According to the general methylation procedure of amide, **2s** was obtained as colorless liquid starting from **3s** (14 mg, 54% yield).

**From ester:** According to the general methylation procedure of ester, **2s** was obtained as colorless liquid starting from **4s** (22 mg, 66% yield).

$^1\text{H}$  NMR (400 MHz,  $\text{CDCl}_3$ ):  $\delta$  = 2.46 (d,  $J$  = 1.2 Hz, 3H), 6.37 (penta,  $J$  = 1.0 Hz, 1H), 7.13 – 7.23 (m, 2H), 7.39 – 7.42 (m, 1H), 7.45 – 7.49 (m, 1H) ppm.  $^{13}\text{C}$  NMR (100 MHz,  $\text{CDCl}_3$ ):  $\delta$  = 14.2, 102.7, 110.7, 120.2, 122.5, 123.2, 129.3, 154.8, 155.5 ppm. The NMR spectra are in accordance with literature.<sup>24</sup>

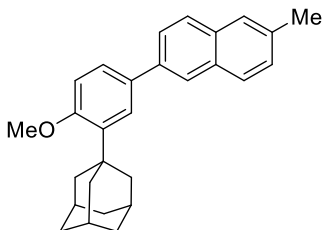

## 2-Methyl-6-(3-(1-adamantyl)-4-methoxyphenyl)-naphthalene (2t)

**From ester:** According to the general methylation procedure of ester, **2t** was obtained as a white solid starting from **4t** (53 mg, 69% yield).  $^1\text{H}$  NMR (400 MHz,  $\text{CDCl}_3$ ):  $\delta$  = 1.83 (s, 6H), 2.13 (s, 3H), 2.21 (s, 6H), 2.54 (s, 3H), 3.91 (s, 3H), 7.00 (d,  $J$  = 8.4 Hz, 1H), 7.34 (dd,  $J$  = 8.4, 1.3 Hz, 1H), 7.54 (dd,  $J$  = 8.4, 2.3 Hz, 1H), 7.60 – 7.65 (m, 2H), 7.71 (dd,  $J$  = 8.5, 1.6 Hz, 1H), 7.79 – 7.84 (m, 2H), 7.96 (s, 1H) ppm.  $^{13}\text{C}$  NMR (100 MHz,  $\text{CDCl}_3$ ):  $\delta$  = 21.9, 29.3, 37.3, 37.3, 40.7, 55.3, 112.2, 124.9, 125.6, 125.8, 126.0, 126.7, 127.7, 128.0, 128.6, 132.1, 132.6, 133.4, 135.3, 138.2, 138.9, 158.5 ppm. HRMS (ESI<sup>+</sup>) calcd for  $\text{C}_{28}\text{H}_{31}\text{O}$  [ $\text{M}+\text{H}$ ]<sup>+</sup> 383.2369, found 383.2377. IR (KBr): 2956, 2905, 2850, 1602, 1498, 1460, 1235, 1140, 1032, 877, 807  $\text{cm}^{-1}$ .

## VII. Sequential methylation of 1-fluoro-4-nitronaphthalene.

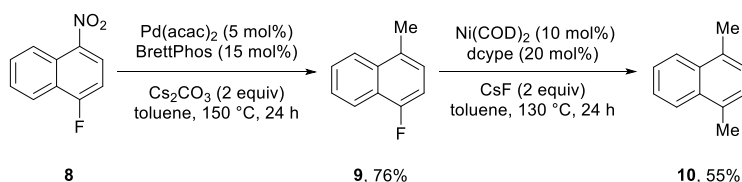

1-Fluoro-4-nitronaphthalene (**8**) was prepared according to the literature.<sup>25</sup>

An oven-dried vial equipped with a stirring bar was charged with **8** (76.4 mg, 0.4 mmol), TMB (200  $\mu\text{L}$ , 3.5*N* in THF, 1.75 equiv),  $\text{Pd}(\text{acac})_2$  (6.2 mg, 5 mol%), BrettPhos (32.2 mg, 15 mol%),  $\text{Cs}_2\text{CO}_3$  (260 mg, 2 equiv) and toluene (1.2 mL) under  $\text{N}_2$  at room temperature. The reaction mixture was placed in a preheated oil bath at 150  $^\circ\text{C}$ , and stirred for 24 h. Then the reaction mixture was cooled down to room temperature, diluted with  $\text{CH}_2\text{Cl}_2$  (20 mL), filtered through celite, and concentrated under reduced pressure. Purification by column chromatography on silica gel (200-300 mesh) afforded the corresponding product **9** as colorless oil (49 mg, 76% yield).  $^1\text{H}$  NMR (400 MHz,  $\text{CDCl}_3$ ):  $\delta$  = 2.65 (s, 3H), 6.98 – 7.08 (m, 1H), 7.18 – 7.25 (m, 1H), 7.52 – 7.62 (m, 2H), 7.95 – 8.01 (m, 1H), 8.10 – 8.18 (m, 1H) ppm.  $^{13}\text{C}$  NMR (100 MHz,  $\text{CDCl}_3$ ):  $\delta$  = 19.1, 108.92 (d,  $J$  = 19.5 Hz), 121.15 (d,  $J$  = 5.6 Hz), 123.85 (d,  $J$  = 16.4 Hz), 124.34 (d,  $J$  = 2.7 Hz), 125.9, 125.97 (d,  $J$  = 5.6 Hz), 126.74 (d,  $J$  = 1.0 Hz), 130.06 (d,  $J$  = 4.8 Hz), 133.68 (d,  $J$  = 4.4 Hz), 157.64 (d,  $J$  = 249.1 Hz) ppm.  $^{19}\text{F}$  NMR (376 MHz,  $\text{CDCl}_3$ ):  $\delta$  = -126.50 ppm. HRMS (ESI<sup>+</sup>) calcd for  $\text{C}_{11}\text{H}_9\text{FNa}$  [ $\text{M}+\text{Na}$ ]<sup>+</sup> 183.0580, found 183.0581. IR (KBr): 2927, 2866, 1601, 1466, 1397, 1225, 1050, 819, 760, 731  $\text{cm}^{-1}$ .



An oven-dried vial equipped with a stirring bar was charged with **9** (32 mg, 0.2 mmol), TMB (100  $\mu$ L, 3.5*N* in THF, 1.75 equiv), Ni(COD)<sub>2</sub> (5.5 mg, 10 mol%), dcype (17 mg, 20 mol%), CsF (61 mg, 2.0 equiv) and toluene (0.6 mL) under N<sub>2</sub> at room temperature. The reaction mixture was placed in a preheated oil bath at 130 °C, and stirred for 24 h. The reaction mixture was then cooled down to room temperature, diluted with CH<sub>2</sub>Cl<sub>2</sub> (10 mL), filtered through celite, and concentrated. Purification by column chromatography on silica gel (200-300 mesh, petroleum ether) afforded the corresponding product **10** colorless oil (17 mg, 55% yield). <sup>1</sup>H NMR (400 MHz, CDCl<sub>3</sub>):  $\delta$  = 2.67 (s, 6H), 7.22 (s, 2H), 7.54 (dd, *J* = 6.4, 3.2 Hz, 2H), 8.02 (dd, *J* = 6.4, 3.2 Hz, 2H) ppm. <sup>13</sup>C NMR (100 MHz, CDCl<sub>3</sub>):  $\delta$  = 19.5, 124.8, 125.5, 126.4, 132.5, 132.8 ppm. The NMR spectra are in accordance with literature.<sup>26</sup>

### VIII. Synthetic applications of catalytic methylation of unconventional aryl electrophiles

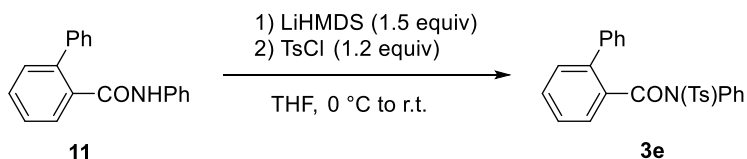

***N*-phenyl-*N*-tosyl-(1,1'-biphenyl)-2-carboxamide (3e):** *N*-phenyl-(1,1'-biphenyl)-2-carboxamide **11** (137 mg, 0.5 mmol) was dissolved in THF (2.5 mL). LiHMDS (1 mol/L in THF, 0.75 mL, 1.5 equiv) was added slowly at 0 °C under N<sub>2</sub>. After stirring at 0 °C for 1 h, TsCl (114 mg, 1.2 equiv) was added slowly. Then the reaction mixture was quenched by water after further stirring at room temperature for 15 h. The mixture was sequentially washed with 1 *N* HCl (2 mL), saturated aqueous NaHCO<sub>3</sub> (2 mL), and brine (2 mL). The organic layer was dried over Na<sub>2</sub>SO<sub>4</sub>, filtered and concentrated under reduced pressure. The resulting crude mixture was purified by column chromatography on silica gel (200-300 mesh) to afford **3e** as a white solid (182 mg, 85% yield).

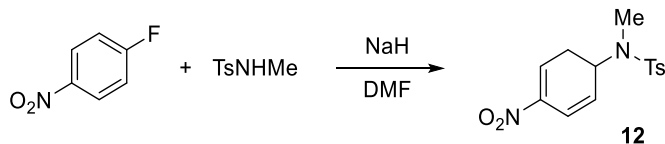

***N*,4-dimethyl-*N*-(4-nitrophenyl)benzenesulfonamide (12):** An oven-dried vial equipped with a stirring bar was charged with *N*-methyl-*p*-toluenesulfonamide (1.85 g, 10 mmol) and DMF (15 mL) under N<sub>2</sub>. NaH (440 mg, 11 mmol) was added in portions at room temperature. The reaction mixture was stirred for 1 h. Then, *p*-fluoronitrobenzene (1.17 mL, 11 mmol) was added and the reaction mixture was stirred for another 1 h. The reaction was then quenched with water (30 mL) and extracted with EtOAc (50 mL $\times$ 2). Purification by chromatography on silica gel (200-300 mesh,

petroleum ether/ CH<sub>2</sub>Cl<sub>2</sub> = 2/1) afforded the corresponding product **12** as a yellowish solid (2.75 g, 90% yield). <sup>1</sup>H NMR (400 MHz, CDCl<sub>3</sub>): δ = 2.42 (s, 3H), 3.22 (s, 3H), 7.24 – 7.28 (m, 2H), 7.31 – 7.35 (m, 2H), 7.39 – 7.44 (m, 2H), 8.14 – 8.20 (m, 2H) ppm. <sup>13</sup>C NMR (100 MHz, CDCl<sub>3</sub>): δ = 21.7, 37.6, 124.4, 125.7, 127.7, 129.9, 132.9, 144.6, 145.7, 147.5 ppm. HRMS (ESI<sup>+</sup>) calcd for C<sub>14</sub>H<sub>14</sub>N<sub>2</sub>NaO<sub>4</sub>S [M+Na]<sup>+</sup> 329.0566, found 329.0566. IR (KBr): 3080, 2900, 1592, 1521, 1492, 1348, 1170, 1054, 872, 721, 665 cm<sup>-1</sup>.

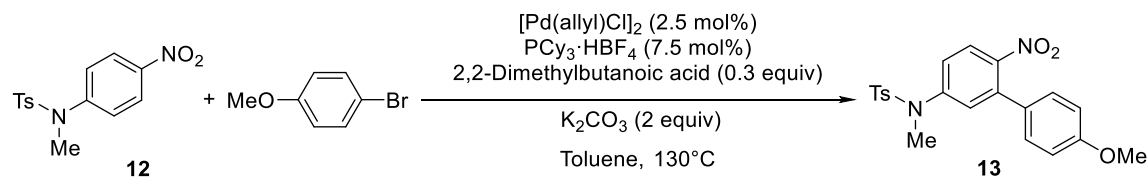

***N*-(4'-methoxy-6-nitro-[1,1'-biphenyl]-3-yl)-*N*,4-dimethylbenzenesulfonamide (**13**):** Compound **13** was synthesized by a modified procedure of literature.<sup>27</sup> An oven-dried vial equipped with a stirring bar was charged with nitroaromatic **12** (4 mmol, 2.0 equiv), 4-bromoanisole (250 μL, 2 mmol, 1.0 equiv), [Pd(allyl)Cl]<sub>2</sub> (19 mg, 2.5 mol%), PCy<sub>3</sub>·HBF<sub>4</sub> (55 mg, 7.5 mol%), 2,2-dimethylbutanoic acid (DMBA, 75 μL, 0.3 equiv) and K<sub>2</sub>CO<sub>3</sub> (550 mg, 2.0 equiv) under N<sub>2</sub>. Toluene (5 mL) was added at room temperature. The reaction mixture was placed in a preheated oil bath at 130 °C, and stirred for 24 h. The reaction mixture was then cooled down to room temperature, diluted with CH<sub>2</sub>Cl<sub>2</sub> (50 mL), filtered through celite, and concentrated. Purification by chromatography on silica gel (200-300 mesh, petroleum ether/ CH<sub>2</sub>Cl<sub>2</sub>/EtOAc = 20/4/1) afforded the corresponding product **13** as a yellowish solid. (594 mg, 72% yield) <sup>1</sup>H NMR (400 MHz, CDCl<sub>3</sub>): δ = 2.43 (s, 3H), 3.20 (s, 3H), 3.84 (s, 3H), 6.91 – 6.96 (m, 2H), 7.15 – 7.22 (m, 4H), 7.29 (d, *J* = 7.9 Hz, 2H), 7.47 (d, *J* = 8.3 Hz, 2H), 7.75 – 7.79 (m, 1H) ppm. <sup>13</sup>C NMR (100 MHz, CDCl<sub>3</sub>): δ = 21.8, 37.7, 55.5, 114.4, 124.4, 125.1, 127.9, 128.9, 128.9, 129.2, 129.8, 133.1, 137.0, 144.5, 145.0, 147.0, 160.0 ppm. HRMS (ESI<sup>+</sup>) calcd for C<sub>21</sub>H<sub>20</sub>N<sub>2</sub>NaO<sub>5</sub>S [M+Na]<sup>+</sup> 435.0985, found 435.0982. IR (KBr): 2926, 2853, 1612, 1515, 1347, 1255, 1169, 901, 746, 663 cm<sup>-1</sup>.

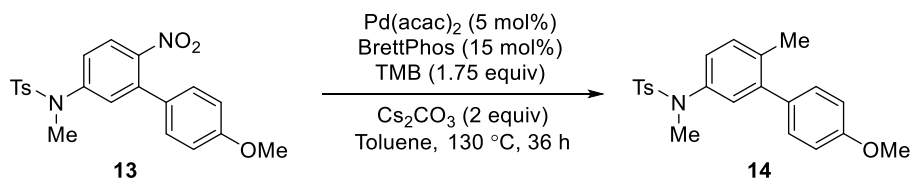

***N*-(4'-methoxy-6-methyl-[1,1'-biphenyl]-3-yl)-*N*,4-dimethylbenzenesulfonamide (**14**):** Compound **14** was synthesized according to the general methylation procedure of nitro group from **13**. The reaction was conducted at 130 °C for 36 h. The corresponding product **14** was obtained as yellowish oil. (27 mg, 35% yield) <sup>1</sup>H NMR (400 MHz, CDCl<sub>3</sub>) δ = 2.25 (s, 3H), 2.43 (s, 3H), 3.14 (s, 3H), 3.84 (s, 3H), 6.83 (d, *J* = 2.3 Hz, 1H), 6.92 (d, *J* = 8.8 Hz, 2H), 7.02 (dd, *J* = 8.0, 2.4

Hz, 1H), 7.13 (d,  $J = 8.8$  Hz, 2H), 7.18 (d,  $J = 8.4$  Hz, 1H), 7.25 – 7.28 (m, 2H, overlapped), 7.48 (d,  $J = 8.4$  Hz, 2H) ppm.  $^{13}\text{C}$  NMR (100 MHz,  $\text{CDCl}_3$ )  $\delta = 20.3, 21.7, 38.4, 55.5, 113.6, 125.7, 127.8, 128.2, 129.4, 130.3, 130.9, 133.5, 133.8, 135.0, 139.4, 142.1, 143.6, 158.8$  ppm. HRMS (ESI<sup>+</sup>) calcd for  $\text{C}_{22}\text{H}_{23}\text{NNaO}_3\text{S}$  [ $\text{M}+\text{Na}$ ]<sup>+</sup> 404.1291, found 404.1292. IR (KBr): 2960, 2923, 2848, 1655, 1631, 1469, 1262, 1022, 807, 721, 669  $\text{cm}^{-1}$ .

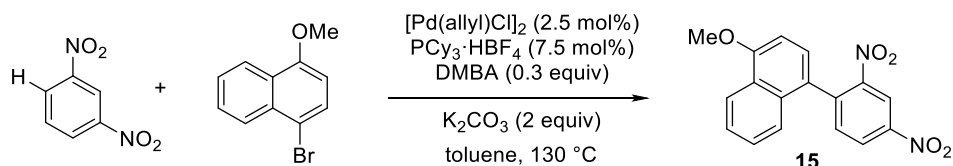

**1-(2,4-Dinitrophenyl)-4-methoxynaphthalene (15):** Compound **15** was synthesized by a modified procedure of literature.<sup>27</sup> An oven-dried vial equipped with a stirring bar was charged with 1,3-dinitrobenzene (504 mg, 4 mmol, 2.0 equiv), 1-bromo-4-methoxynaphthalene (474 mg, 2 mmol, 1.0 equiv),  $[\text{Pd}(\text{allyl})\text{Cl}]_2$  (19 mg, 2.5 mol%),  $\text{PCy}_3\cdot\text{HBF}_4$  (55 mg, 7.5 mol%), 2,2-dimethylbutanoic acid (75  $\mu\text{L}$ , 0.3 equiv) and  $\text{K}_2\text{CO}_3$  (550 mg, 2.0 equiv) under  $\text{N}_2$ . Toluene (5 mL) was added at room temperature. The reaction mixture was placed in a preheated oil bath at 130  $^\circ\text{C}$ , and stirred for 24 h. The reaction mixture was then cooled down to room temperature, diluted with  $\text{CH}_2\text{Cl}_2$  (50 mL), filtered through celite, and concentrated. Purification by chromatography on silica gel (200–300 mesh, petroleum ether/  $\text{CH}_2\text{Cl}_2 = 2/1$ ) afforded the corresponding product **15** as a red solid (337 mg, 52% yield).  $^1\text{H}$  NMR (400 MHz,  $\text{CDCl}_3$ ):  $\delta = 4.06$  (s, 3H), 6.88 (d,  $J = 8.0$  Hz, 1H), 7.27 (d,  $J = 8.0$  Hz, 1H), 7.35 (d,  $J = 8.0$  Hz, 1H), 7.44 – 7.49 (m, 1H), 7.50 – 7.55 (m, 1H), 7.73 (d,  $J = 8.4$  Hz, 1H), 8.37 (d,  $J = 9.2$  Hz, 1H), 8.52 (dd,  $J = 8.4, 2.4$  Hz, 1H), 8.86 (d,  $J = 2.4$  Hz, 1H) ppm.  $^{13}\text{C}$  NMR (100 MHz,  $\text{CDCl}_3$ ):  $\delta = 55.8, 103.4, 119.9, 123.0, 124.0, 125.3, 125.8, 126.0, 126.6, 126.8, 127.8, 131.8, 135.0, 141.9, 147.2, 150.3, 156.8$ . ppm. HRMS (ESI<sup>+</sup>) calcd for  $\text{C}_{17}\text{H}_{13}\text{N}_2\text{O}_5$  [ $\text{M}+\text{H}$ ]<sup>+</sup> 325.0819, found 325.0818. IR (KBr): 3111, 2945, 2841, 1590, 1515, 1341, 1253, 1106, 1084, 815, 772, 740  $\text{cm}^{-1}$ .

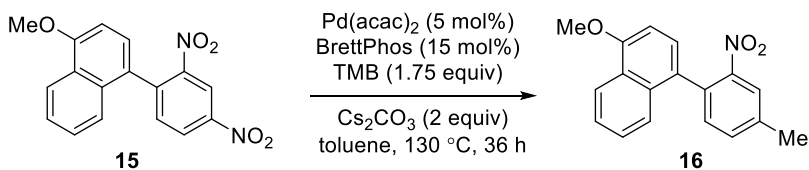

**1-Methoxy-4-(4-methyl-2-nitrophenyl)naphthalene (16):** Compound **16** was synthesized according to the general methylation procedure of nitro group from **15**. The reaction was conducted at 130  $^\circ\text{C}$  for 36 h. The corresponding product **15** was obtained as a yellow solid (26 mg, 44% yield).  $^1\text{H}$  NMR (400 MHz,  $\text{CDCl}_3$ )  $\delta = 2.53$  (s, 3H), 4.04 (s, 3H), 6.84 (d,  $J = 8.0$  Hz, 1H), 7.23

(d,  $J = 8.0$  Hz, 1H), 7.35 (d,  $J = 8.0$  Hz, 1H), 7.39 – 7.44 (m, 2H), 7.44 – 7.51 (m, 2H), 7.83 (s, 1H), 8.33 (d,  $J = 8.4$  Hz, 1H) ppm.  $^{13}\text{C}$  NMR (100 MHz,  $\text{CDCl}_3$ )  $\delta = 21.1, 55.7, 103.4, 122.6, 124.6, 124.8, 125.4, 125.7, 126.4, 127.1, 127.7, 132.5, 132.7, 133.3, 133.4, 139.0, 150.2, 155.7$  ppm. HRMS (ESI<sup>+</sup>) calcd for  $\text{C}_{18}\text{H}_{15}\text{NNaO}_3$   $[\text{M}+\text{Na}]^+$  316.0944, found 316.0947. IR (KBr): 2924, 2850, 1580, 1517, 1464, 1341, 1254, 1087, 817, 767  $\text{cm}^{-1}$ .

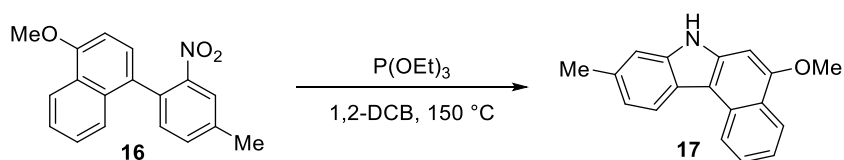

**5-Methoxy-9-methyl-7H-benzo[c]carbazole (17):** Compound **17** was synthesized by Cadogen-type reaction. An oven-dried vial equipped with a stirring bar was charged with nitroaromatic **16** (15 mg, 0.05 mmol, 1.0 equiv) under  $\text{N}_2$ . A mixture of  $\text{P}(\text{OEt})_3$  and 1,2-dichlorobenzene (v/v = 1/1, 0.3 mL) was added at room temperature. The reaction mixture was placed in a preheated oil bath at 150 °C, and stirred for 12 h. The reaction mixture was then cooled down to room temperature, diluted with  $\text{CH}_2\text{Cl}_2$  (10 mL), filtered through celite, and concentrated. Purification by chromatography on silica gel (200-300 mesh, petroleum ether/  $\text{CH}_2\text{Cl}_2 = 2/1$ ) afforded the corresponding product **17** as a white solid (13 mg, 98% yield).  $^1\text{H}$  NMR (400 MHz,  $\text{CDCl}_3$ )  $\delta = 2.55$  (s, 3H), 4.03 (s, 3H), 6.83 (s, 1H), 7.18 (d,  $J = 8.1$  Hz, 1H), 7.23 (s, 1H), 7.43 – 7.50 (m, 1H), 7.66 – 7.74 (m, 1H), 8.05 (br s, 1H), 8.31 (d,  $J = 8.1$  Hz, 1H), 8.39 (d,  $J = 8.3$  Hz, 1H), 8.66 (d,  $J = 8.3$  Hz, 1H) ppm.  $^{13}\text{C}$  NMR (100 MHz,  $\text{CDCl}_3$ )  $\delta = 22.0, 55.9, 91.6, 109.4, 111.1, 120.7, 121.8, 122.2, 122.3, 122.5, 123.2, 123.4, 127.5, 130.3, 133.0, 137.6, 138.8, 155.2$  ppm. HRMS (ESI<sup>+</sup>) calcd for  $\text{C}_{18}\text{H}_{15}\text{NO}$   $[\text{M}]^+$  261.1148, found 261.1156. IR (KBr): 3360, 2963, 2921, 2853, 2142, 1586, 1512, 1462, 1389, 1260, 1027, 968, 797, 766  $\text{cm}^{-1}$ .

## IX. Mechanistic studies

### 8.1 General procedure for competition experiments

An oven-dried vial equipped with a stirring bar was charged with two substrates (0.2 mmol, 1.0 equiv), TMB (100  $\mu\text{L}$ , 3.5*N* in THF, 3.5 mmol, 1.75 equiv), catalyst, ligand and base (0.4 mmol, 2.0 equiv), placed under a positive pressure of  $\text{N}_2$ . Solvent (0.6 mL) was added at room temperature. The reaction mixture was placed in a preheated oil bath at 160 °C, and stirred for 4h. The reaction mixture was then cooled down to room temperature. Diphenylacetylene (35.6 mg, 0.2 mmol) and mesitylene (27.8  $\mu\text{L}$ , 0.2 mmol) were subjected to the reaction mixture as the internal standard. The yields of **2f** and **2h** were separately

determined by GC analysis using diphenylacetylene and mesitylene as the internal standard, respectively.

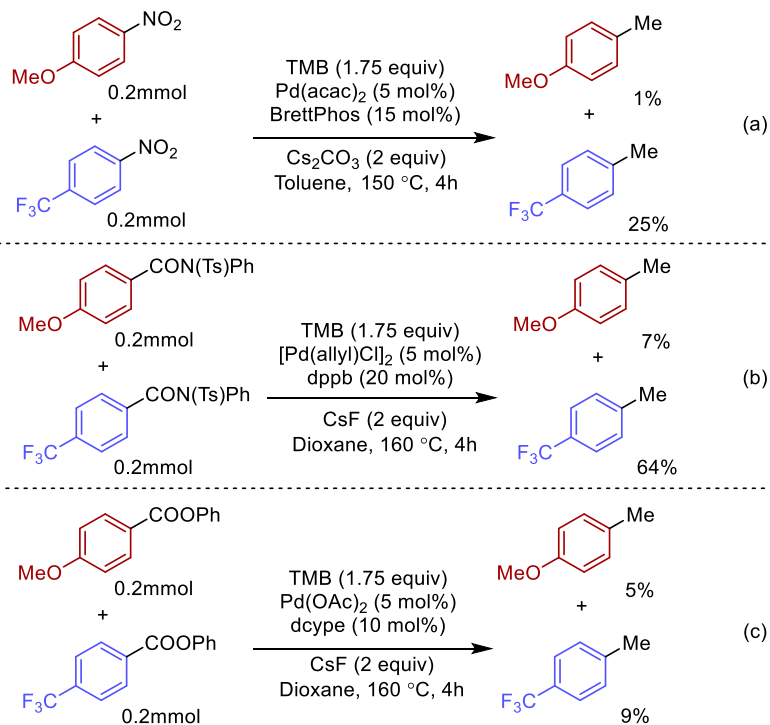

**Scheme S4** Competition experiments.

## 8.2 Competition experiment for denitrative methylation

The yield of **2f** was determined by GC analysis using calibration curves based on data from the authentic sample of **2f** and diphenylacetylene (1% yield).

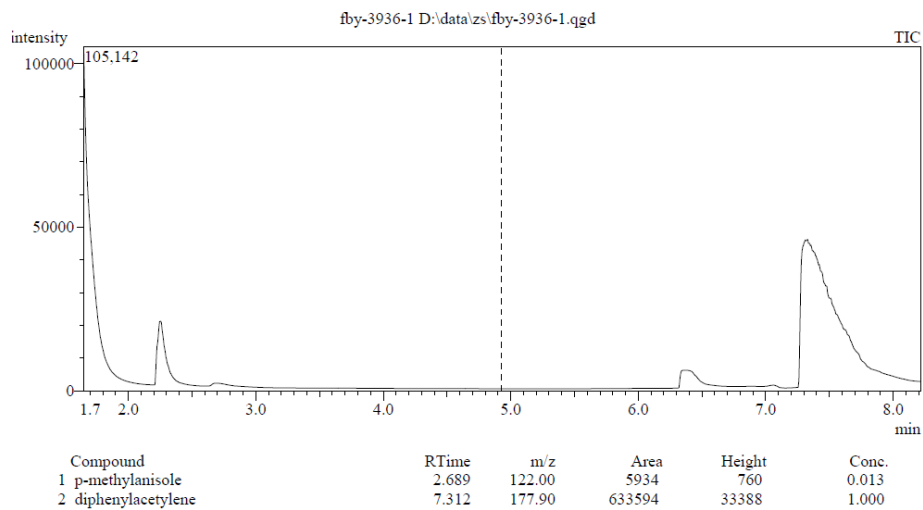

ID#:1 m/z:122.00 Name:p-methylanisole  
 $f(x)=0.709868*x+0.000000$   
 $r1=0.999478$   $r2=0.998957$   
 MeanRF:0.68 RFRSD:0.06 RFRSD:8.97  
 CurveType:Least square  
 ZeroThrough:Yes  
 WeightedRegression:No  
 Internal Standard

Calibration Curve

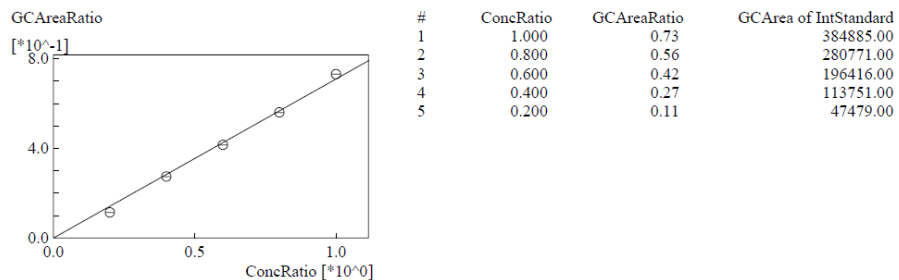

The yield of **2h** was determined by GC analysis using calibration curves based on data from the authentic sample of **2h** and mesitylene (25% yield).

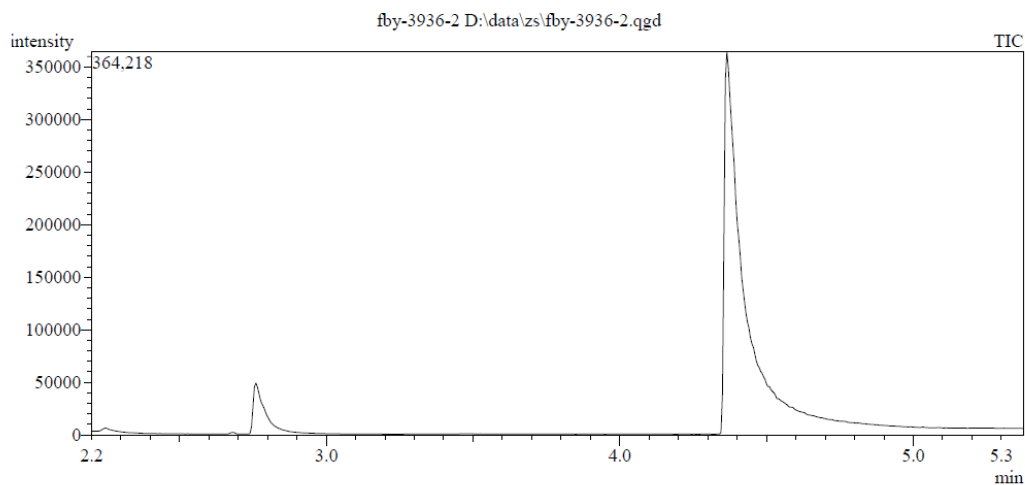

| Compound                      | RTime | m/z    | Area   | Height | Conc. |
|-------------------------------|-------|--------|--------|--------|-------|
| 1 4-(trifluoromethyl)-toluene | 2.761 | 159.90 | 78365  | 29245  | 0.252 |
| 2 Mes                         | 4.367 | 120.00 | 441349 | 107588 | 1.000 |

Calibration Curve

ID#:1 m/z:159.90 Name:4-(trifluoromethyl)-toluene  
 $f(x)=0.705366*x+0.000000$   
 $r1=0.986979$   $r2=0.974128$   
 MeanRF:0.68 RFSD:0.07 RFRSD:9.64  
 CurveType:Least square  
 ZeroThrough:Yes  
 WeightedRegression:No  
 Internal Standard

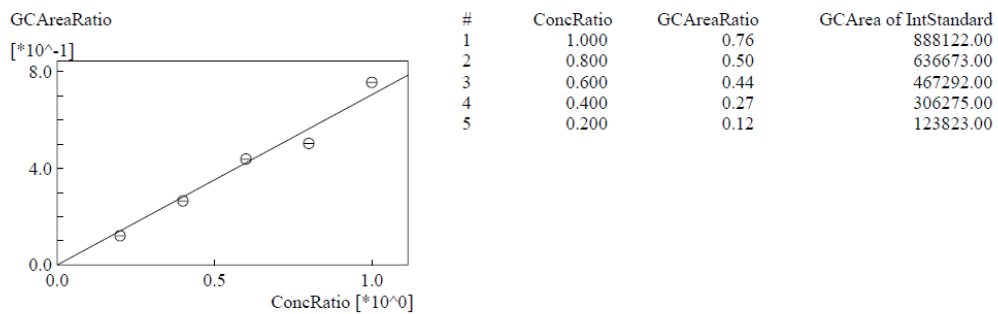

### 8.3 Competition experiment for decarbonylative methylation of amide

The yield of **2f** was determined by GC analysis using calibration curves based on data from the authentic sample of **2f** and diphenylacetylene (7% yield).

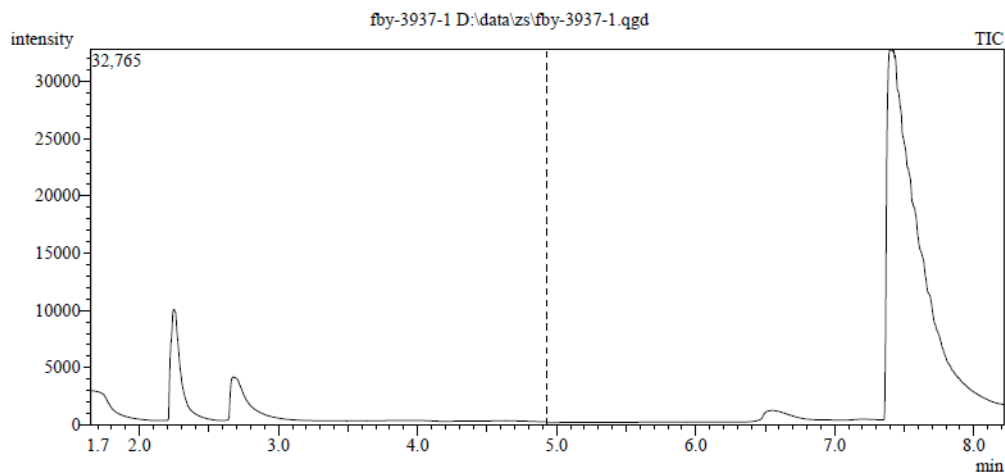

| Compound            | RTime | m/z    | Area   | Height | Conc. |
|---------------------|-------|--------|--------|--------|-------|
| 1 p-methylanisole   | 2.677 | 122.00 | 17771  | 2199   | 0.074 |
| 2 diphenylacetylene | 7.402 | 177.90 | 339008 | 24123  | 1.000 |

ID#:1 m/z:122.00 Name:p-methylanisole  
 $f(x)=0.709868*x+0.000000$   
 $rr1=0.999478$   $rr2=0.998957$   
 MeanRF:0.68 RFSD:0.06 RFRSD:8.97  
 CurveType:Least square  
 ZeroThrough:Yes  
 WeightedRegression:No  
 Internal Standard

Calibration Curve

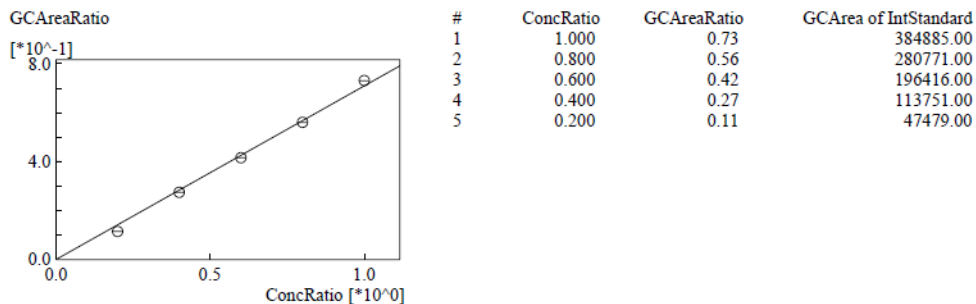



The yield of **2h** was determined by GC analysis using calibration curves based on data from the authentic sample of **2h** and mesitylene (64% yield).

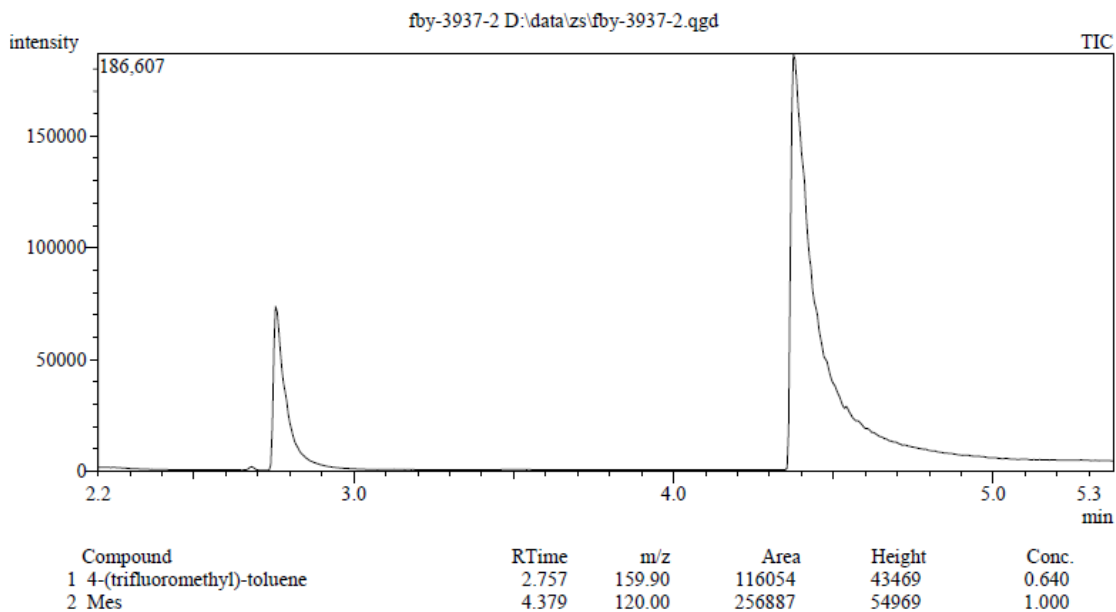

Calibration Curve

ID#:1 m/z:159.90 Name:4-(trifluoromethyl)-toluene  
 $f(x)=0.705366*x+0.000000$   
 $r1=0.986979$   $r2=0.974128$   
MeanRF:0.68 RFSD:0.07 RFRSD:9.64  
CurveType:Least square  
ZeroThrough:Yes  
WeightedRegression:No  
Internal Standard

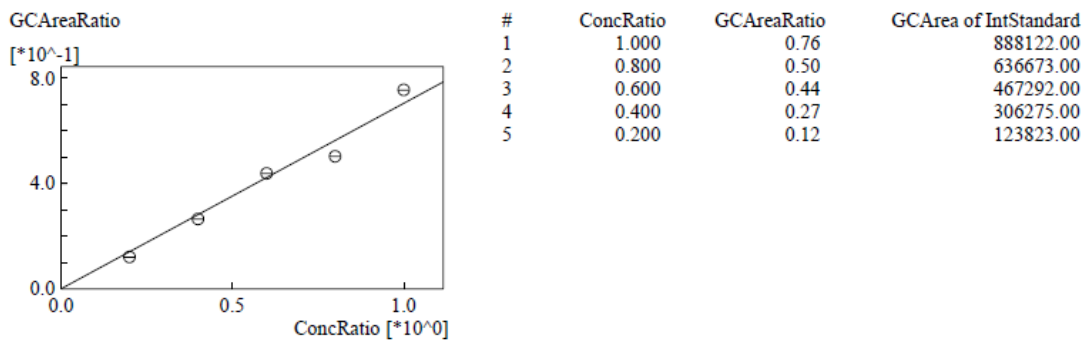

## 8.4 Competition experiment for decarbonylative methylation of ester

The yield of **2f** was determined by GC analysis using calibration curves based on data from the authentic sample of **2f** and diphenylacetylene (5% yield).

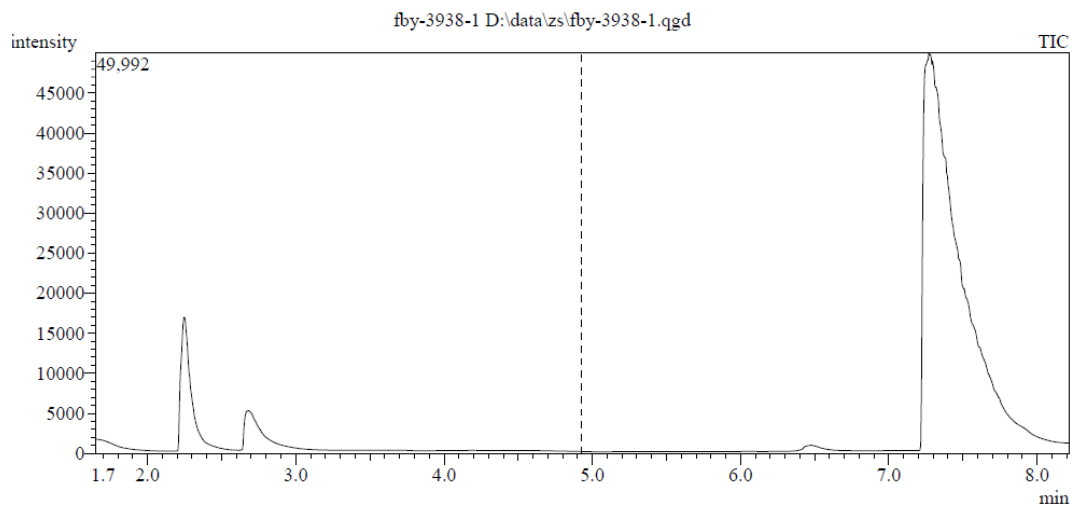

| Compound            | RTime | m/z    | Area   | Height | Conc. |
|---------------------|-------|--------|--------|--------|-------|
| 1 p-methylanisole   | 2.683 | 122.00 | 21925  | 2860   | 0.053 |
| 2 diphenylacetylene | 7.274 | 177.90 | 581143 | 36994  | 1.000 |

ID#:1 m/z:122.00 Name:p-methylanisole  
 $f(x)=0.709868*x+0.000000$   
 $r1=0.999478$   $r2=0.998957$   
 MeanRF:0.68 RFSD:0.06 RFRSD:8.97  
 CurveType:Least square  
 ZeroThrough:Yes  
 WeightedRegression:No  
 Internal Standard

Calibration Curve

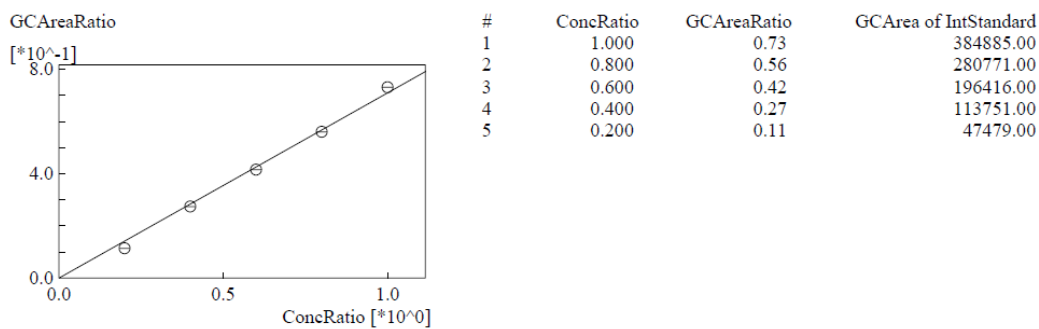

The yield of **2h** was determined by GC analysis using calibration curves based on data from the authentic sample of **2h** and mesitylene (9% yield).

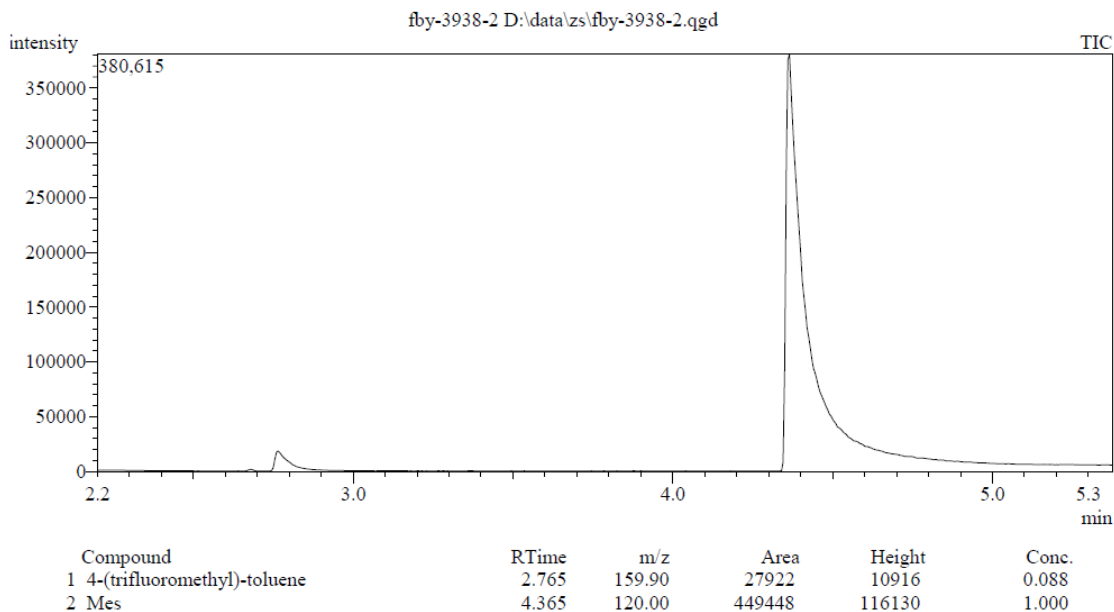

Calibration Curve

ID#:1 m/z:159.90 Name:4-(trifluoromethyl)-toluene  
 $f(x)=0.705366*x+0.000000$   
 $r1=0.986979$   $r2=0.974128$   
 MeanRF:0.68 RFS:0.07 RFRSD:9.64  
 CurveType:Least square  
 ZeroThrough:Yes  
 WeightedRegression:No  
 Internal Standard

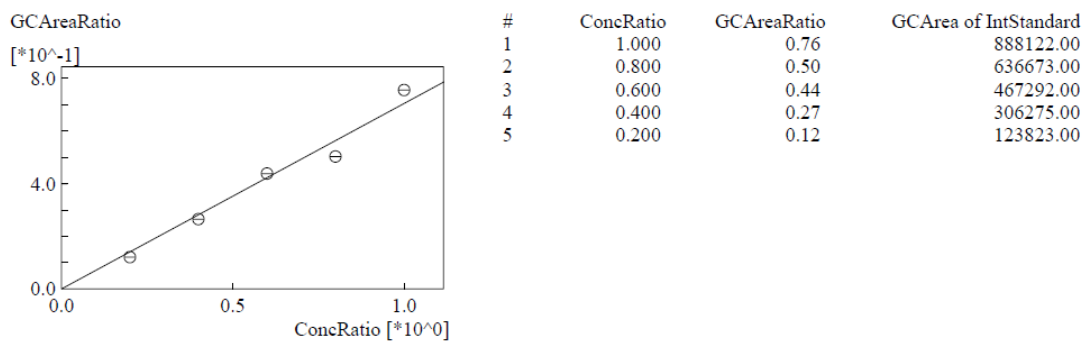

## X. References

- (1) G. Kunstle and H. Siegl, US Pat., 3960909A, 1976.
- (2) B. Feng, Y. Yang and J. You, *Chem. Commun.*, 2020, **56**, 790.
- (3) S.-L. Zhang, Z. Yang, X. Hu and K. Y. Tam, *Bioorg. Med. Chem. Lett.*, 2018, **28**, 3441.

- (4) O. Phuangswai, P. Beswick, S. Ratanabunyong, L. Tabtimmai, P. Suphakun, P. Obounchoey, P. Srisook, N. Horata, I. Chuckowree, S. Hannongbua, S. E. Ward, Kiattawee Choowongkomon and M. P. Gleeson, *Eur. J. Med. Chem.*, 2016, **124**, 896.
- (5) M. J. S. Dewar and E. W. T. Warford, *J. Chem. Soc.*, 1956, 3570.
- (6) J. Frommer, B. Karg, K. Weisz and Sabine Müller, *Org. Biomol. Chem.*, 2018, **16**, 7663.
- (7) Y.-J. Pu, M. Higashidate, K.-i. Nakayama and J. Kido, *J. Mater. Chem.*, 2008, **18**, 4183.
- (8) A. J. Tomson and J. P. Horwitz, *J. Org. Chem.*, 1959, **24**, 2056.
- (9) H. Wu, W. Guo, S. Daniel, Y. Li, C. Liu and Z. Zeng, *Chem. –Eur. J.*, 2018, **24**, 3444.
- (10) X. Li and G. Zou, *Chem. Commun.*, 2015, **51**, 5089.
- (11) J. Chen, Y. Peng, M. Liu, J. Ding, W. Su and H. Wua, *Adv. Synth. Catal.*, 2012, **354**, 2117.
- (12) X. Hua, J. Masson-Makdissi, R. J. Sullivan and S. G. Newman, *Org. Lett.*, 2016, **18**, 5312.
- (13) L. Guo and M. Rueping, *Chem. –Eur. J.*, 2016, **22**, 16787.
- (14) T. Ueda, H. Konishi and K. Manabe, *Org. Lett.*, 2012, **14**, 3100.
- (15) C. Qin, H. Wu, J. Chen, M. Liu, J. Cheng, W. Su and J. Ding, *Org. Lett.*, 2008, **10**, 1537.
- (16) F. Zeng and H. Alper, *Org. Lett.*, 2011, **13**, 2868.
- (17) J. Masson-Makdissi, J. K. Vandavasi and S. G. Newman, *Org. Lett.*, 2018, **20**, 4094.
- (18) T. Morioka, A. Nishizawa, K. Nakamura, M. Tobisu and N. Chatani, *Chem. Lett.*, 2015, **44**, 1729.
- (19) Q. Yao, W. Liu, P. Liu, L. Ren, X. Fang and C.-J. Li, *Eur. J. Org. Chem.*, 2019, 2721.
- (20) S. Zhou, Z. Yang, X. Chen, Y. Li, L. Zhang, H. Fang, W. Wang, X. Zhu and S. Wang, *J. Org. Chem.*, 2015, **80**, 6323.
- (21) D. Zhu and L. Shi, *Chem. Commun.*, 2018, **54**, 9313–9316.
- (22) Q. Wu, S. Han, X. Ren, H. Lu, J. Li, D. Zou, Y. Wu and Y. Wu, *Org. Lett.*, 2018, **20**, 6345.
- (23) Y. Zhu, H. Yan, L. Lu, D. Liu, G. Rong and J. Mao, *J. Org. Chem.*, 2013, **78**, 9898.
- (24) A. M. Haydl and J. F. Hartwig, *Org. Lett.*, 2019, **21**, 1337.
- (25) P. F. Cirillo, A. Hammach, V. Kamhi, N. Moss, P. S. Riska and C. Pargellis, WO Pat. 2004014870A1, 2004.
- (26) L. Martínez-García, R. Lobato, G. Prado, P. Monje, F. J. Sardina and M. R. Paleo, *J. Org. Chem.*, 2019, **84**, 1887.
- (27) L. Caron, L.-C. Campeau and K. Fagnou, *Org. Lett.*, 2008, **10**, 4533.

# XI. Copies of NMR spectra

## <sup>1</sup>H NMR spectra of **1o**:

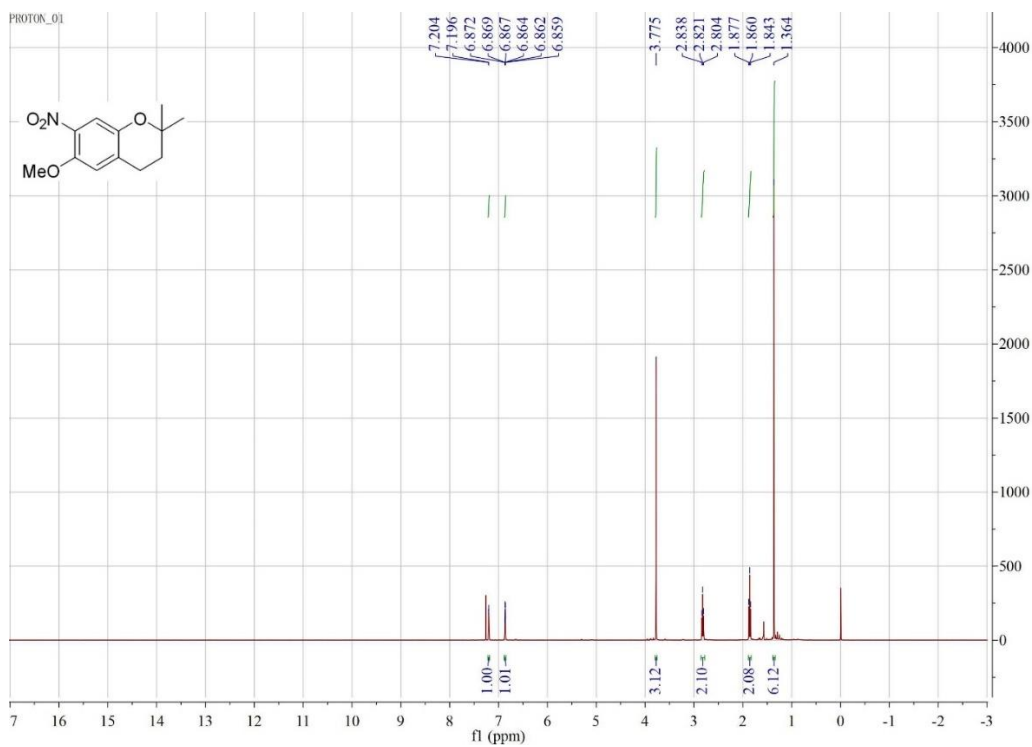

## <sup>13</sup>C NMR spectra of **1o**:

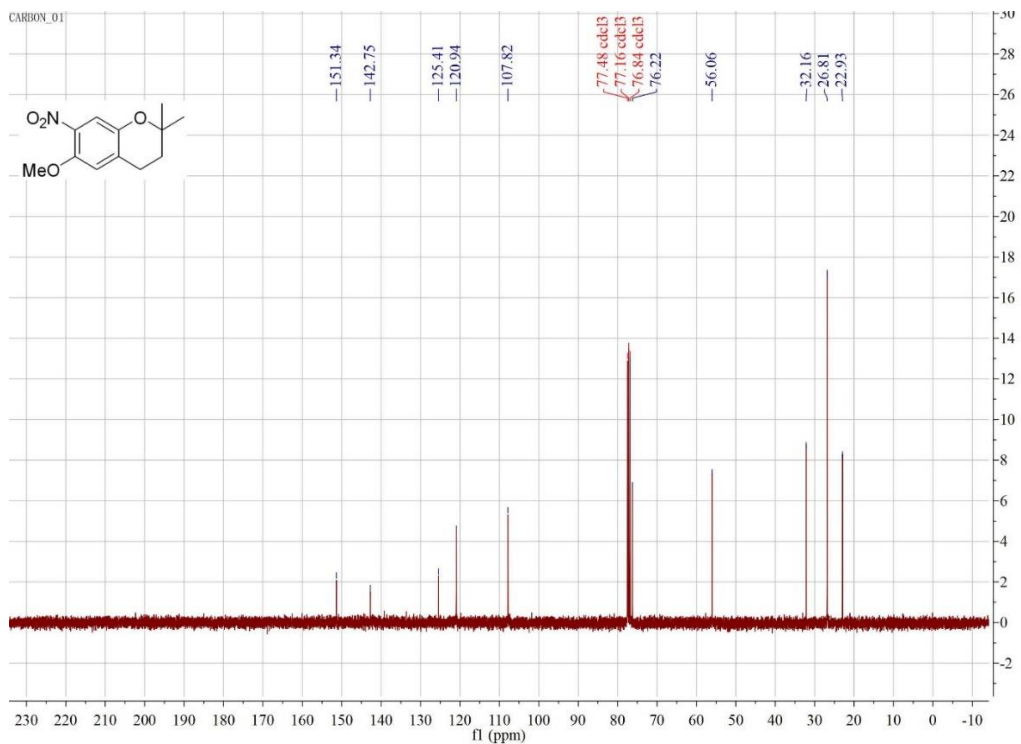

### <sup>1</sup>H NMR spectra of 2a:

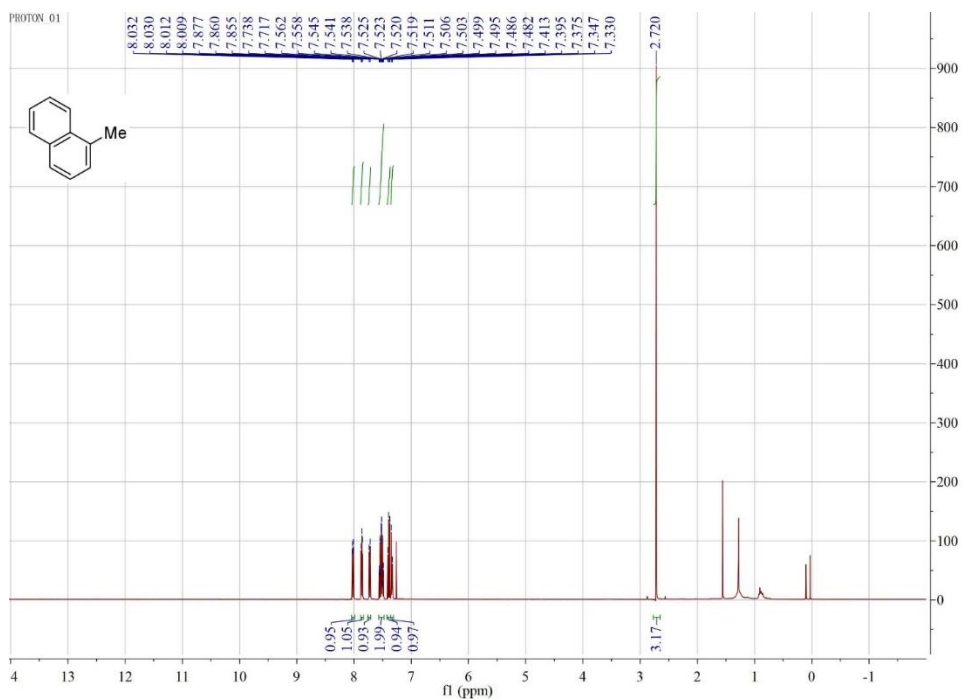

### <sup>13</sup>C NMR spectra of 2a:

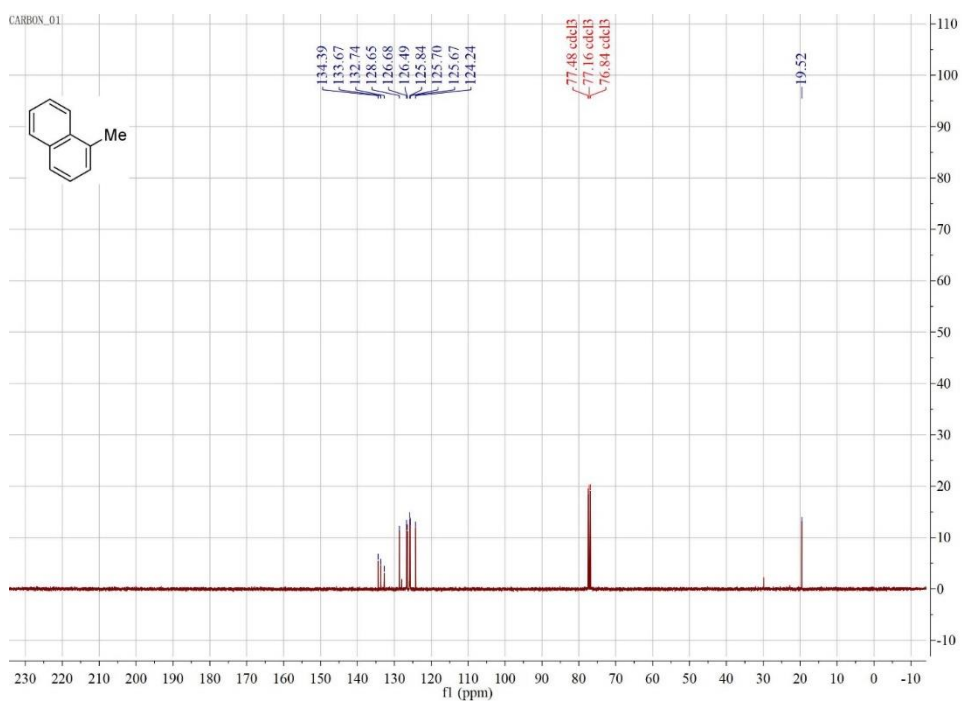

### <sup>1</sup>H NMR spectra of **2b**:

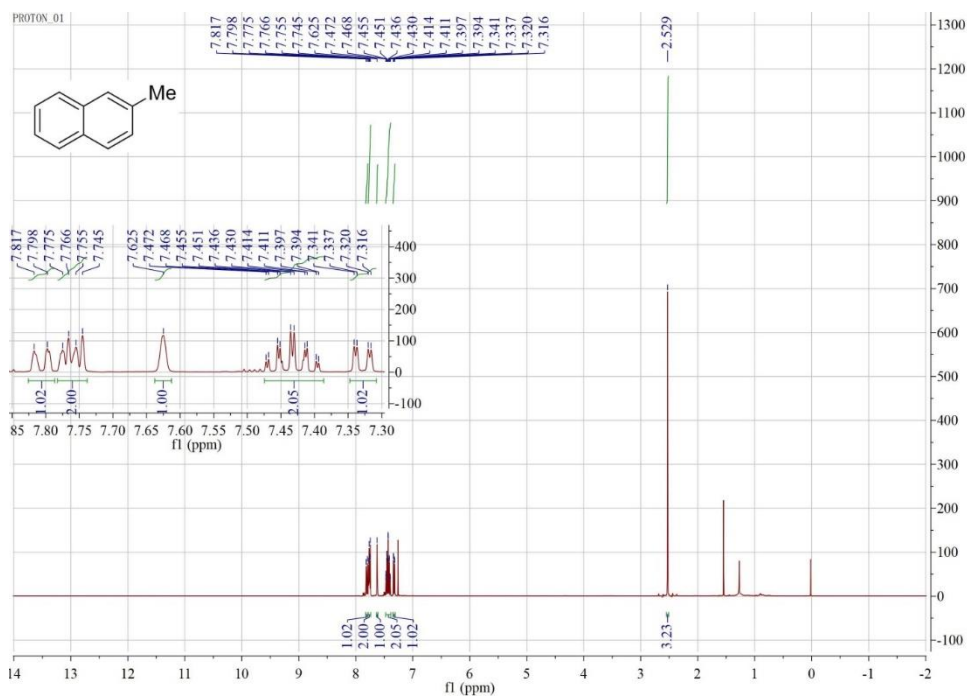

### <sup>13</sup>C NMR spectra of **2b**:

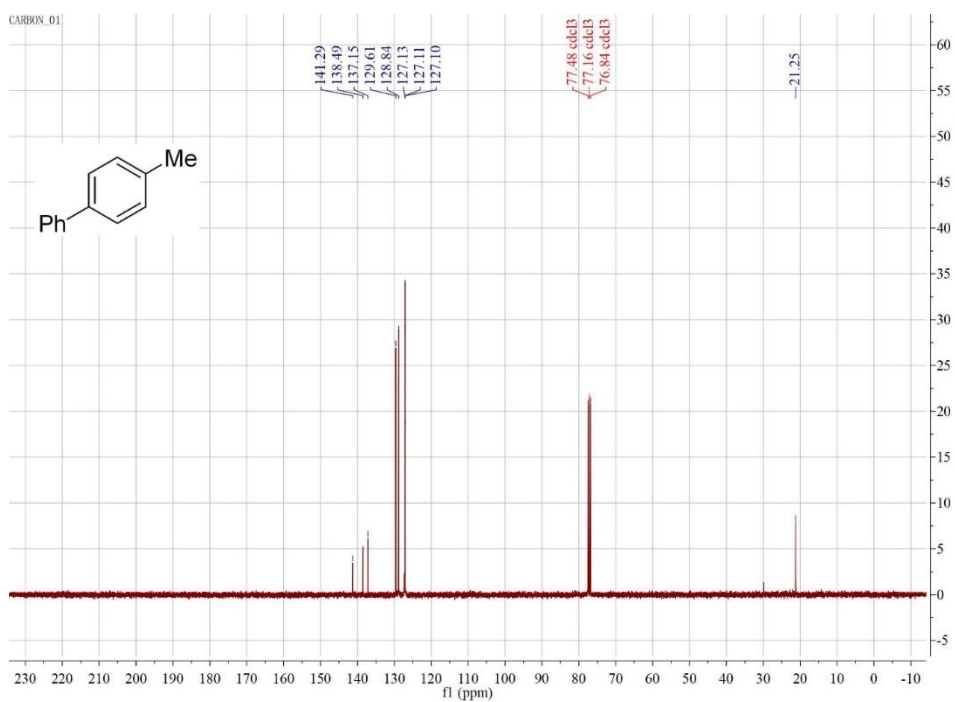

### <sup>1</sup>H NMR spectra of **2c**:

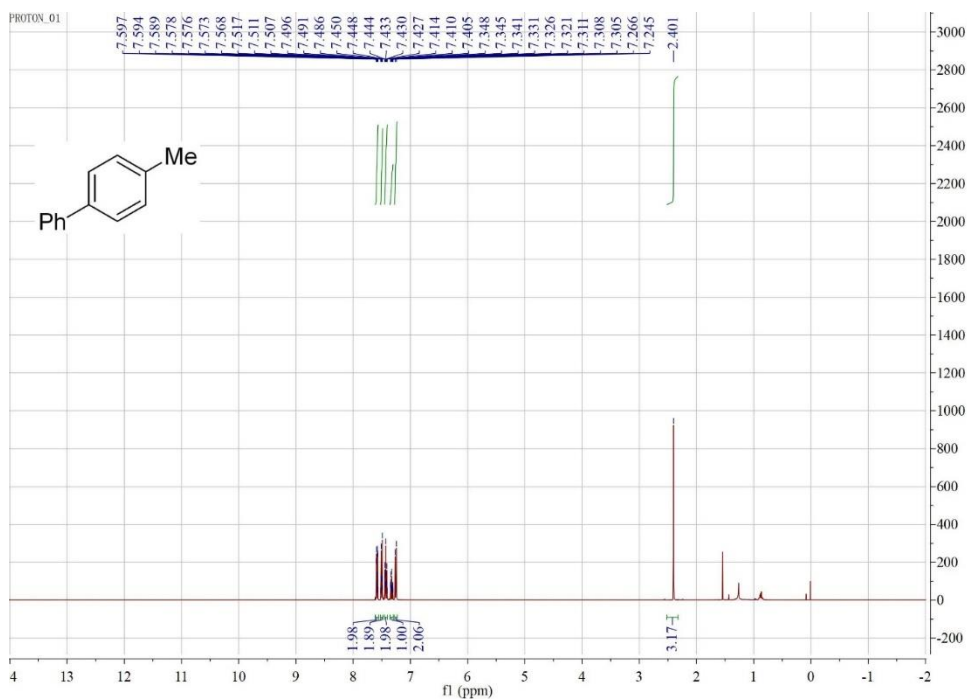

### <sup>13</sup>C NMR spectra of **2c**:

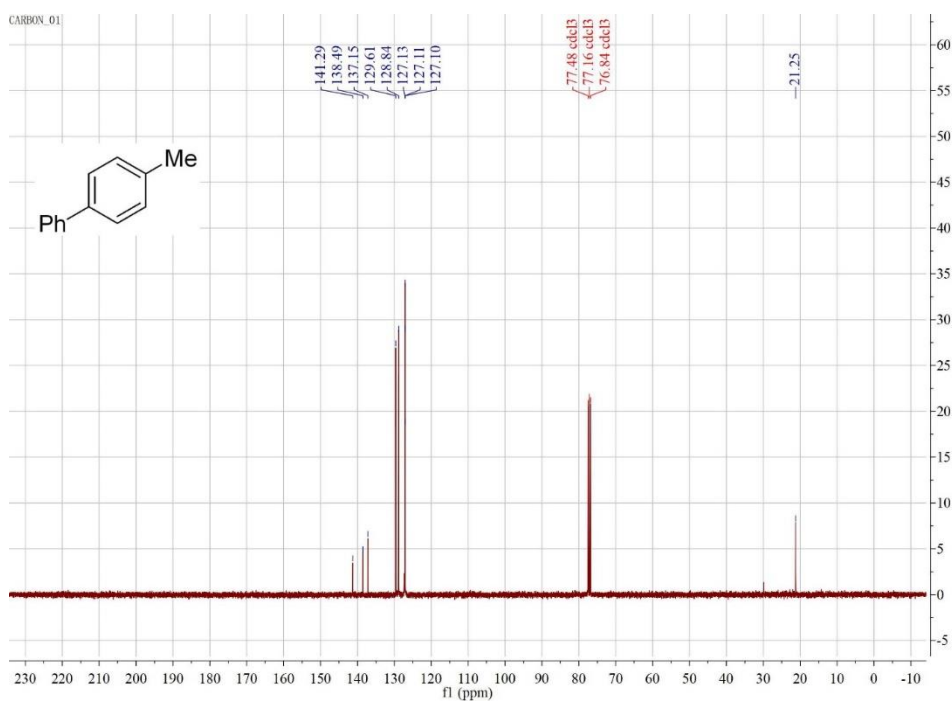



<sup>1</sup>H NMR spectra of **2d**:

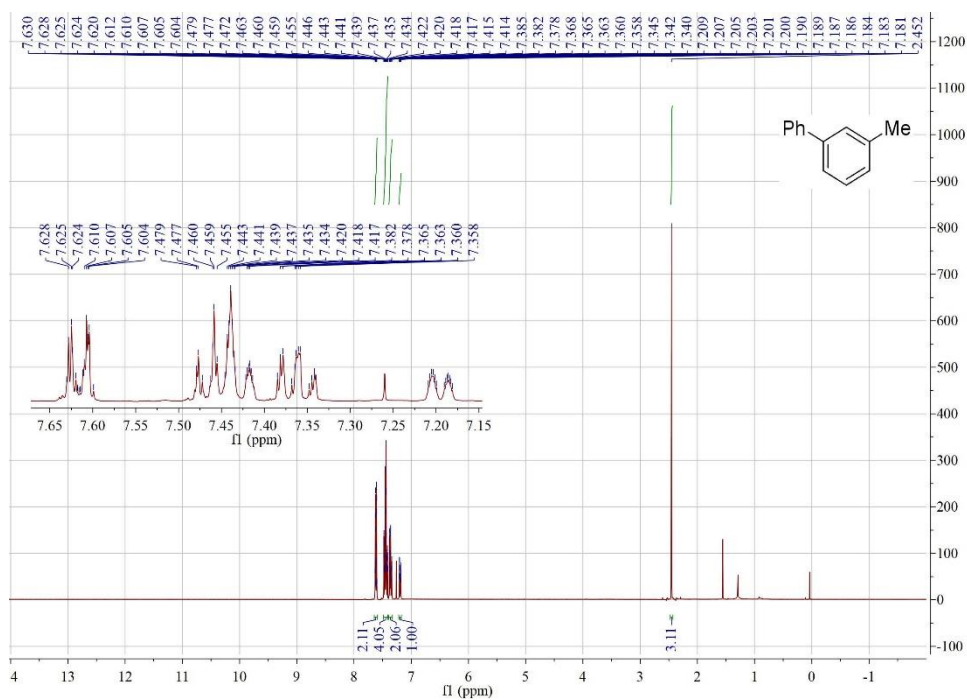

<sup>13</sup>C NMR spectra of **2d**:

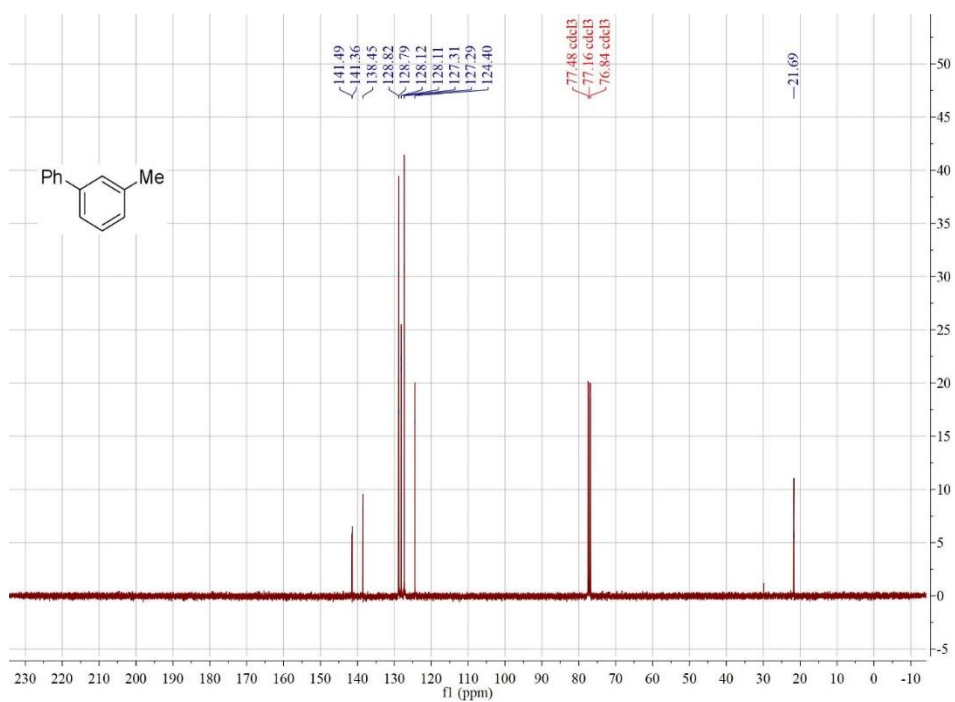

### $^1\text{H}$ NMR spectra of **2e**:

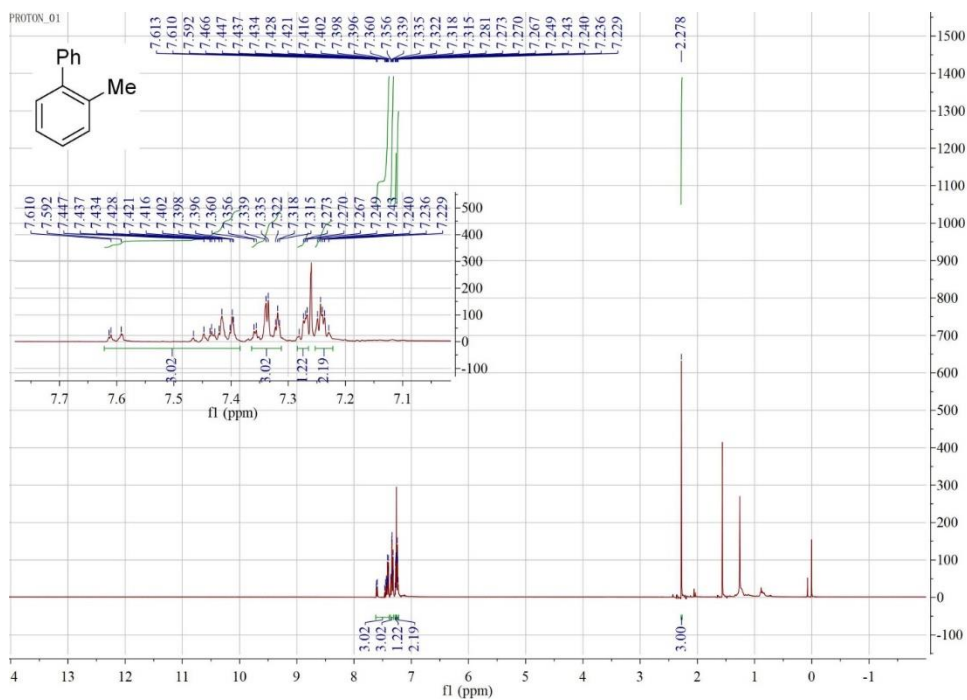

### $^{13}\text{C}$ NMR spectra of **2e**:

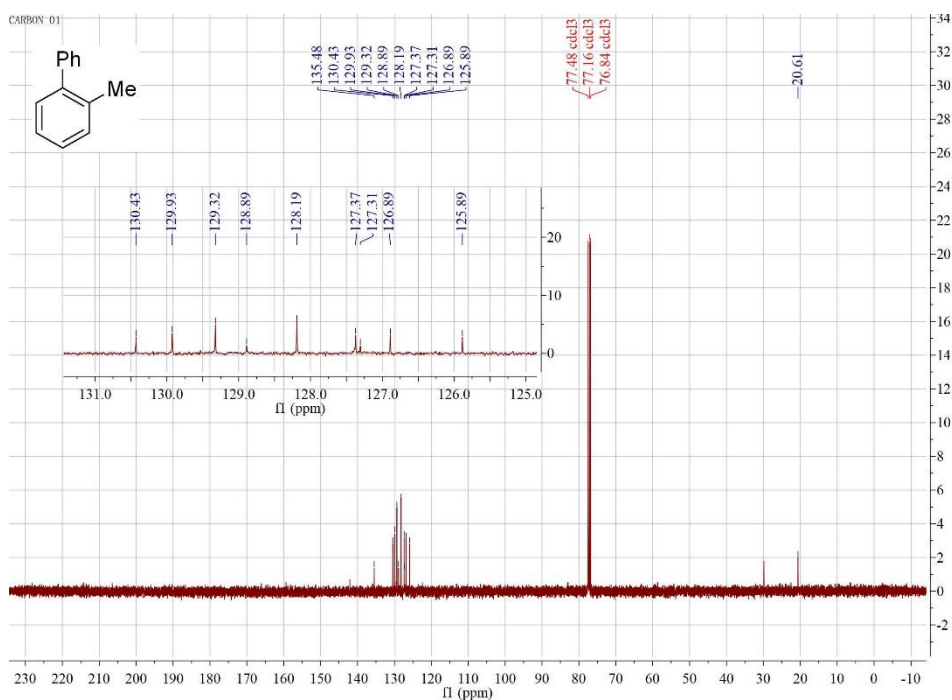

### <sup>1</sup>H NMR spectra of **2i**:

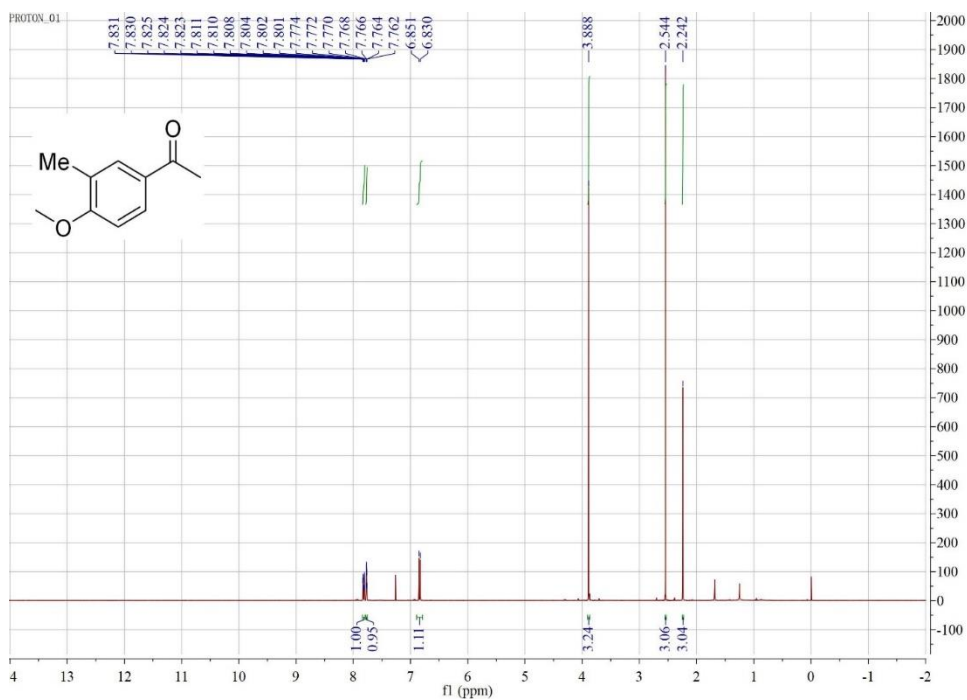

### <sup>13</sup>C NMR spectra of **2i**:

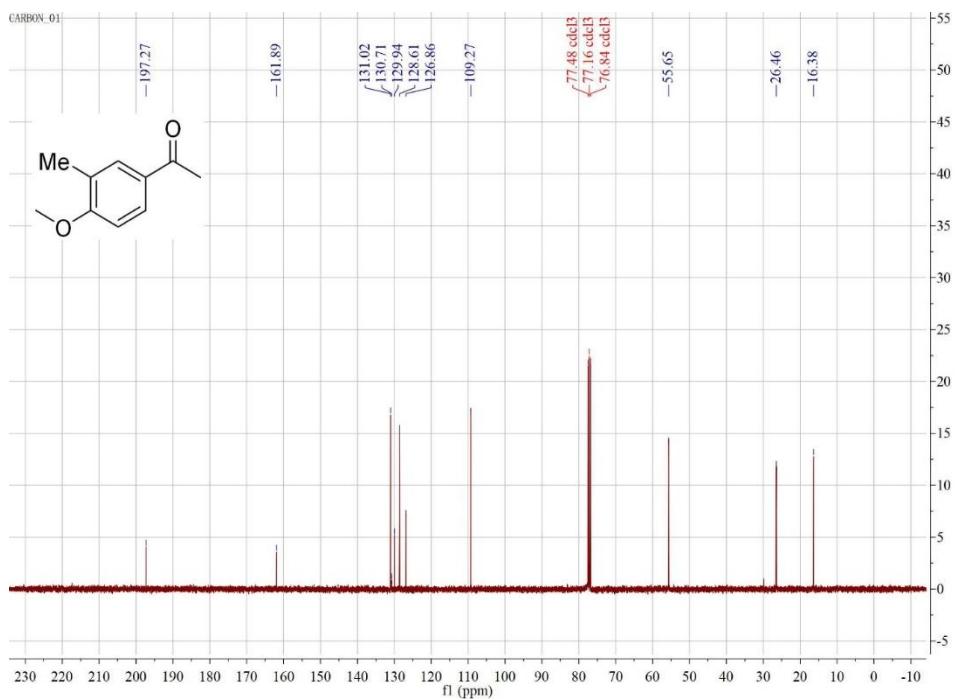

<sup>1</sup>H NMR spectra of **2j**:

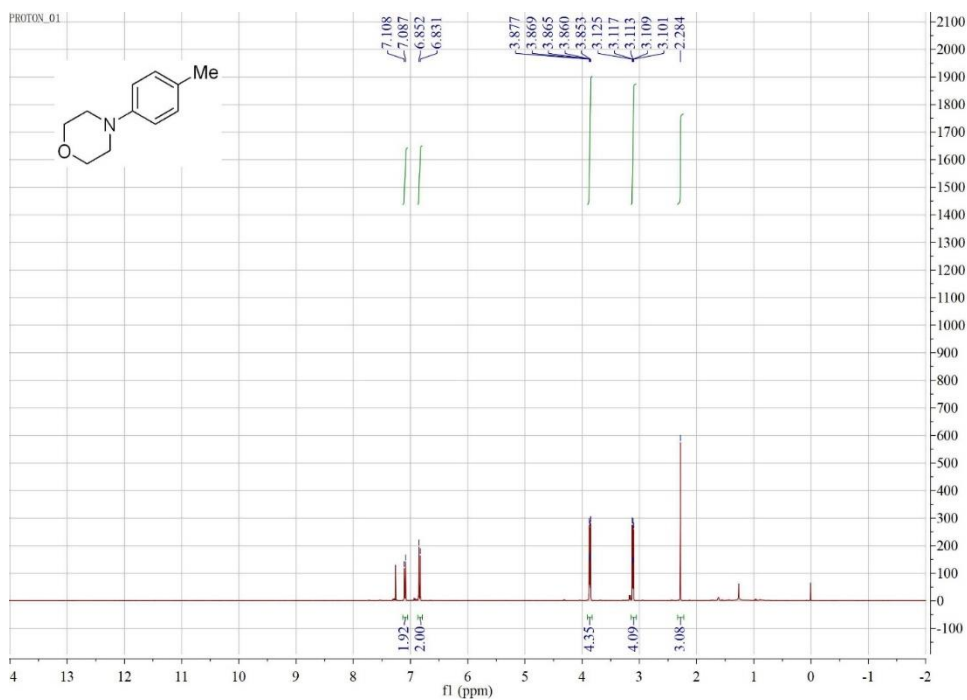

<sup>13</sup>C NMR spectra of **2j**:

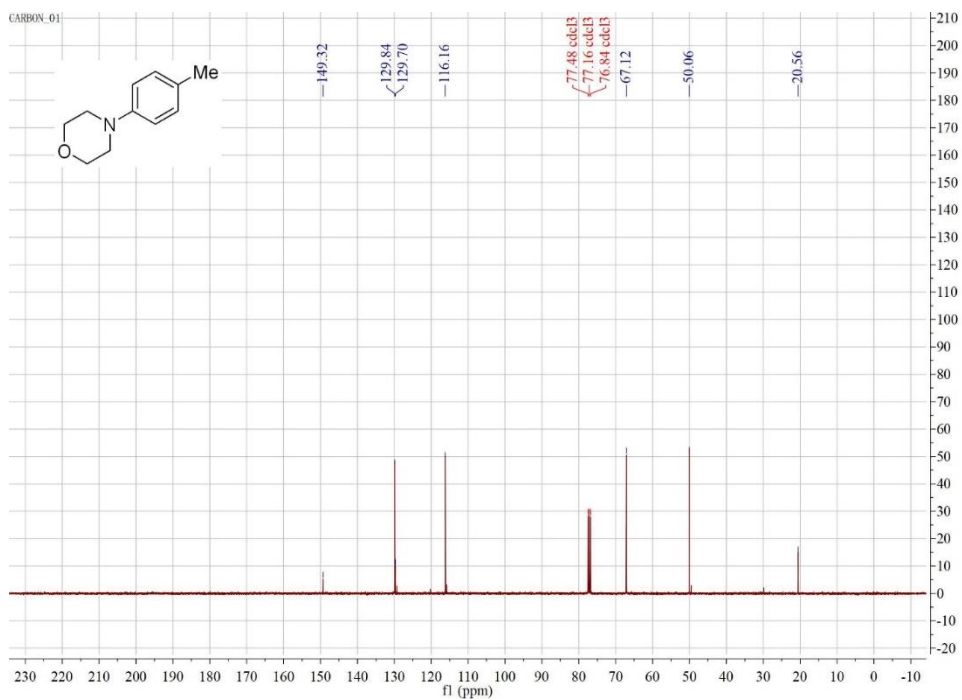

### <sup>1</sup>H NMR spectra of **2k**:

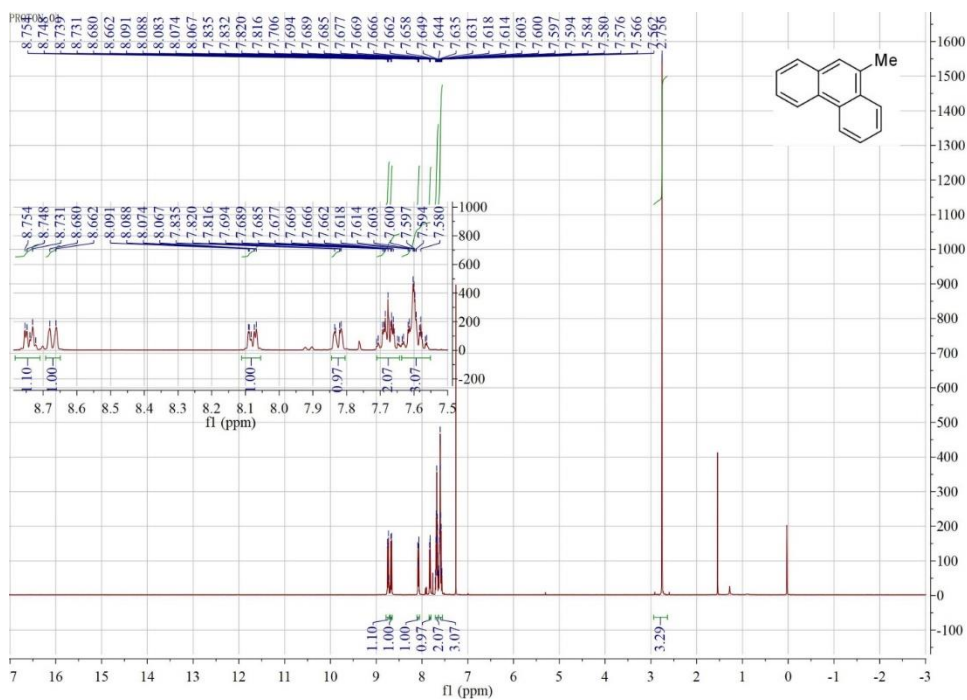

### <sup>13</sup>C NMR spectra of **2k**:

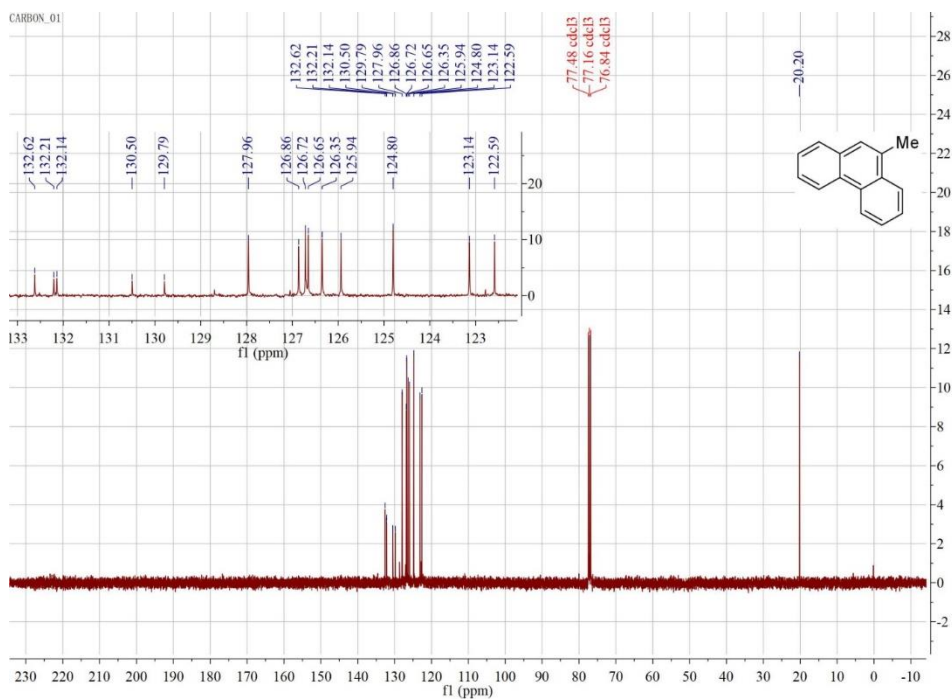

### <sup>1</sup>H NMR spectra of **2I**:

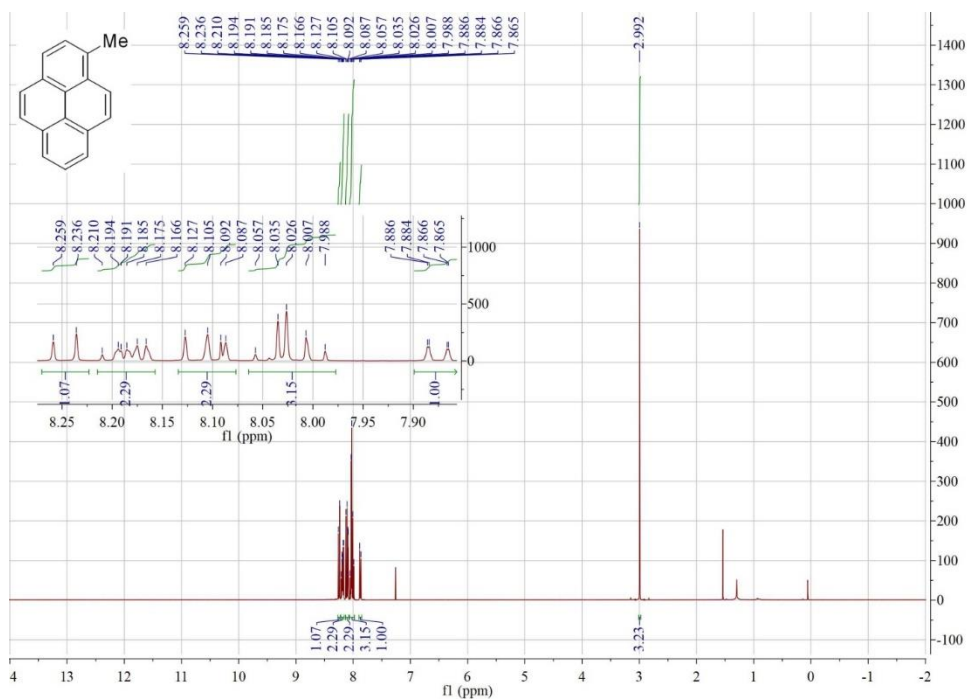

### <sup>13</sup>C NMR spectra of **2I**:

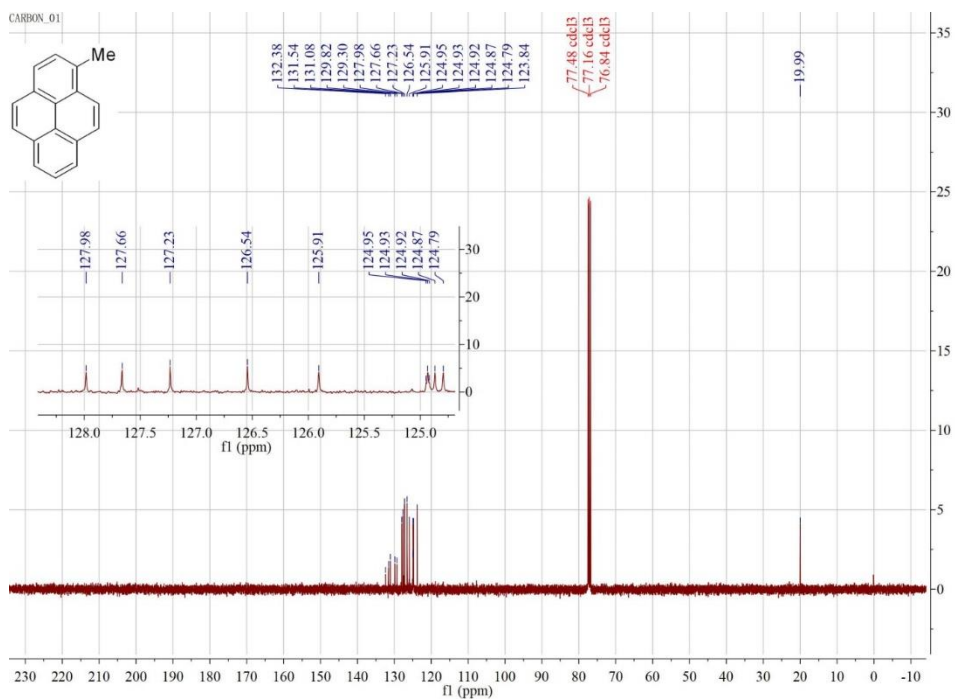

<sup>1</sup>H NMR spectra of **2m**:

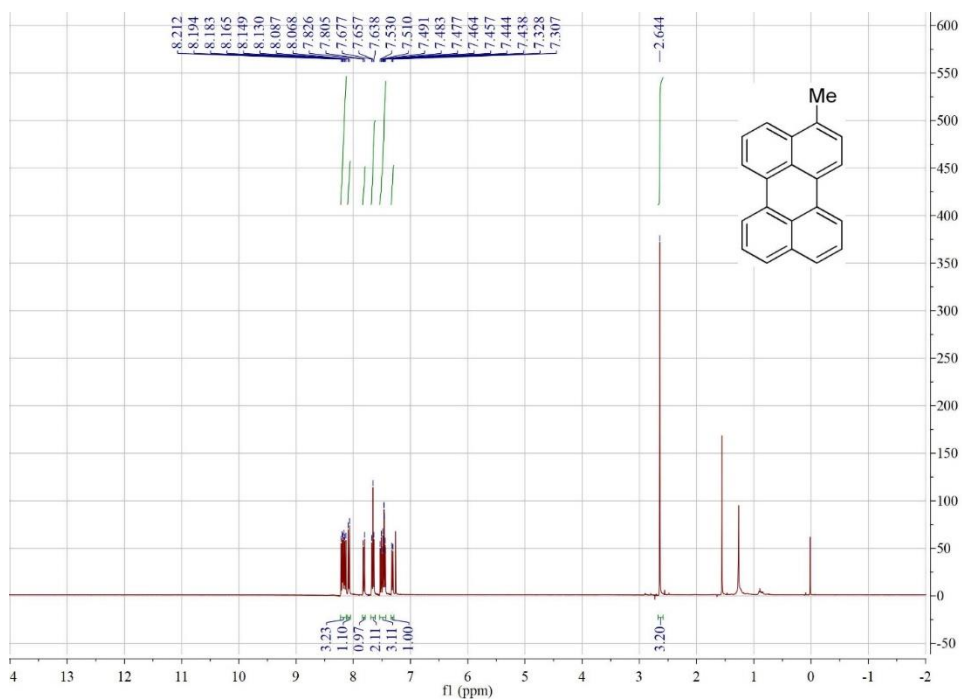

<sup>13</sup>C NMR spectra of **2m**:

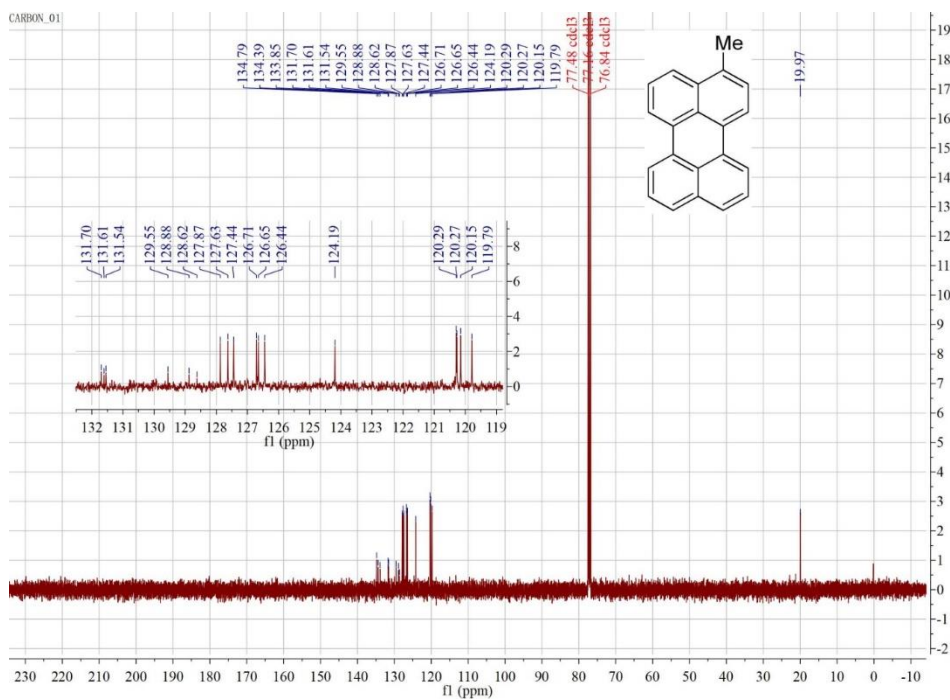



<sup>1</sup>H NMR spectra of **2n**:

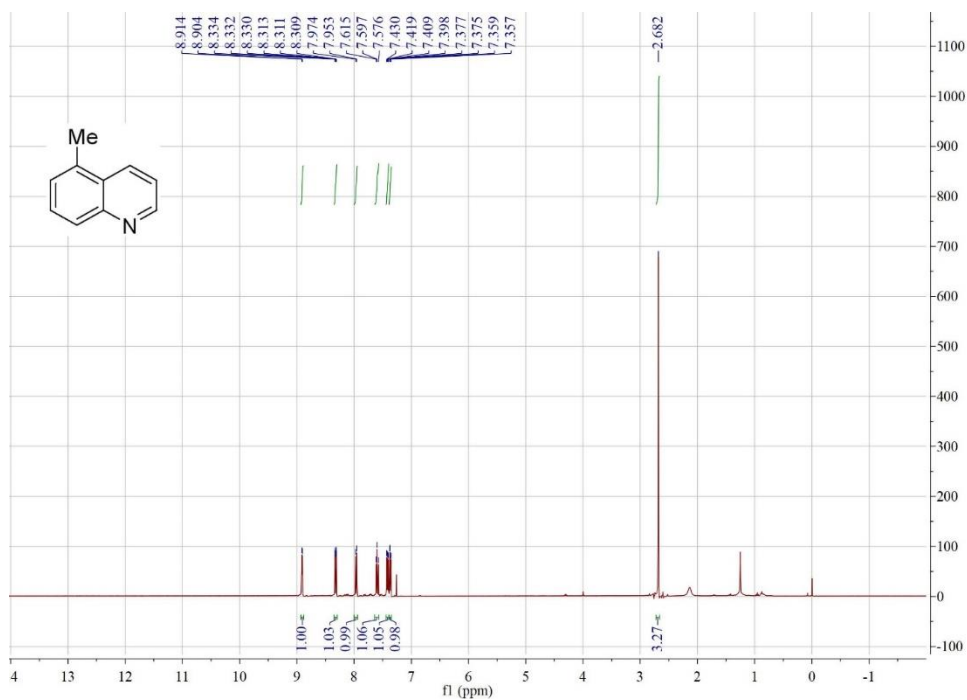

<sup>13</sup>C NMR spectra of **2n**:

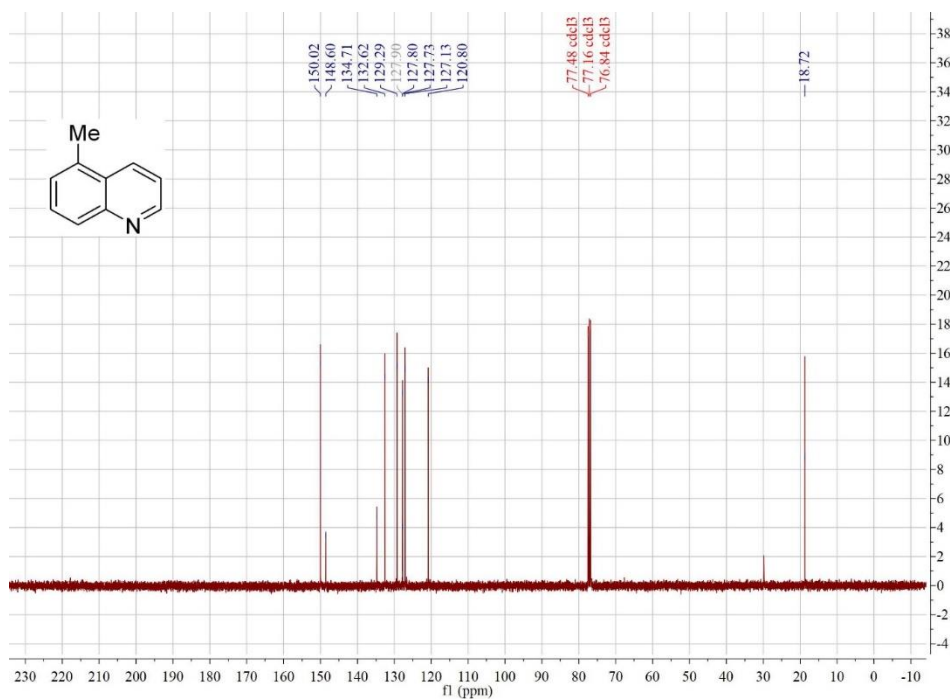



<sup>1</sup>H NMR spectra of **2o**:

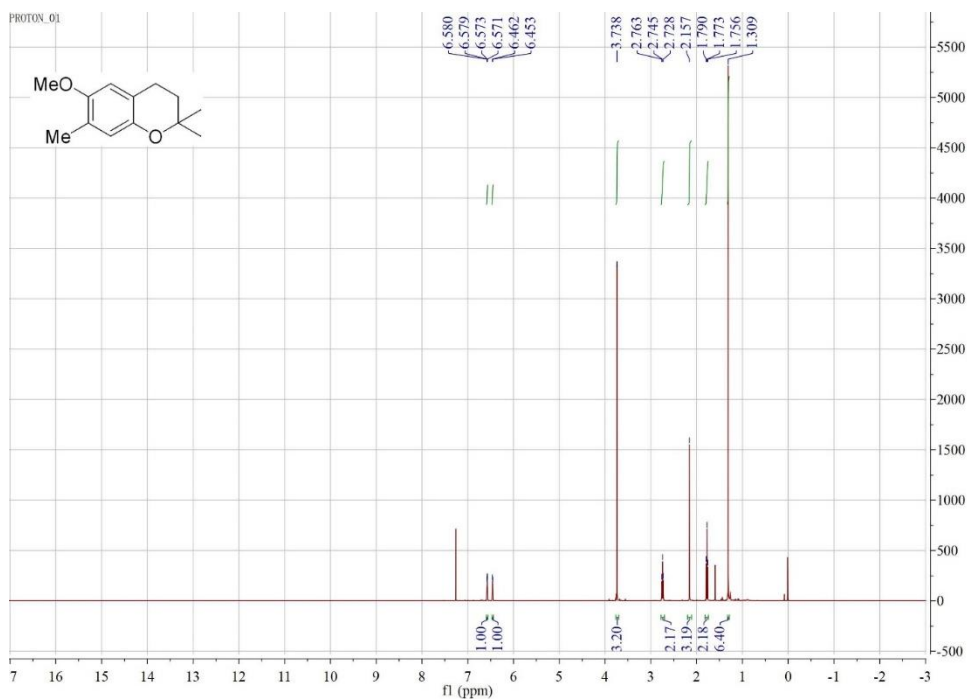

<sup>13</sup>C NMR spectra of **2o**:

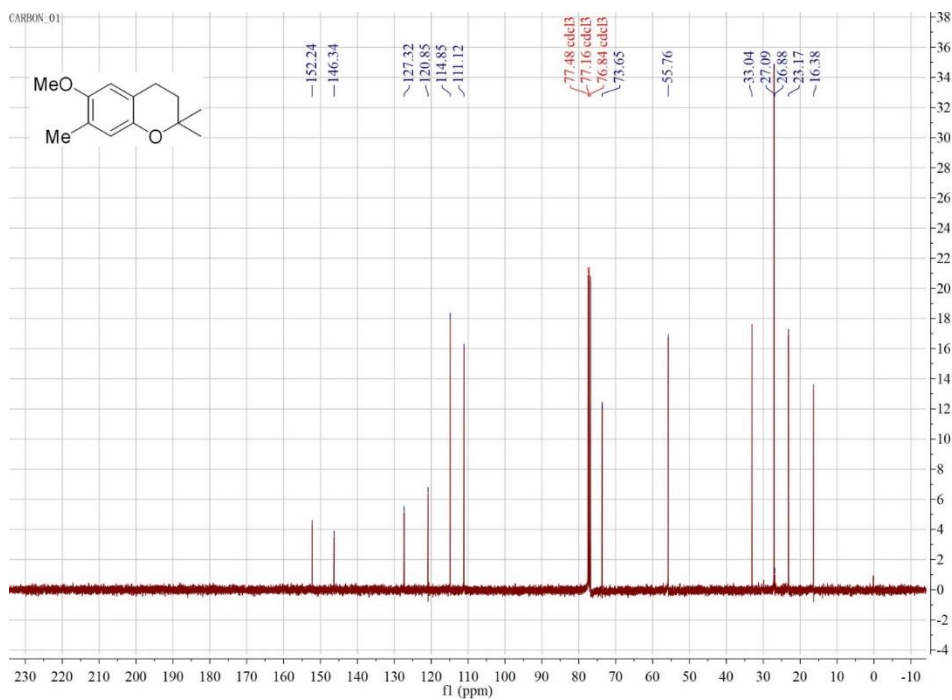

<sup>1</sup>H NMR spectra of **2p**:

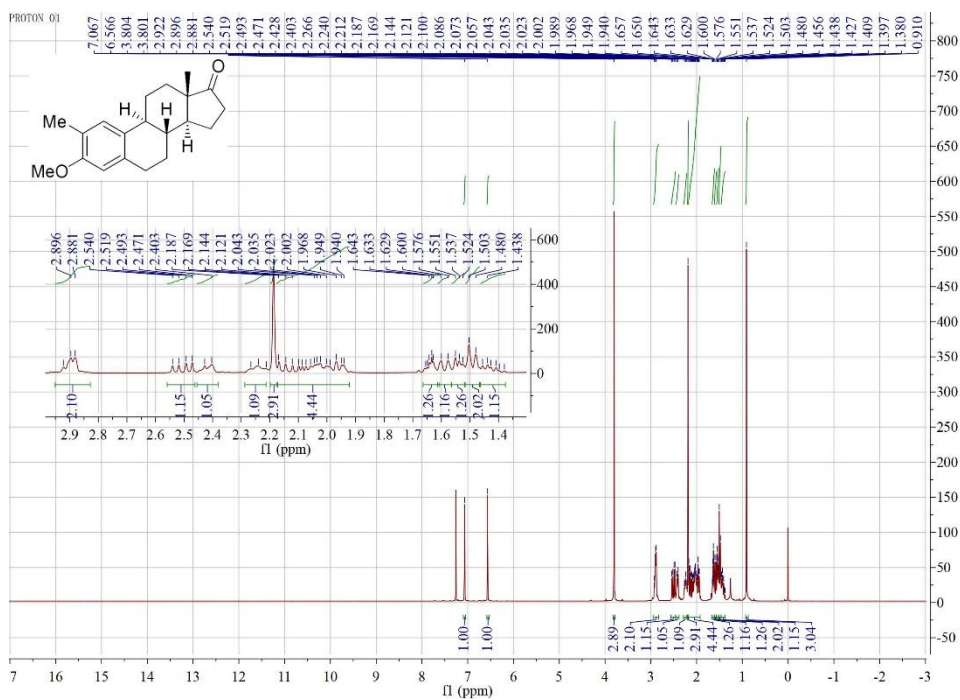

<sup>13</sup>C NMR spectra of **2p**:

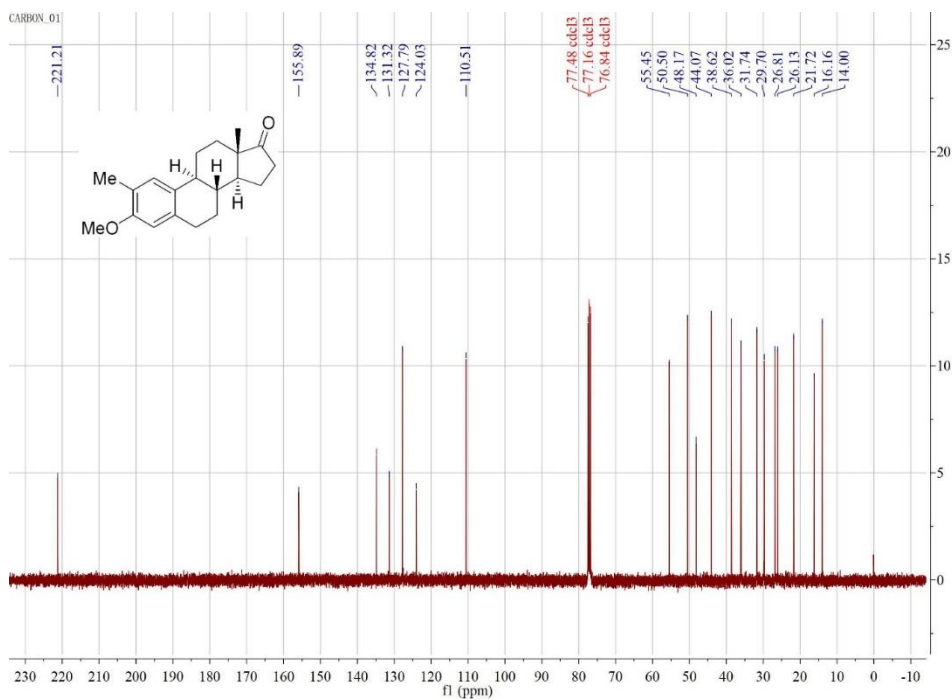

### <sup>1</sup>H NMR spectra of **2q**:

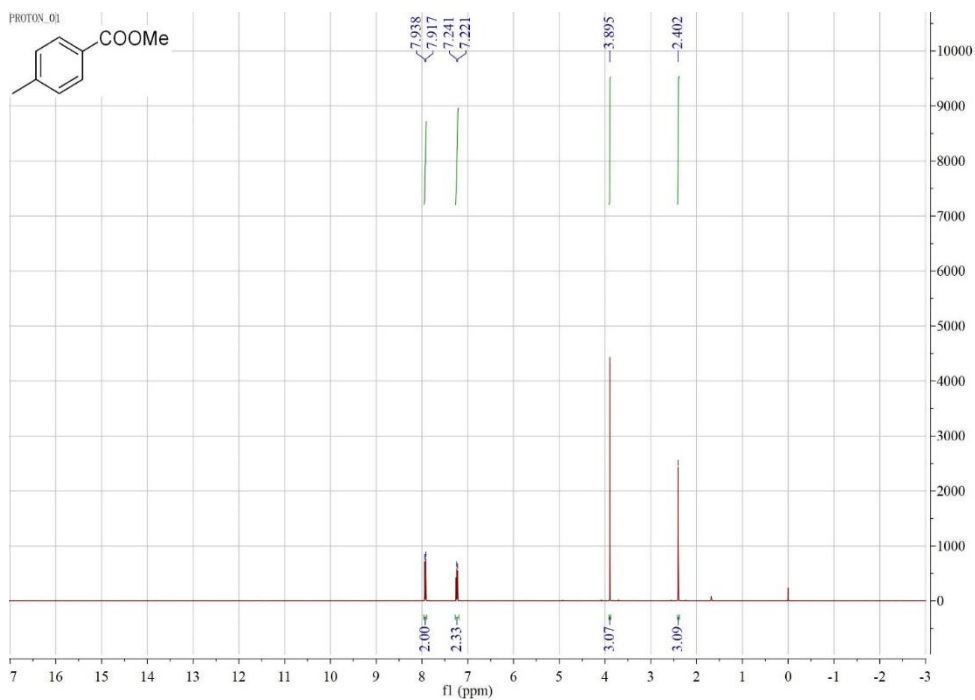

### <sup>13</sup>C NMR spectra of **2q**:

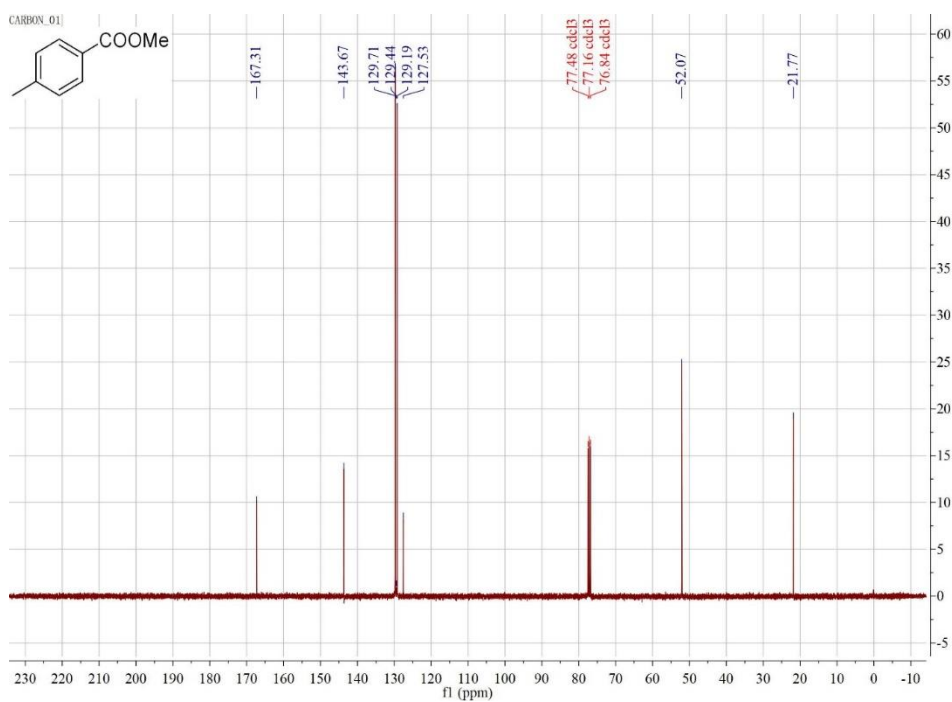

### <sup>1</sup>H NMR spectra of **2r**:

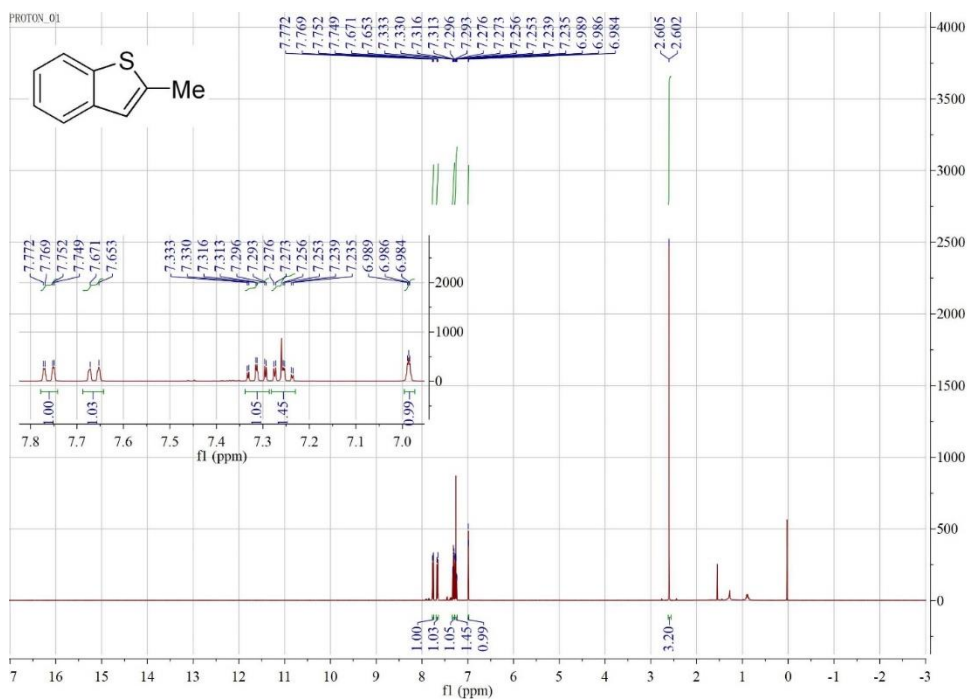

### <sup>13</sup>C NMR spectra of **2r**:

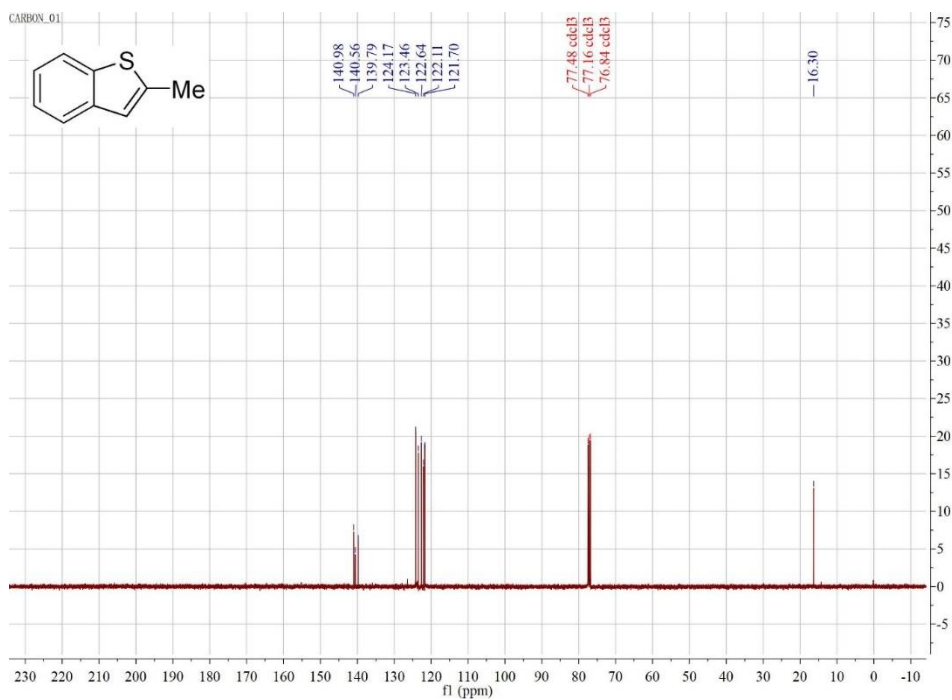

### <sup>1</sup>H NMR spectra of **2s**:

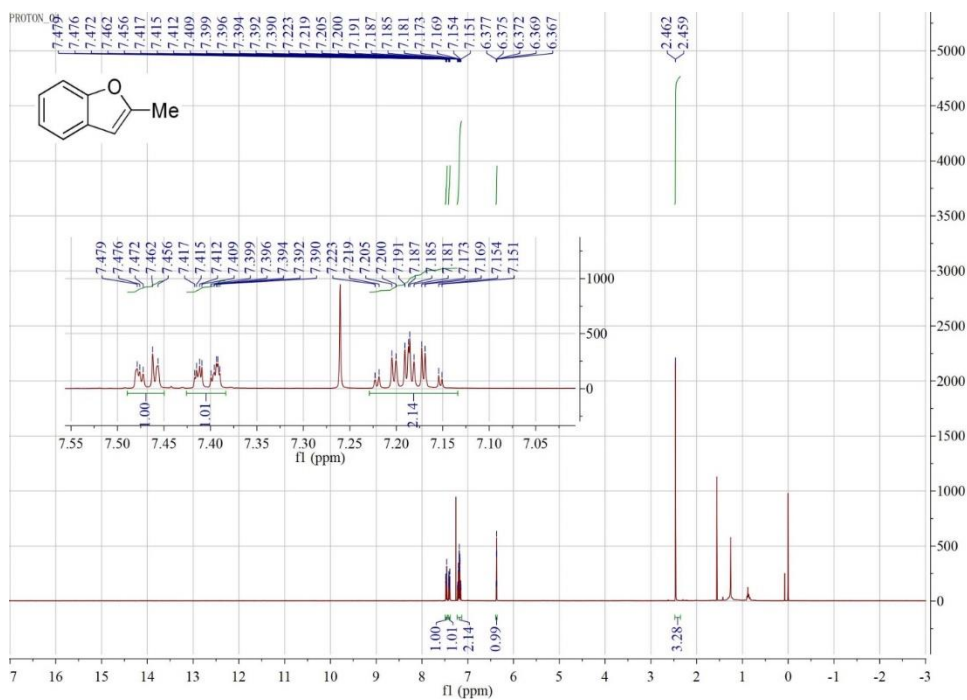

### <sup>13</sup>C NMR spectra of **2s**:

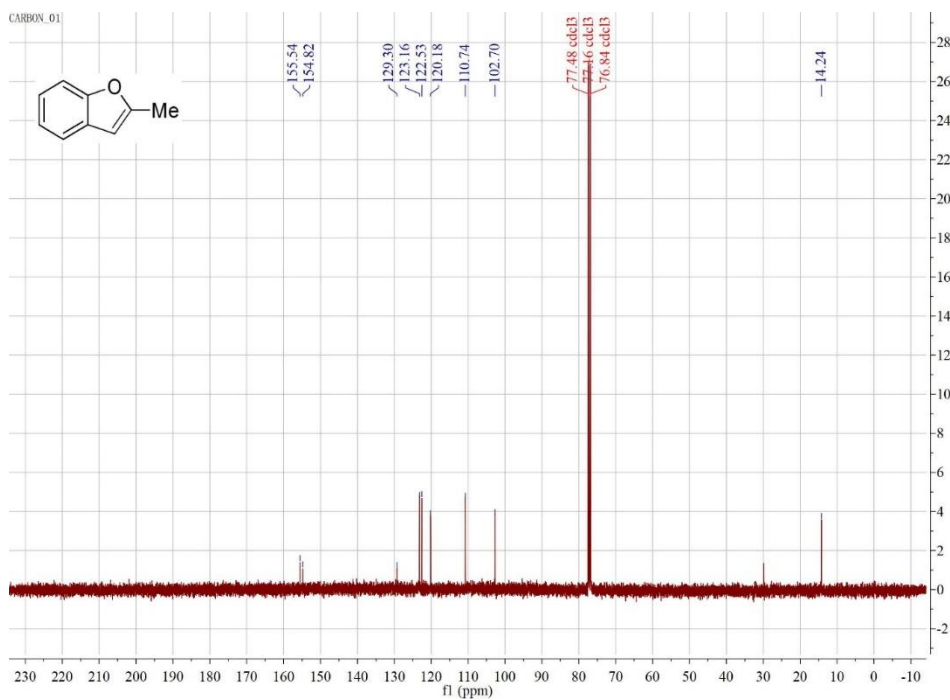

### <sup>1</sup>H NMR spectra of **2t**:

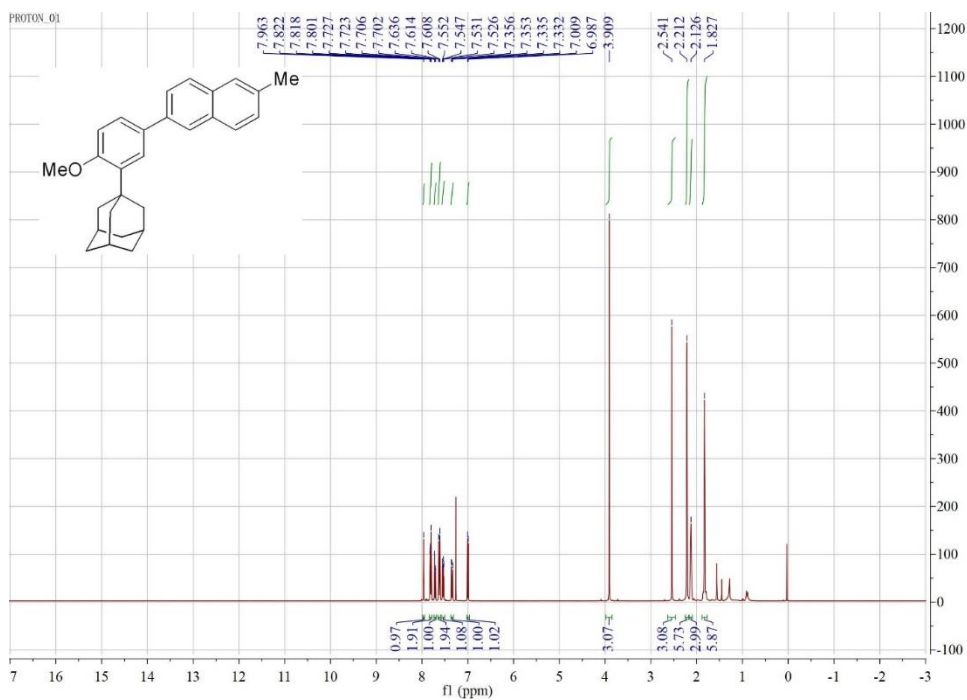

### <sup>13</sup>C NMR spectra of **2t**:

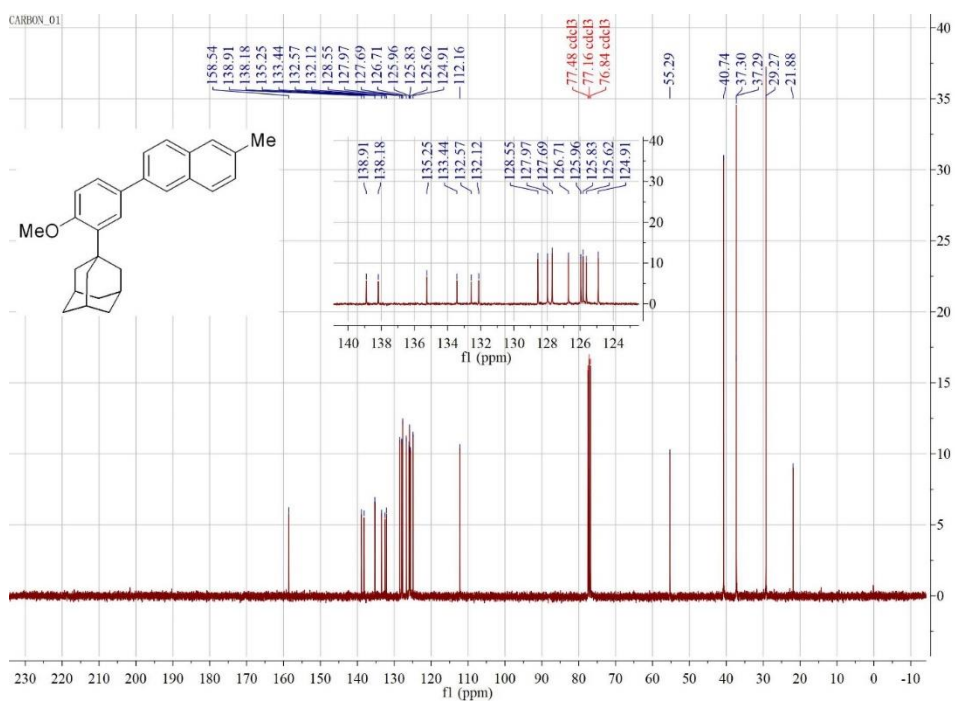

### <sup>1</sup>H NMR spectra of **3a**:

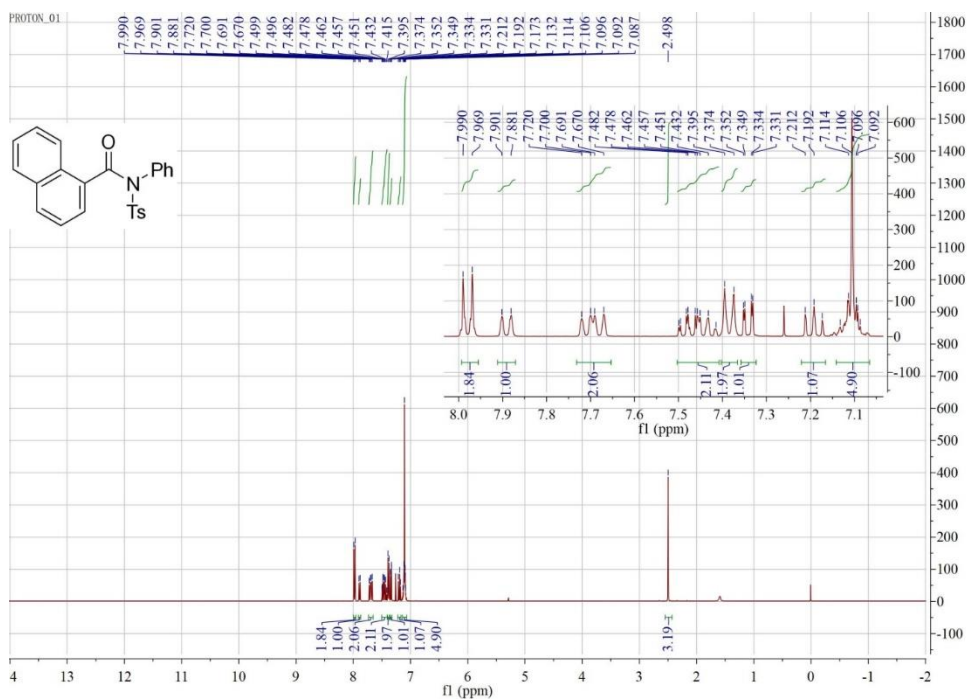

### <sup>13</sup>C NMR spectra of **3a**:

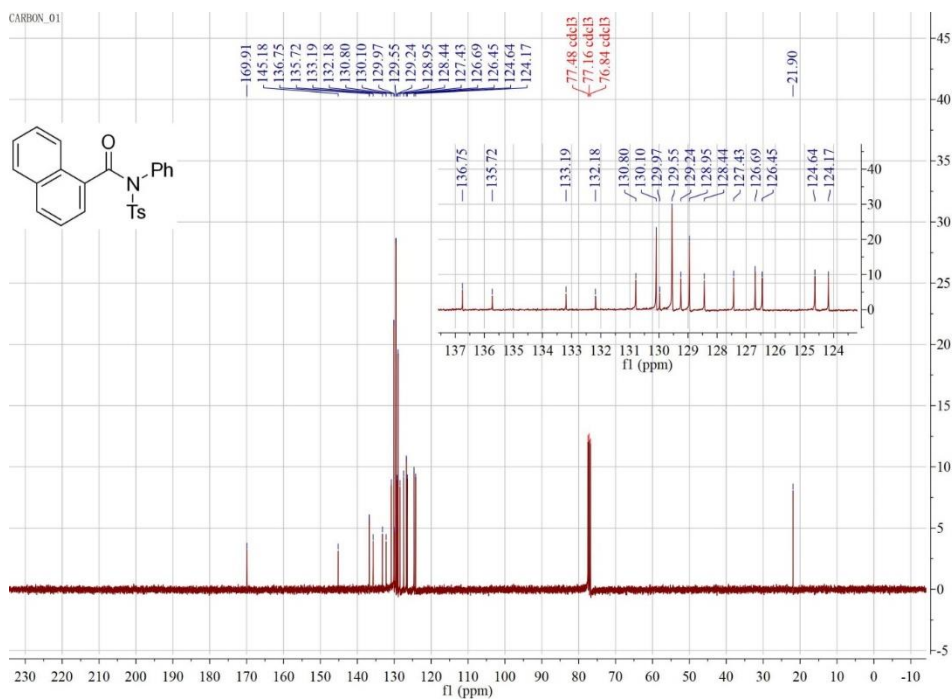



### <sup>1</sup>H NMR spectra of **3b**:

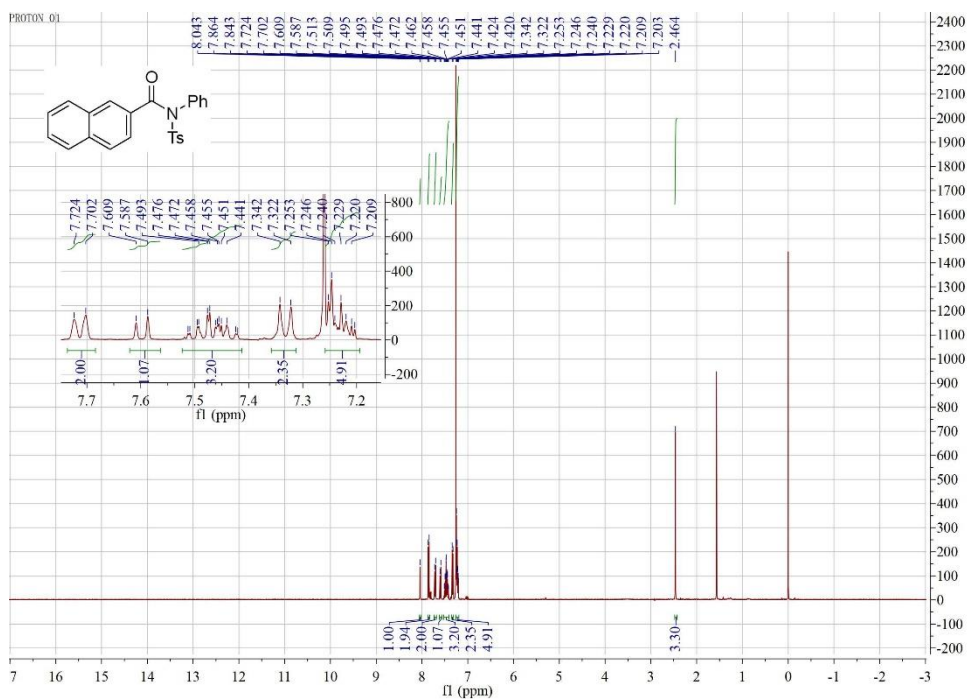

### <sup>13</sup>C NMR spectra of **3b**:

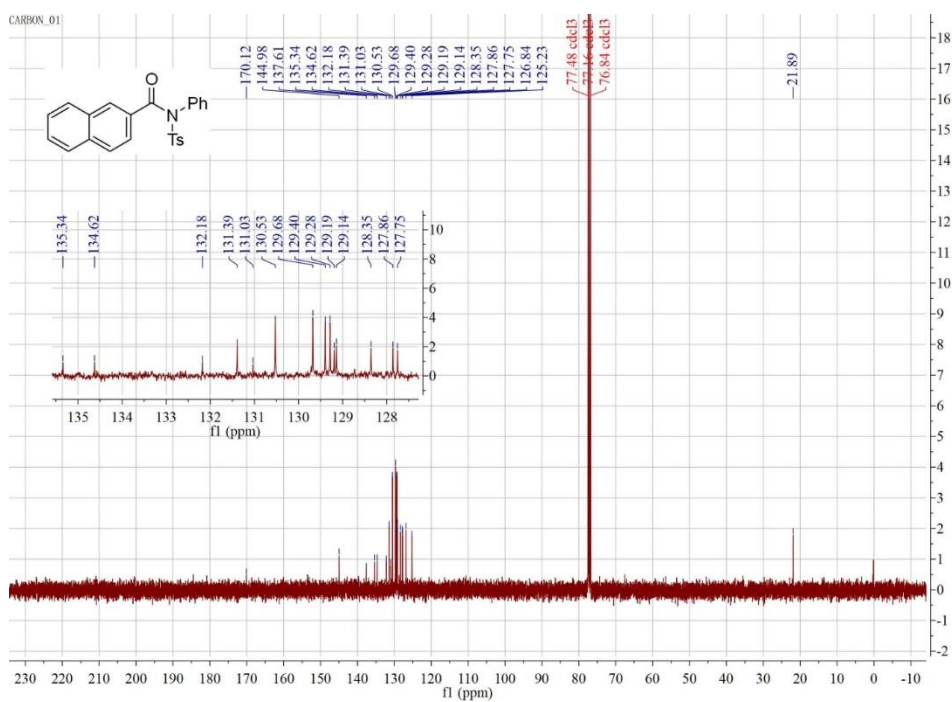



### <sup>1</sup>H NMR spectra of **3c**:

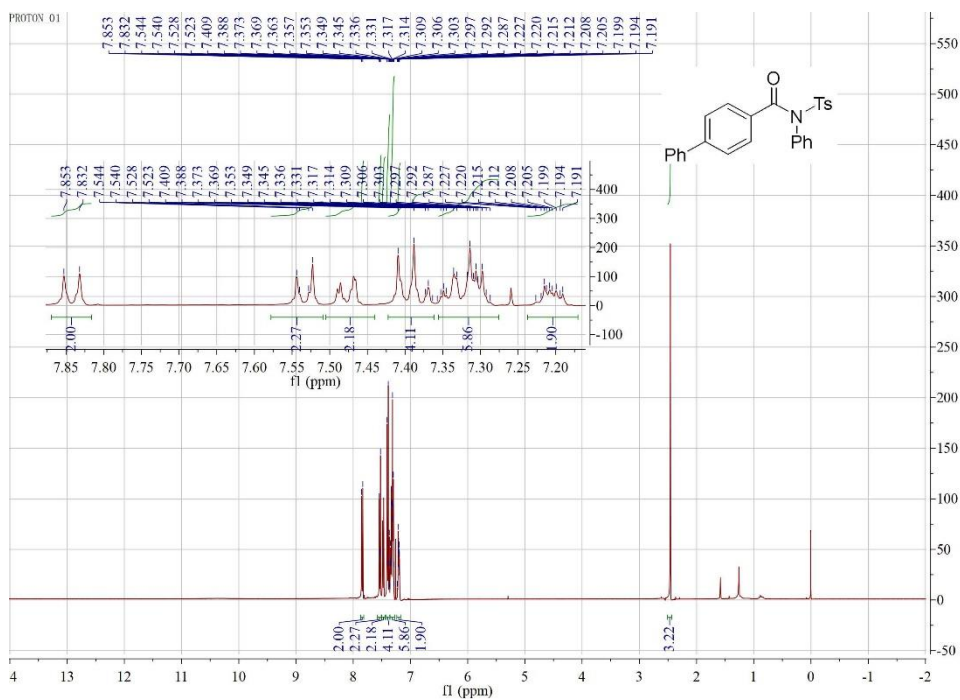

### <sup>13</sup>C NMR spectra of **3c**:

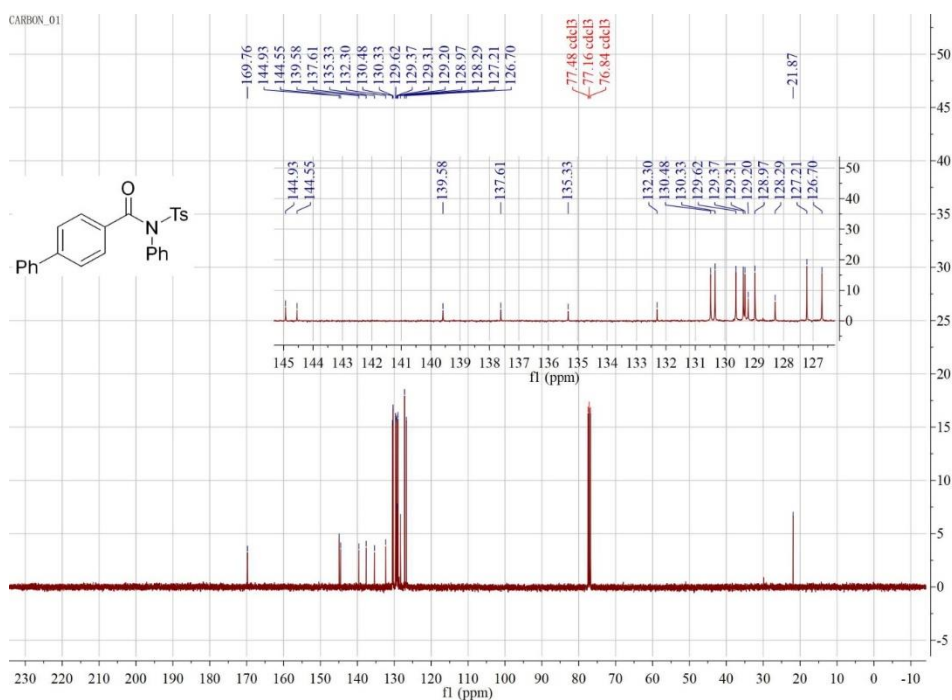

<sup>1</sup>H NMR spectra of **3d**:

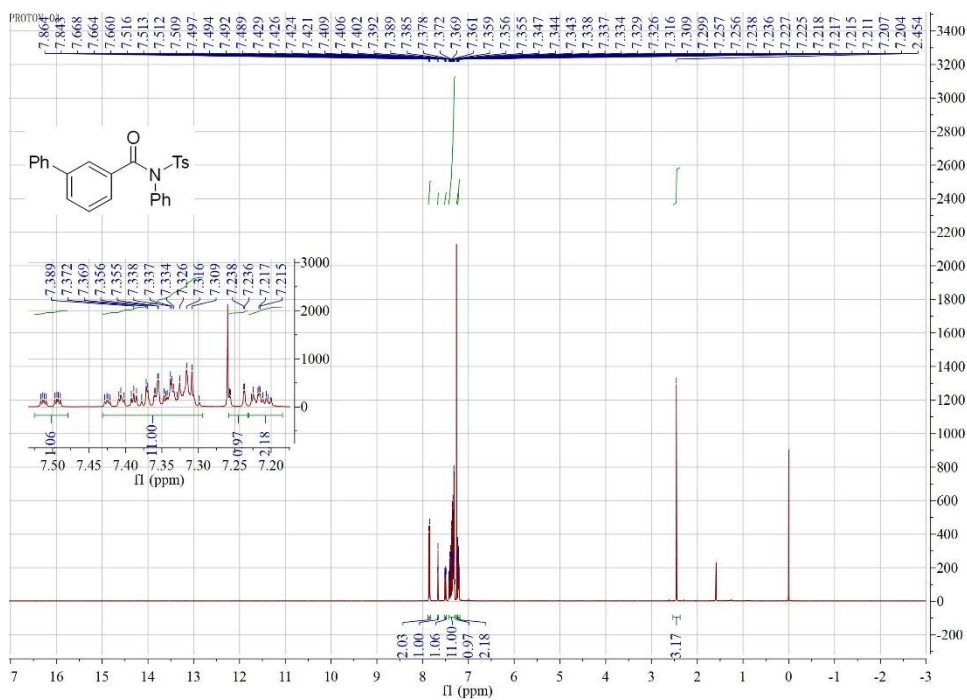

<sup>13</sup>C NMR spectra of **3d**:

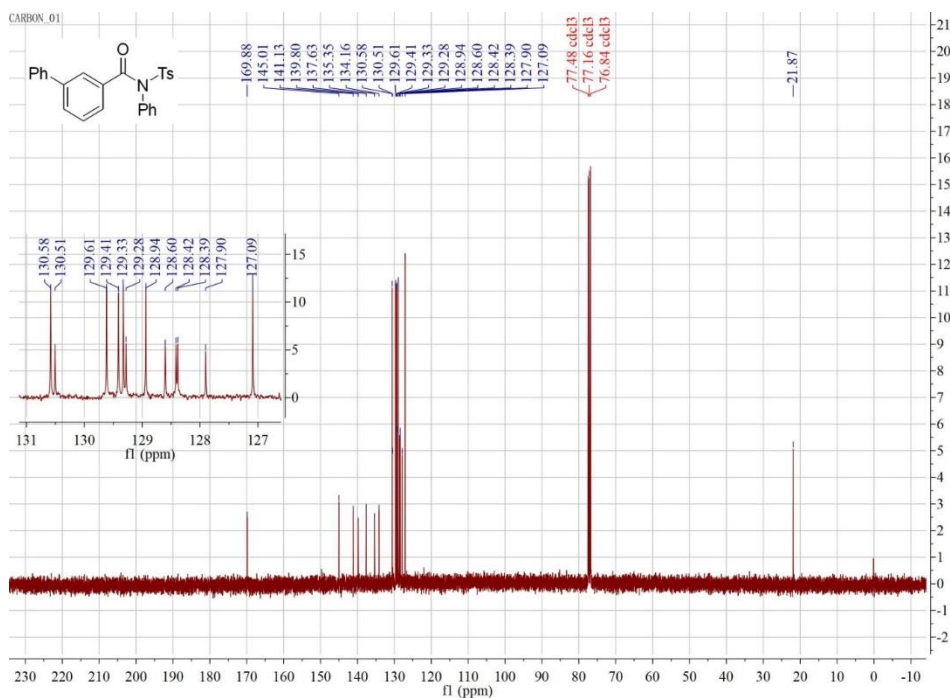

<sup>1</sup>H NMR spectra of **3e**:

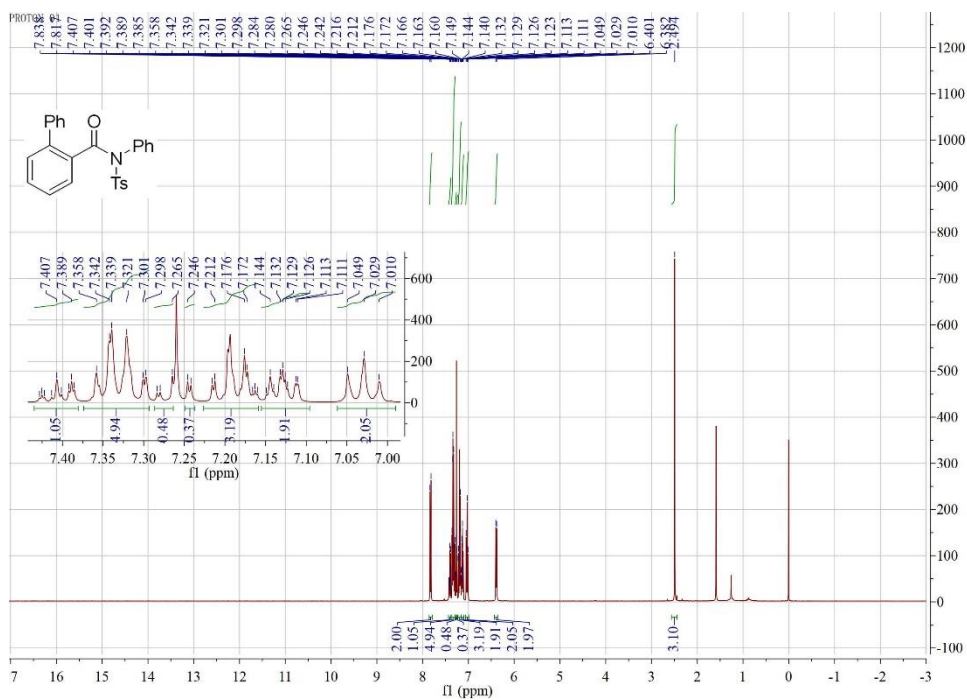

<sup>13</sup>C NMR spectra of **3e**:

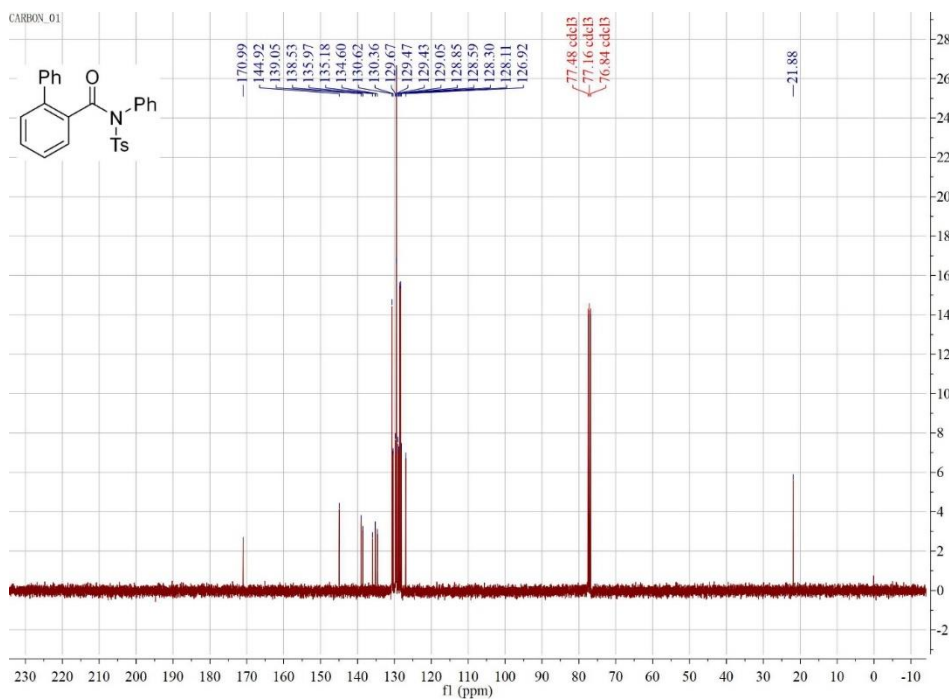

<sup>1</sup>H NMR spectra of **3f**:

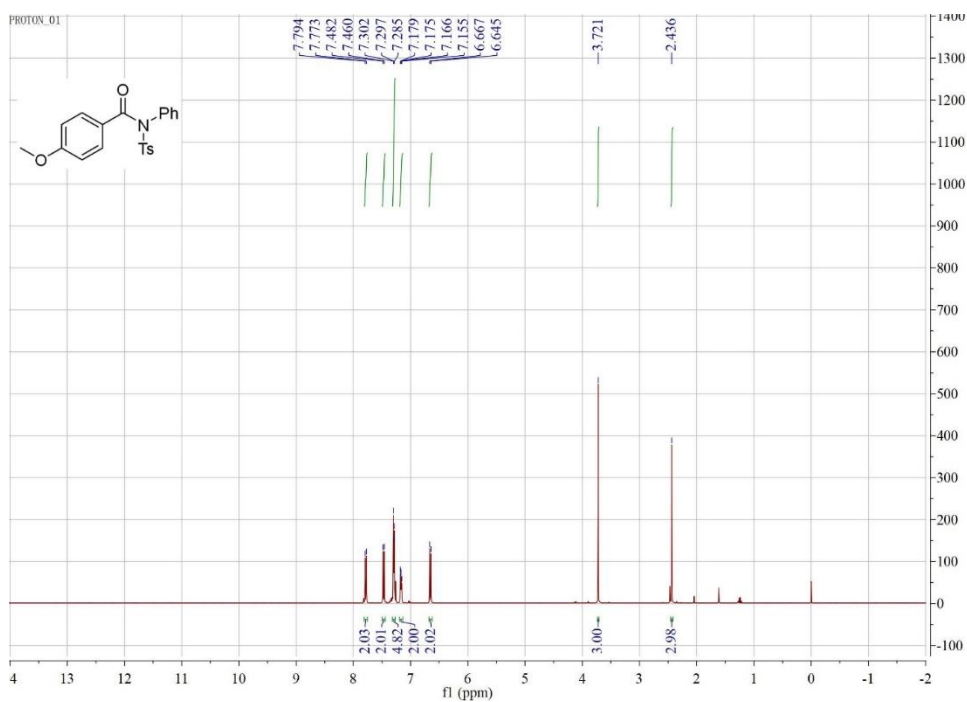

<sup>13</sup>C NMR spectra of **3f**:

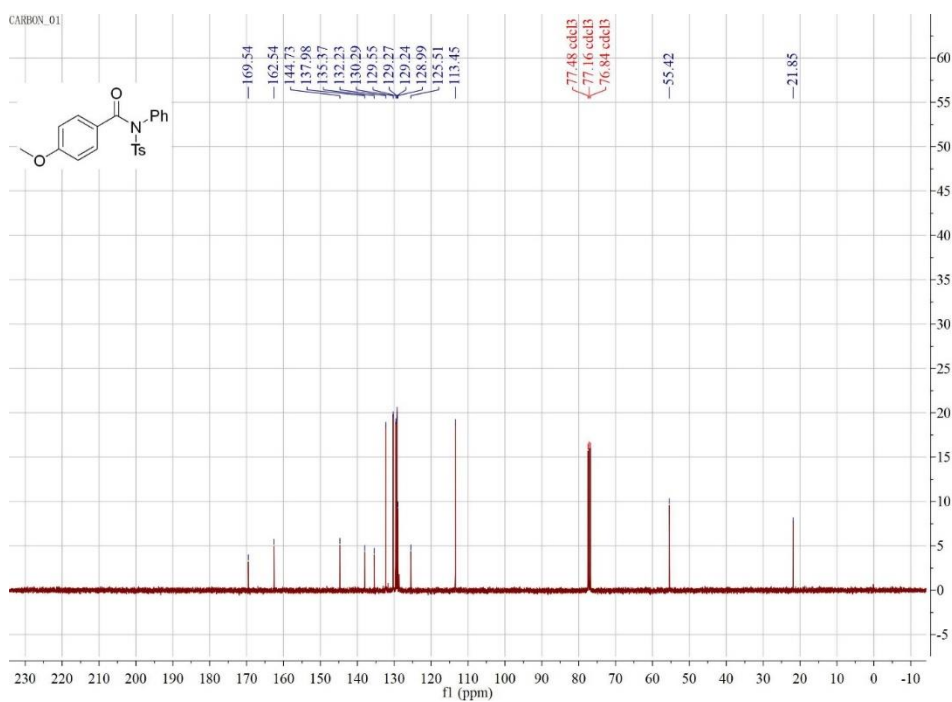

### <sup>1</sup>H NMR spectra of **3g**:

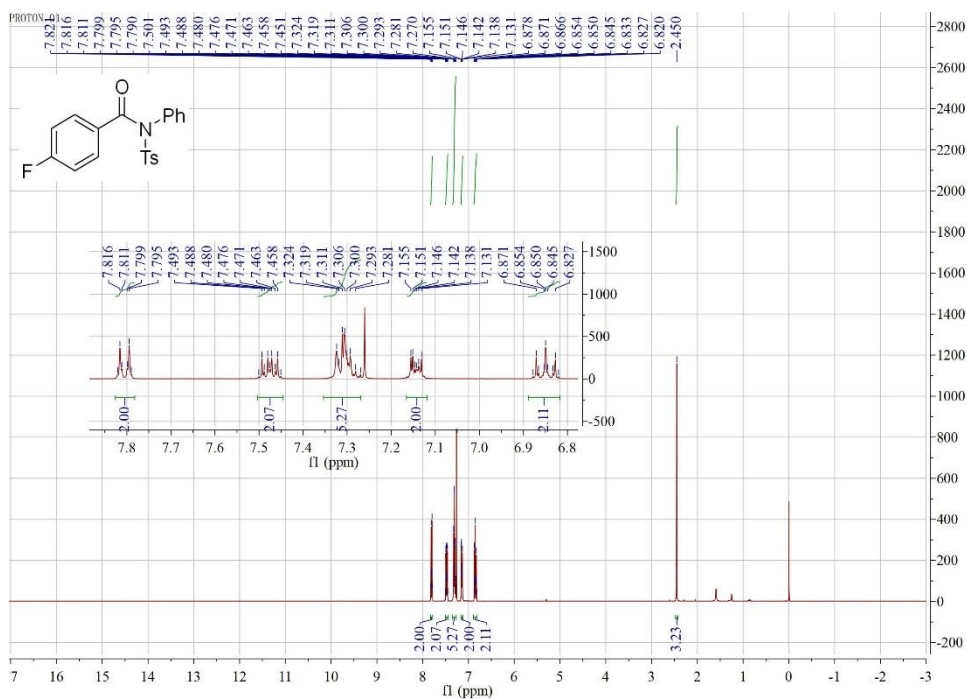

### <sup>13</sup>C NMR spectra of **3g**:

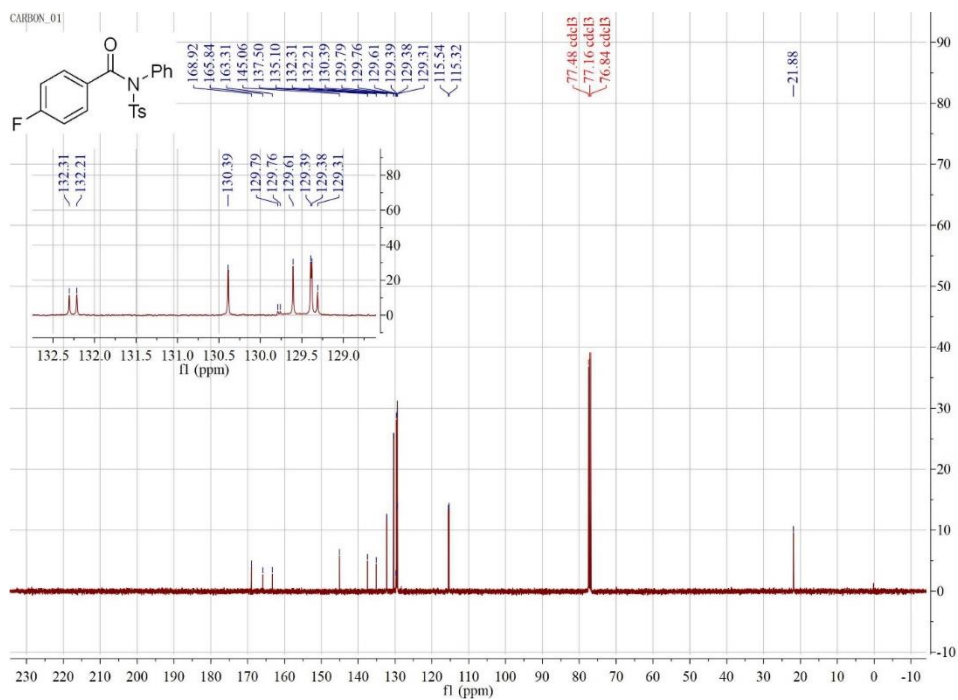

<sup>19</sup>F NMR spectra of **3g**:

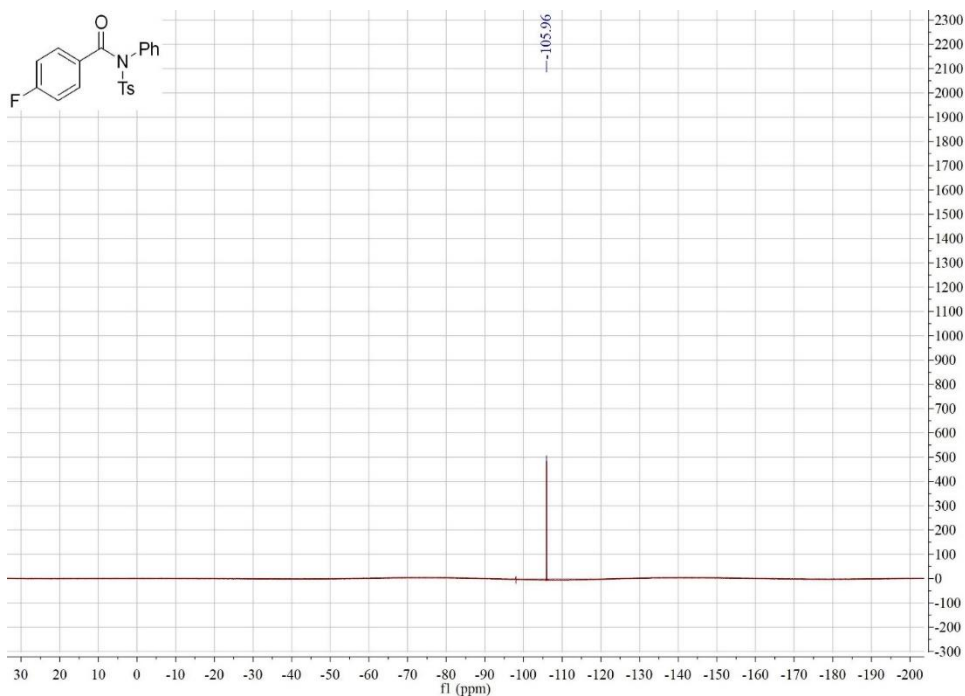

<sup>1</sup>H NMR spectra of **3h**:

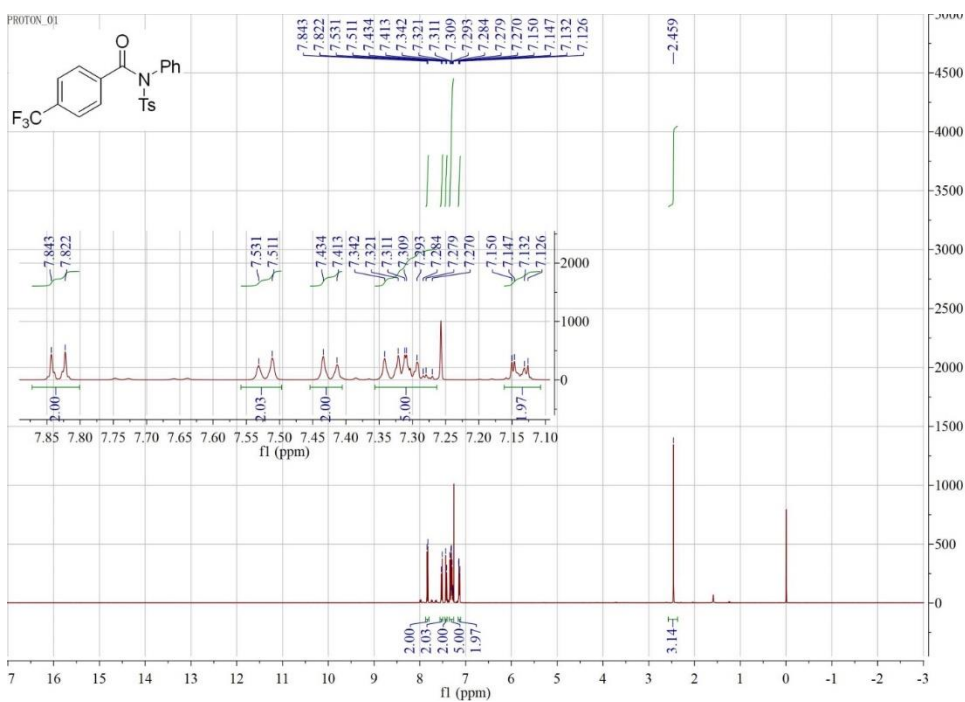

<sup>13</sup>C NMR spectra of **3h**:

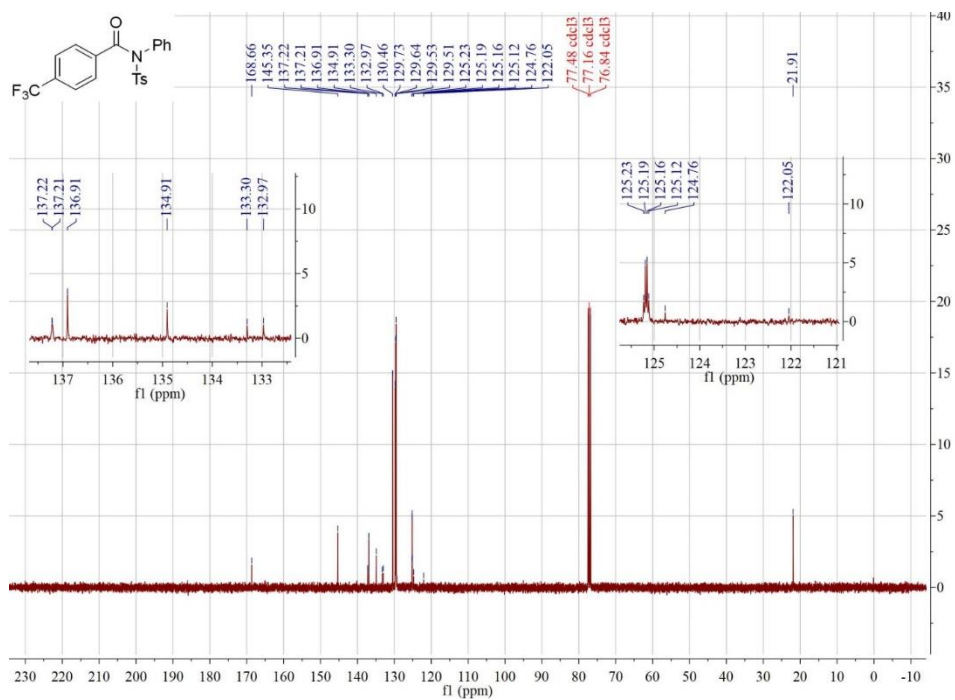

<sup>19</sup>F NMR spectra of **3h**:

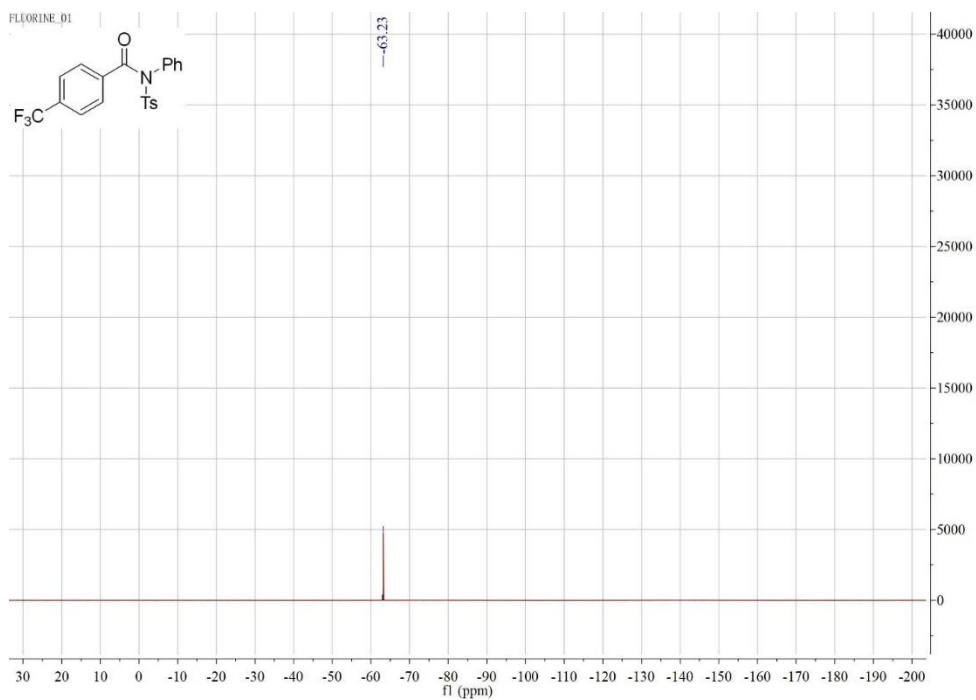



<sup>1</sup>H NMR spectra of **3q**:

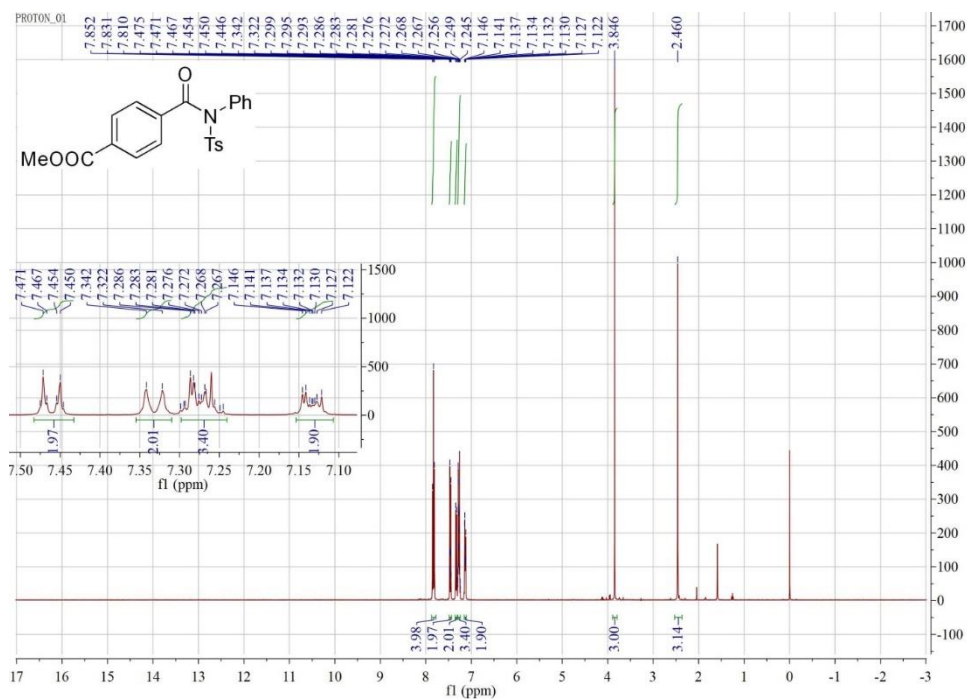

<sup>13</sup>C NMR spectra of **3q**:

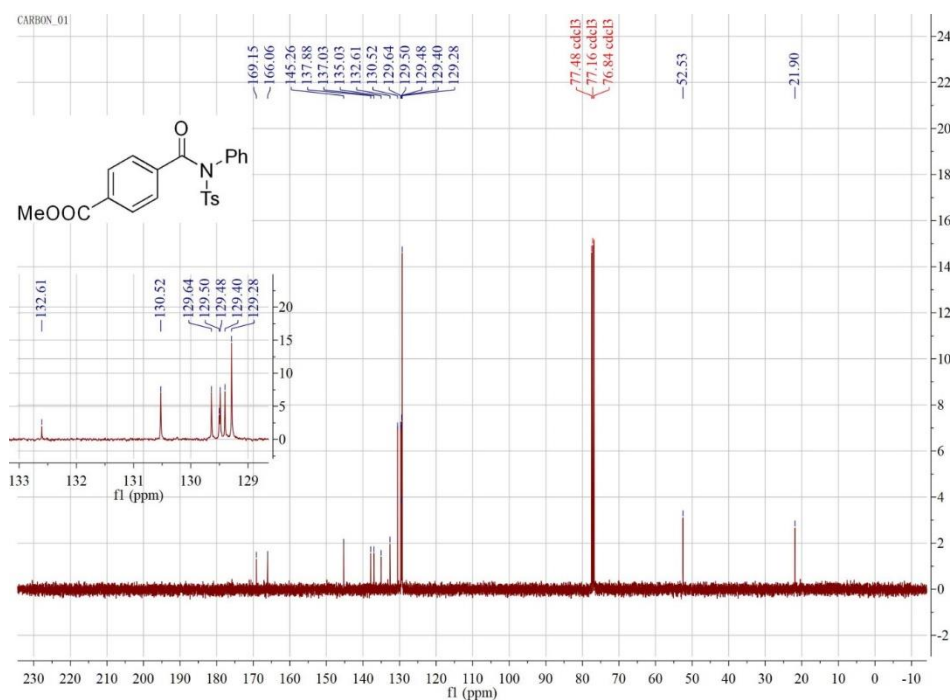



### <sup>1</sup>H NMR spectra of **3r**:

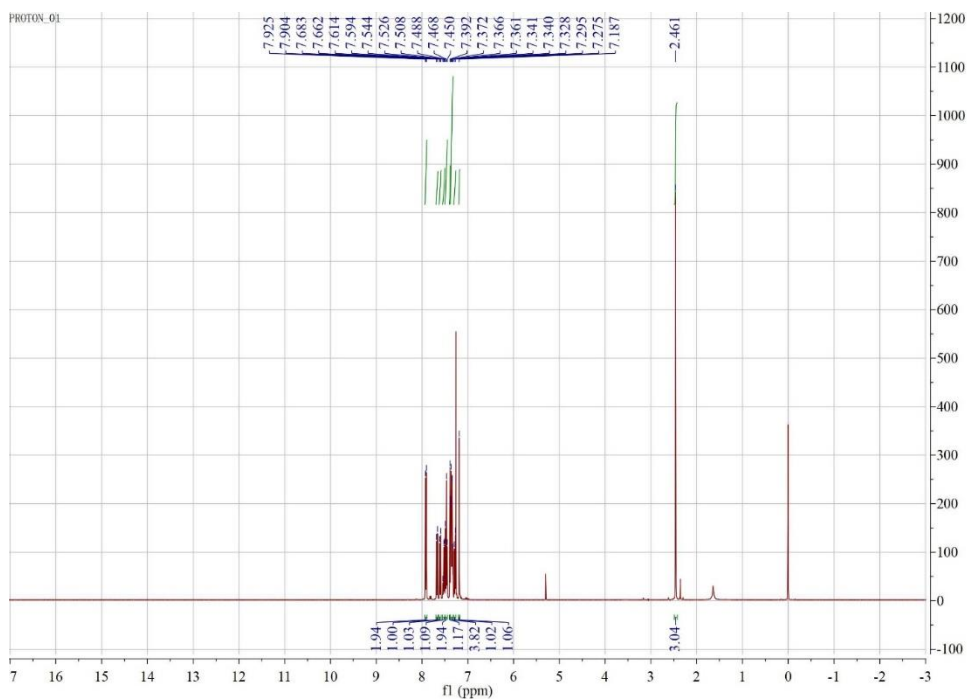

### <sup>13</sup>C NMR spectra of **3r**:

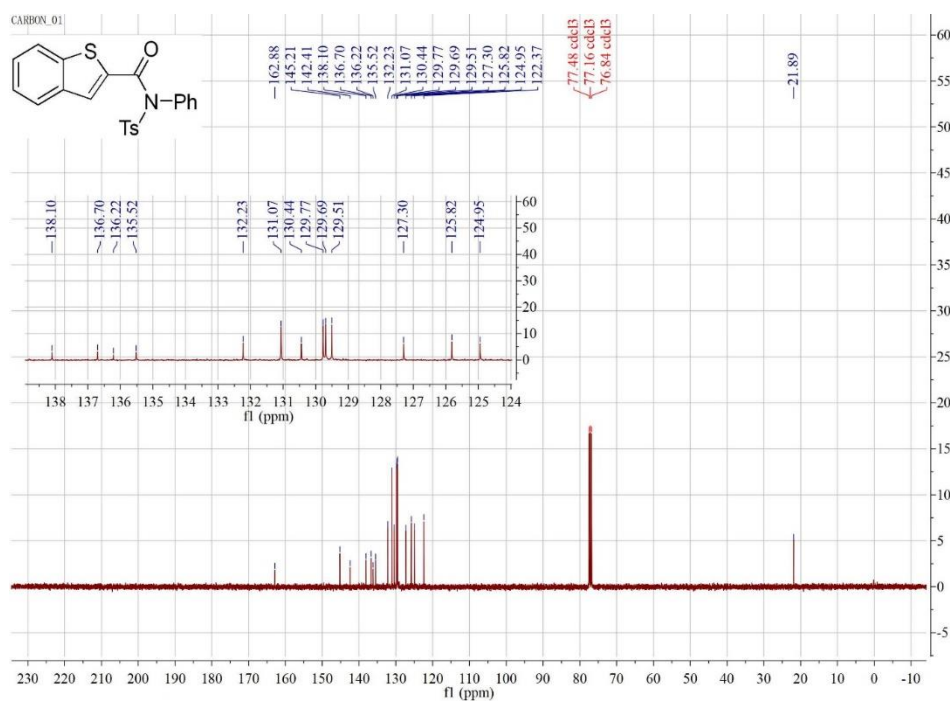

### <sup>1</sup>H NMR spectra of **3s**:

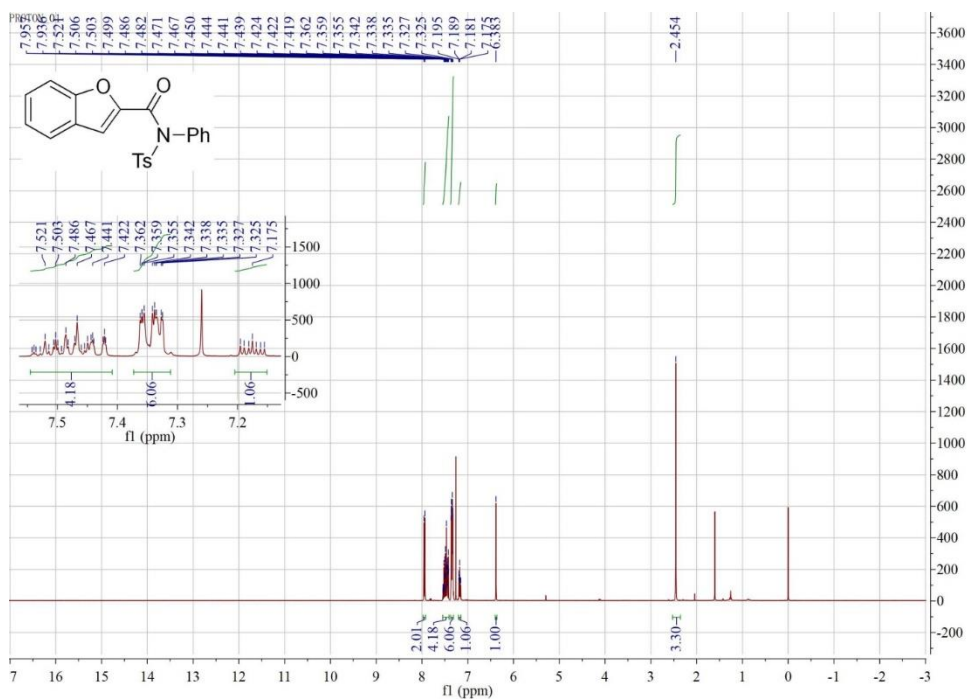

### <sup>13</sup>C NMR spectra of **3s**:

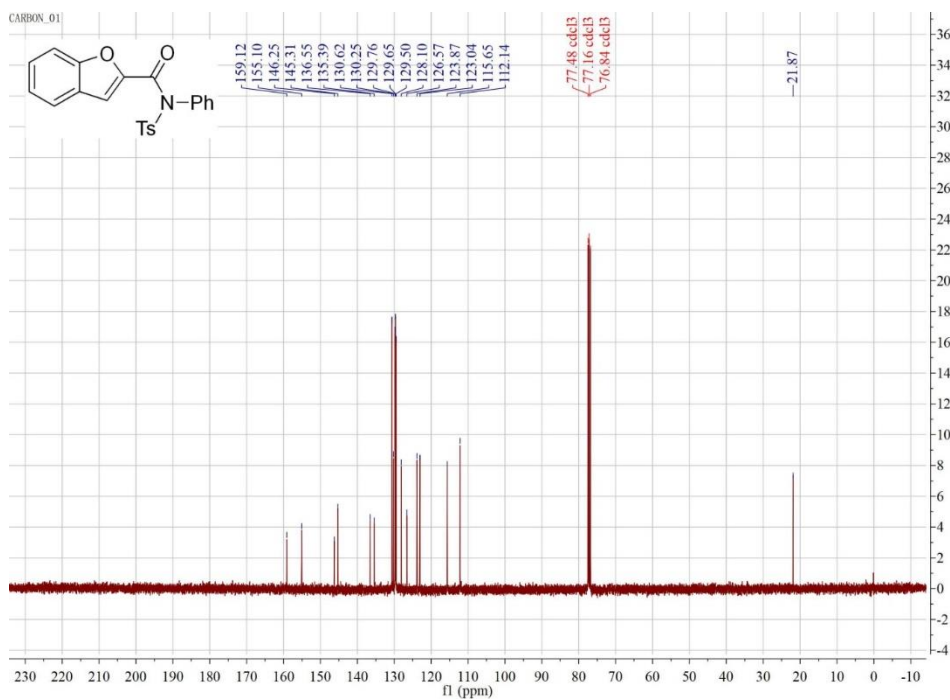

### <sup>1</sup>H NMR spectra of 4a:

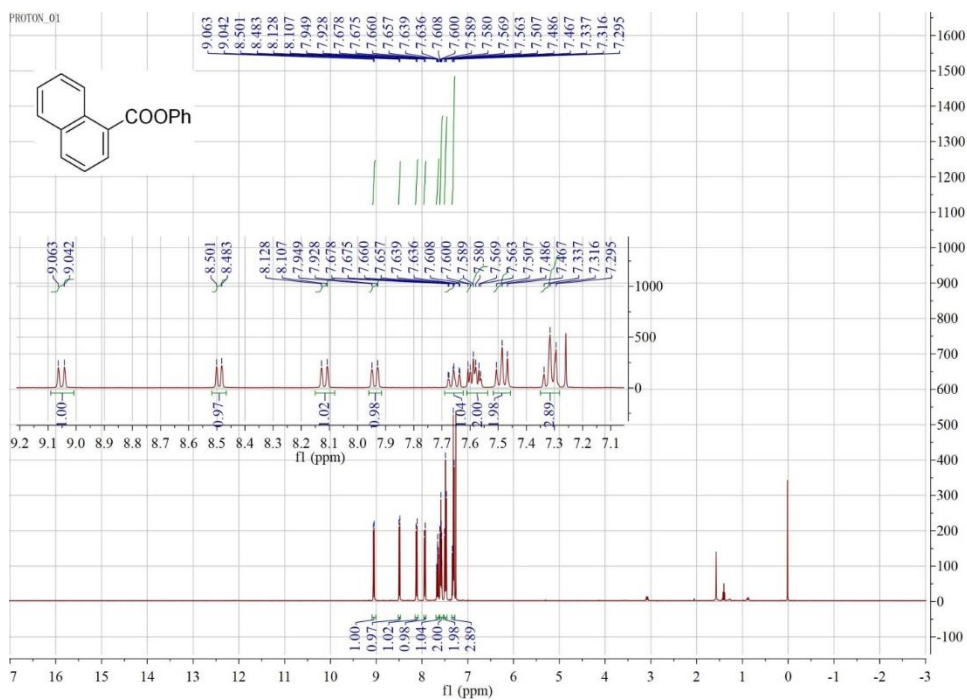

### <sup>13</sup>C NMR spectra of 4a:

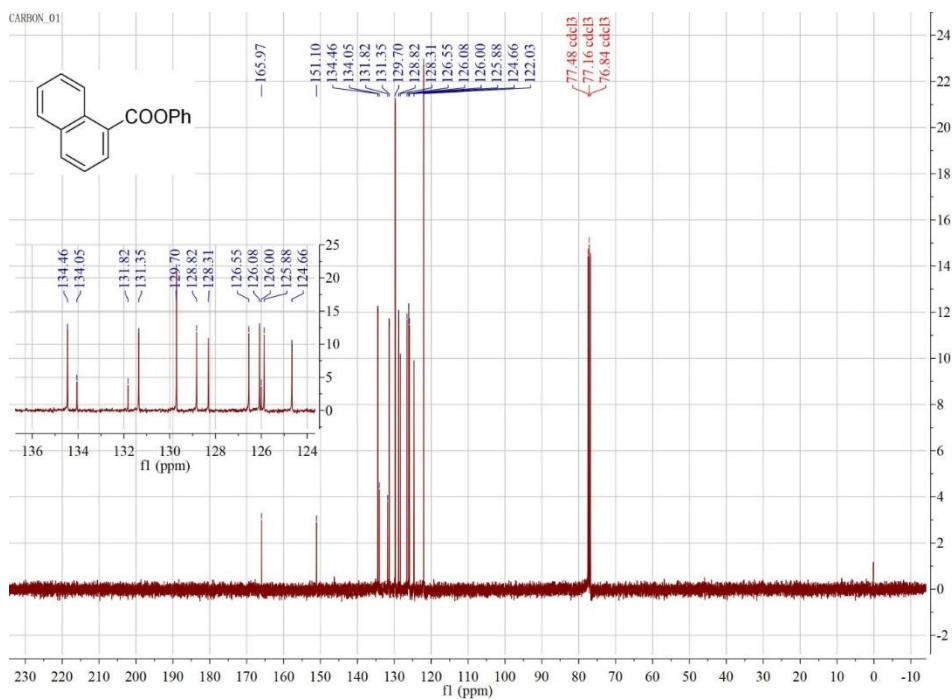

### <sup>1</sup>H NMR spectra of **4b**:

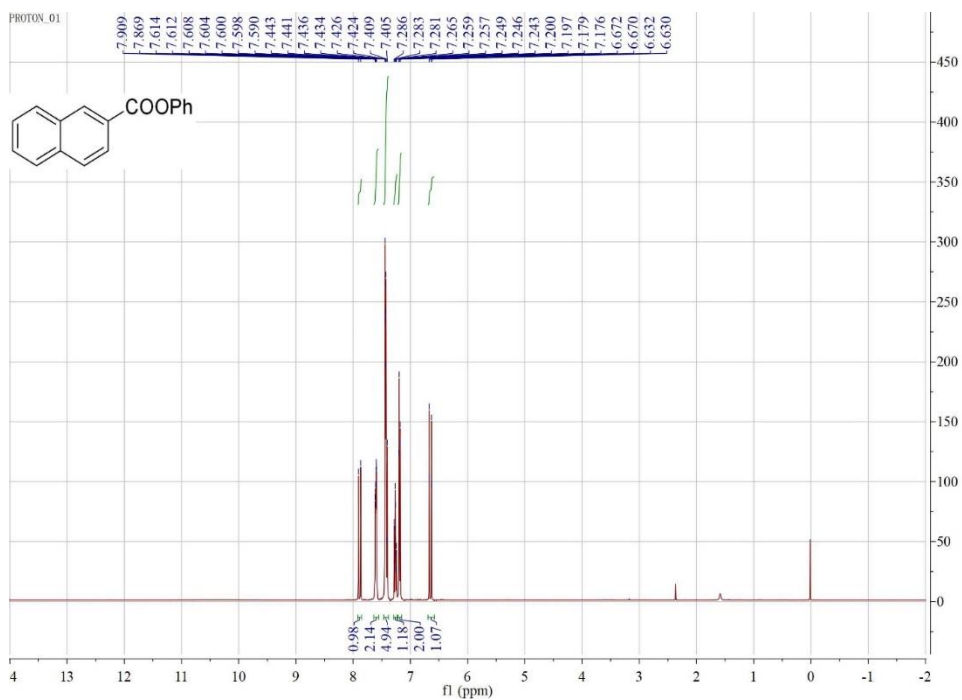

### <sup>13</sup>C NMR spectra of **4b**:

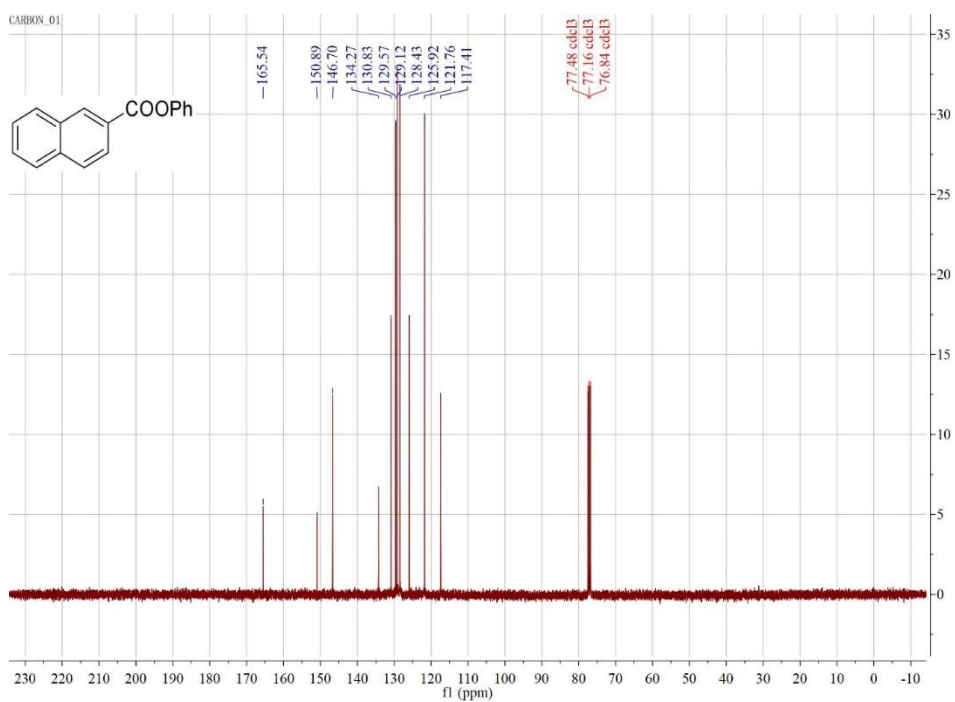

### <sup>1</sup>H NMR spectra of **4c**:

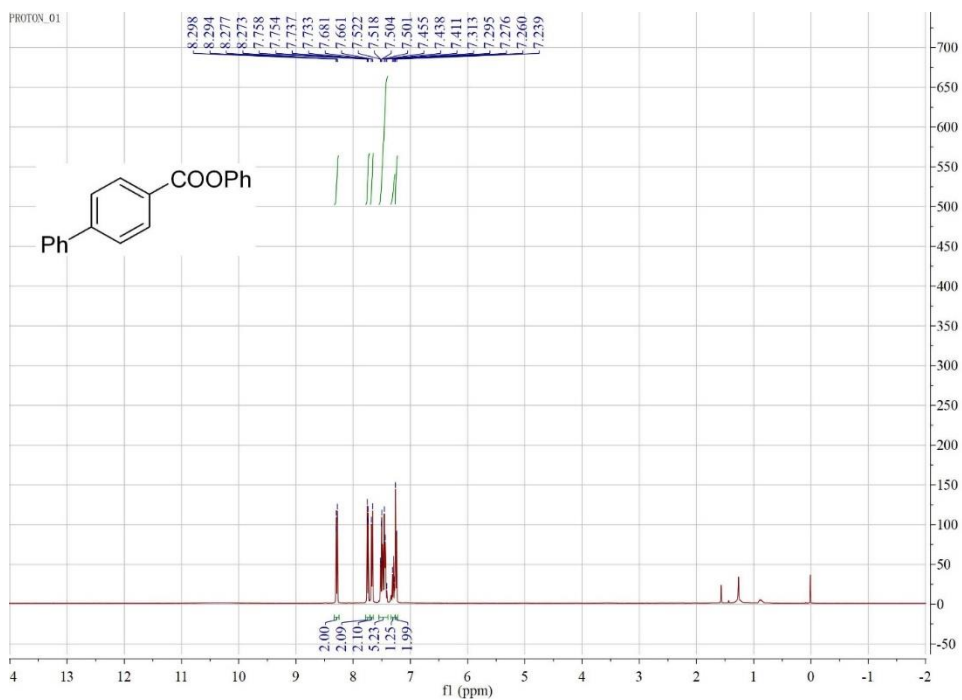

### <sup>13</sup>C NMR spectra of **4c**:

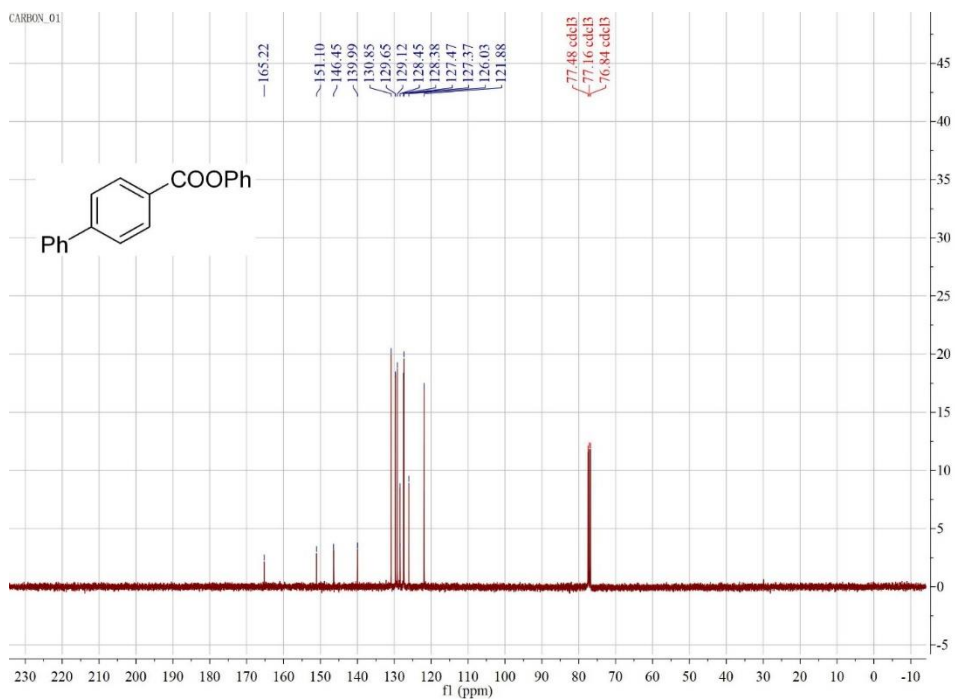

### <sup>1</sup>H NMR spectra of **4d**:

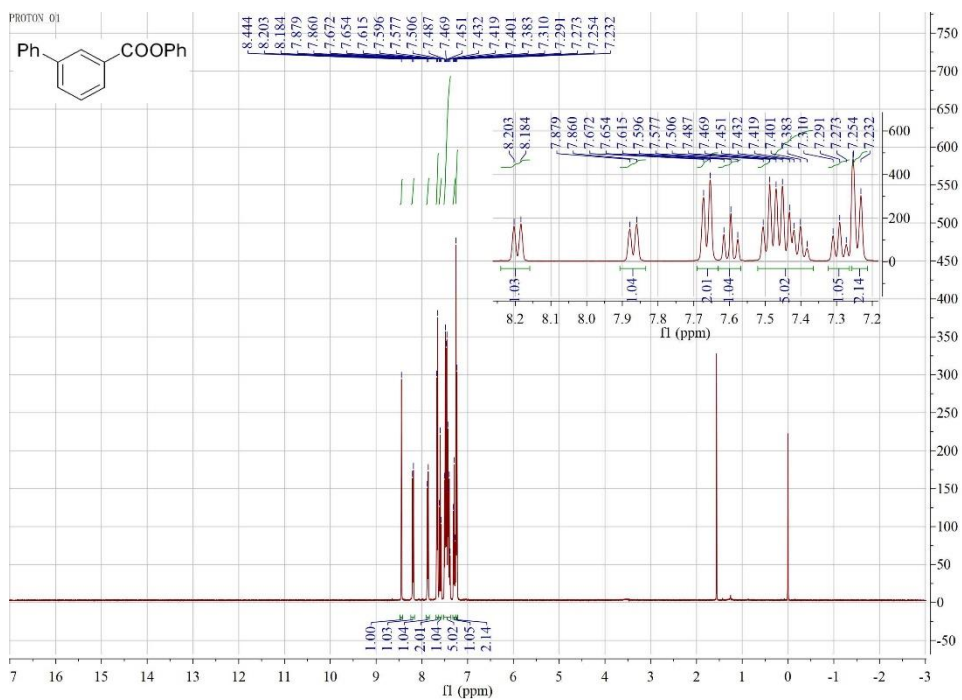

### <sup>13</sup>C NMR spectra of **4d**:

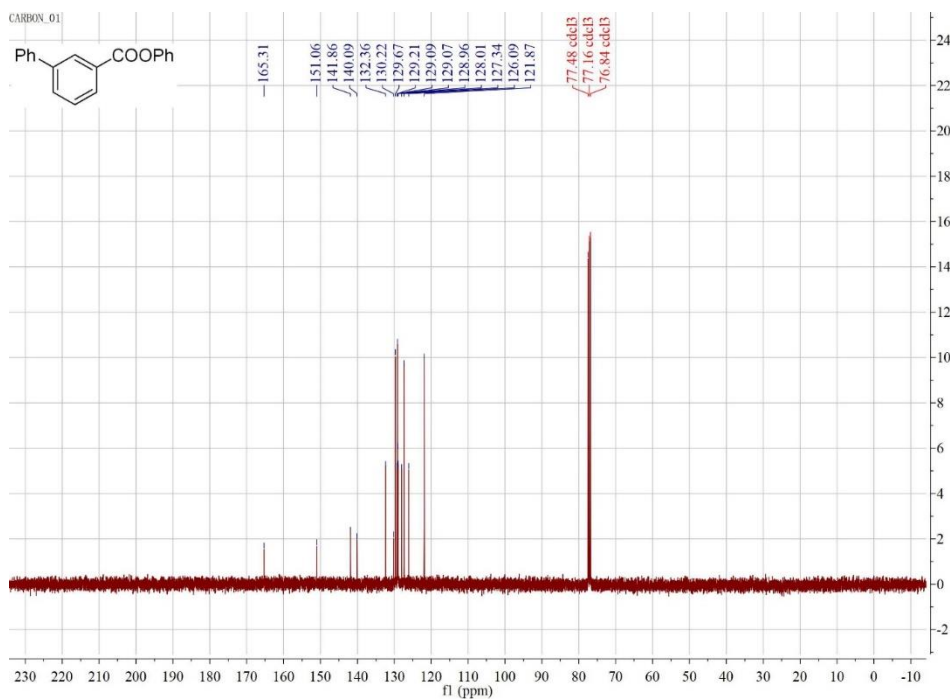

### <sup>1</sup>H NMR spectra of **4e**:

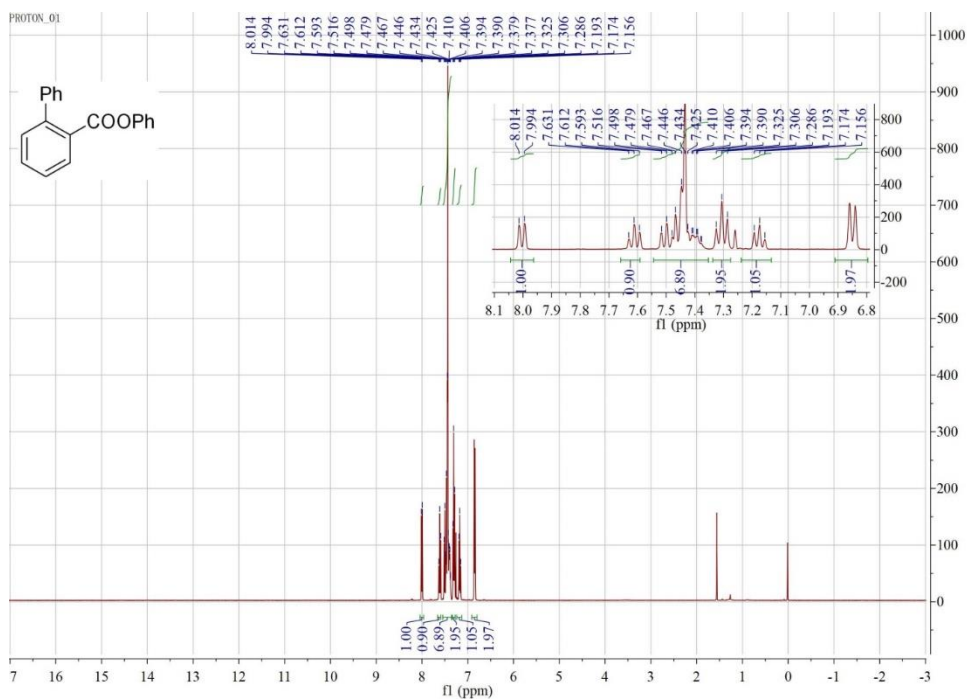

### <sup>13</sup>C NMR spectra of **4e**:

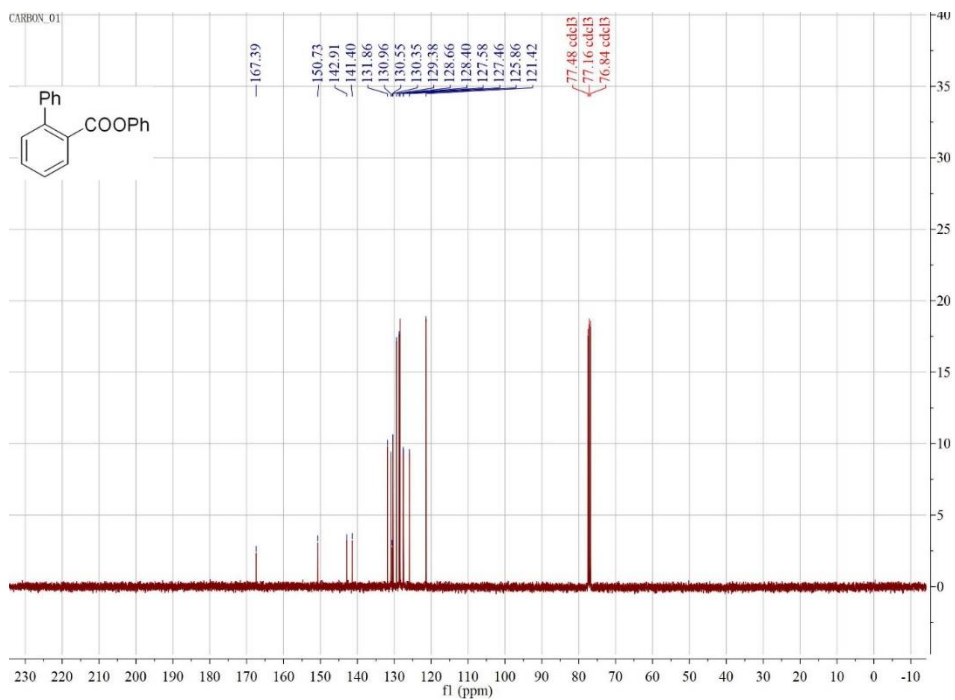

### <sup>1</sup>H NMR spectra of **4f**:

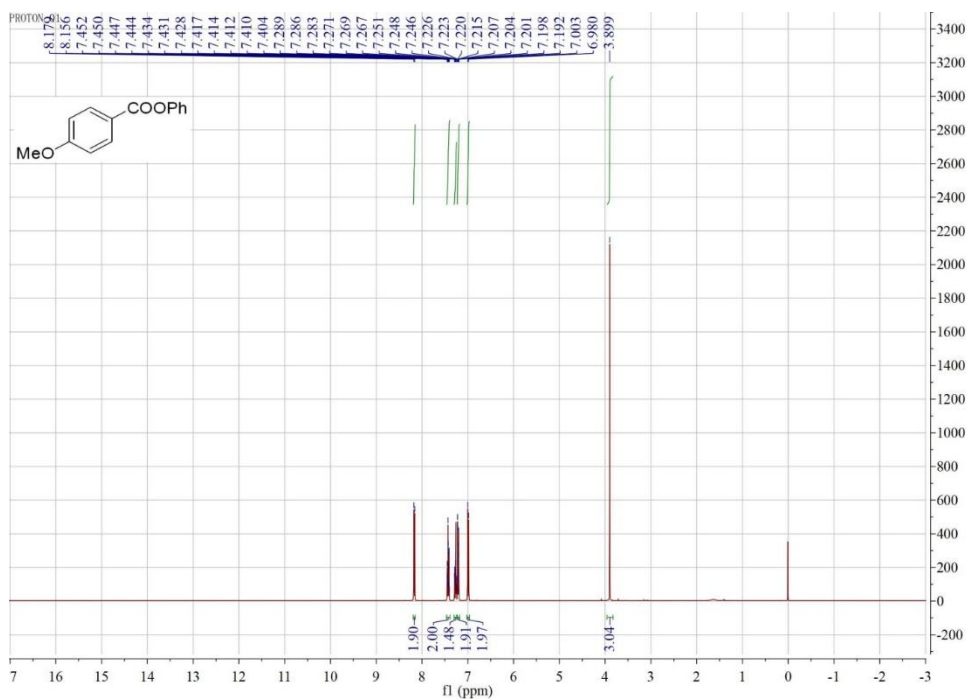

### <sup>13</sup>C NMR spectra of **4f**:

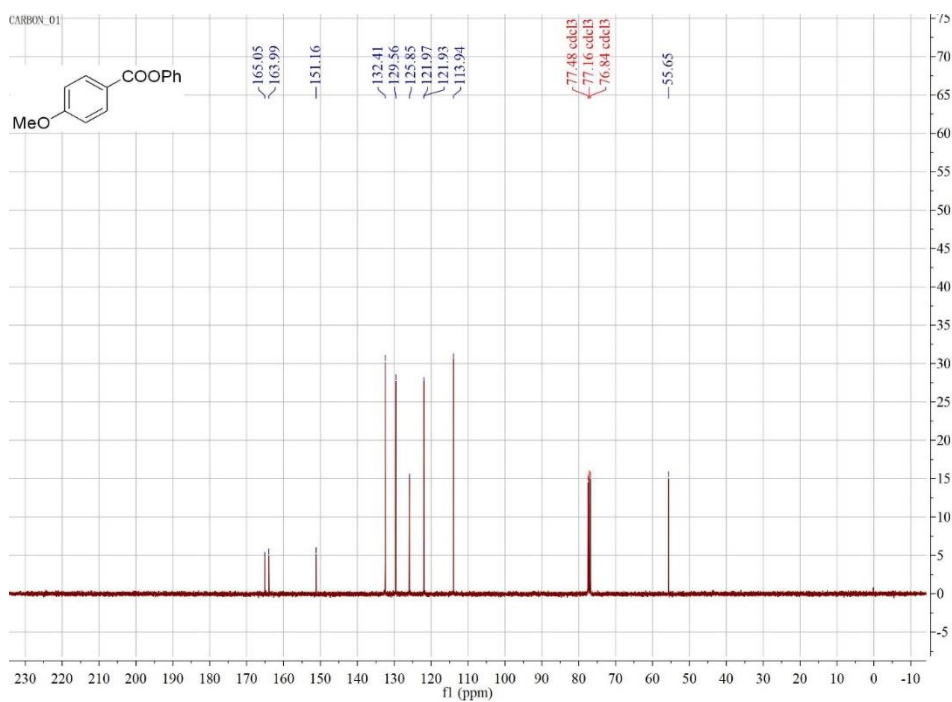



<sup>1</sup>H NMR spectra of **4g**:

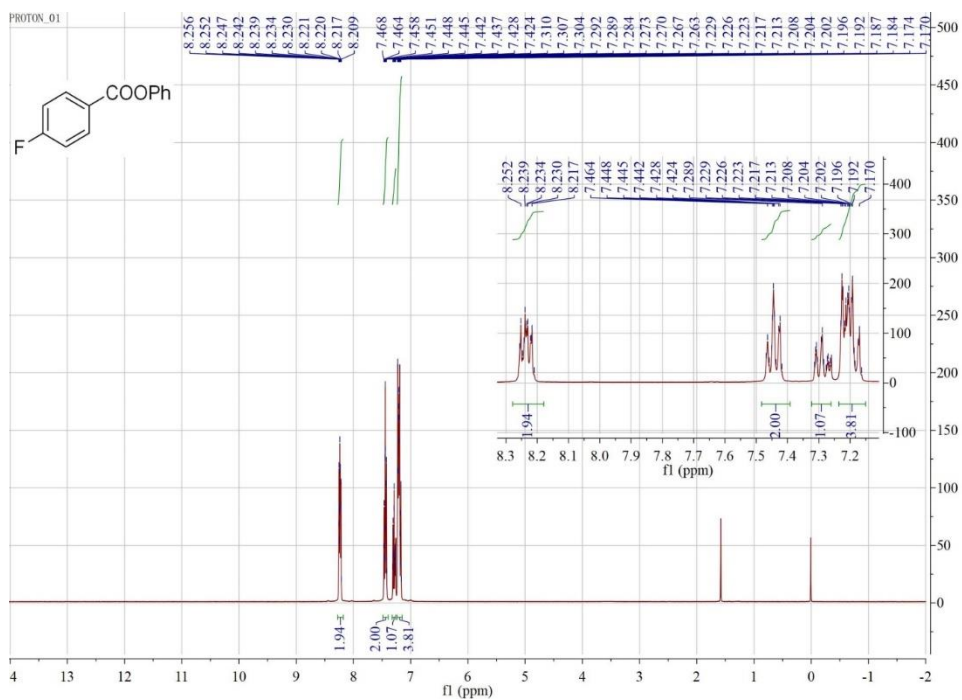

<sup>13</sup>C NMR spectra of **4g**:

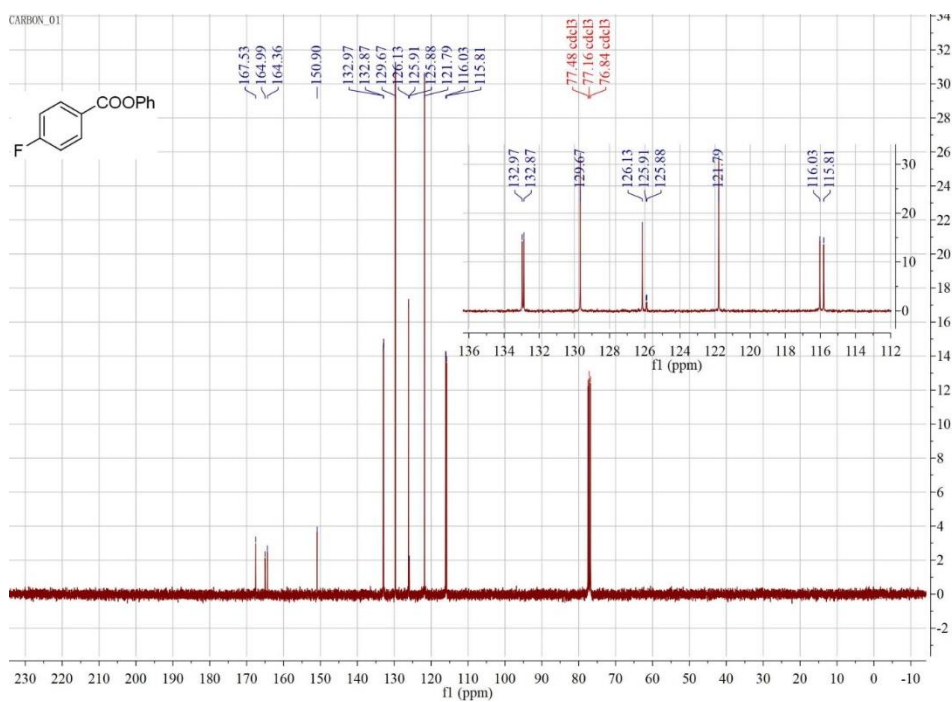

<sup>19</sup>F NMR spectra of **4g**:

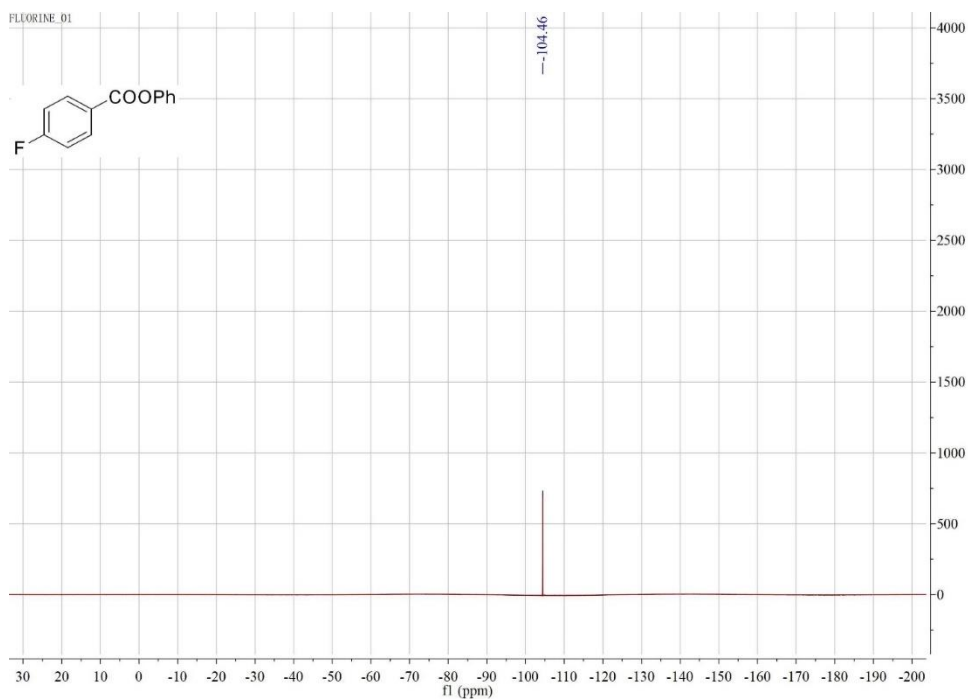

<sup>1</sup>H NMR spectra of **4h**:

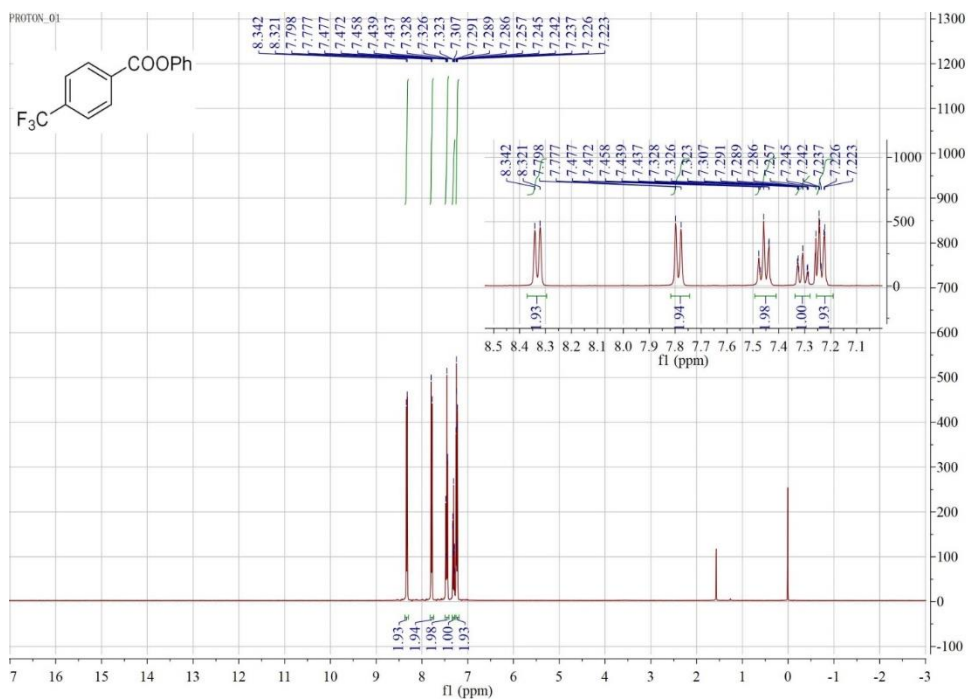

### <sup>13</sup>C NMR spectra of 4h:

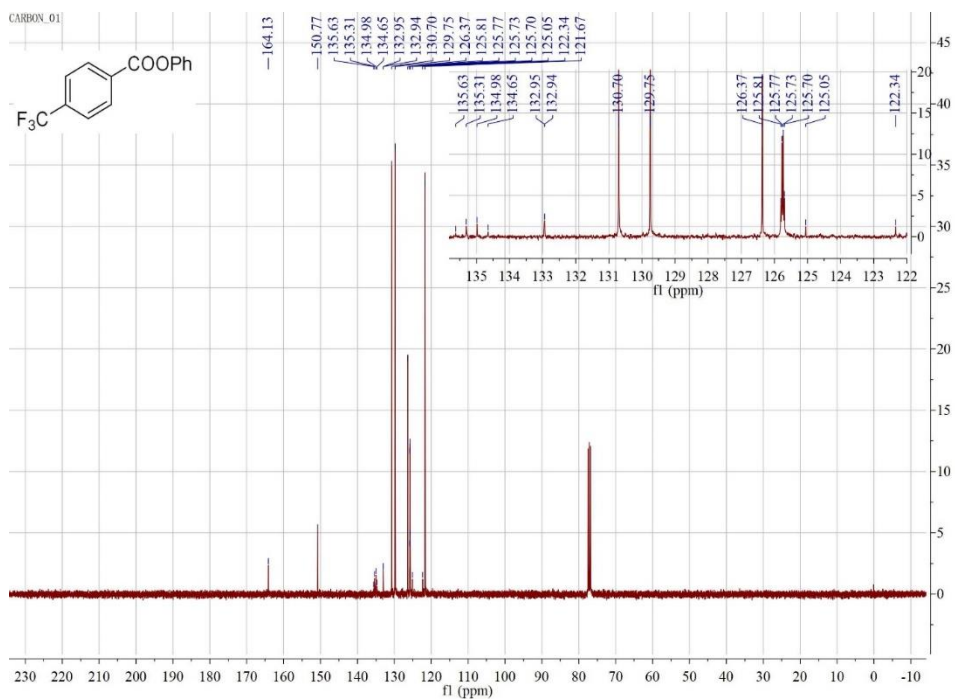

### <sup>19</sup>F NMR spectra of 4h:

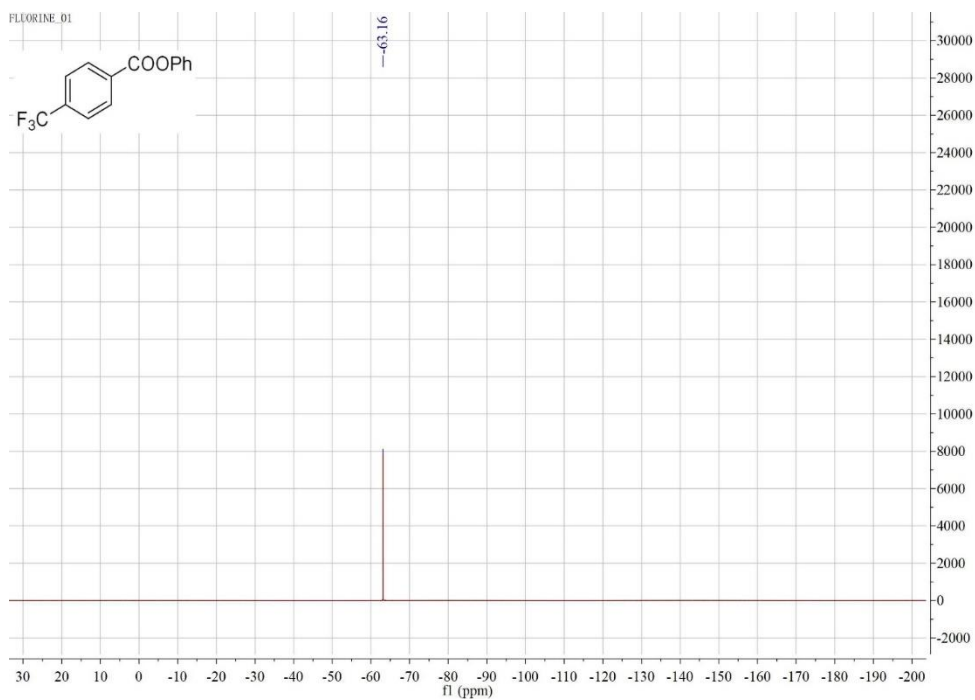

<sup>1</sup>H NMR spectra of **4q**:

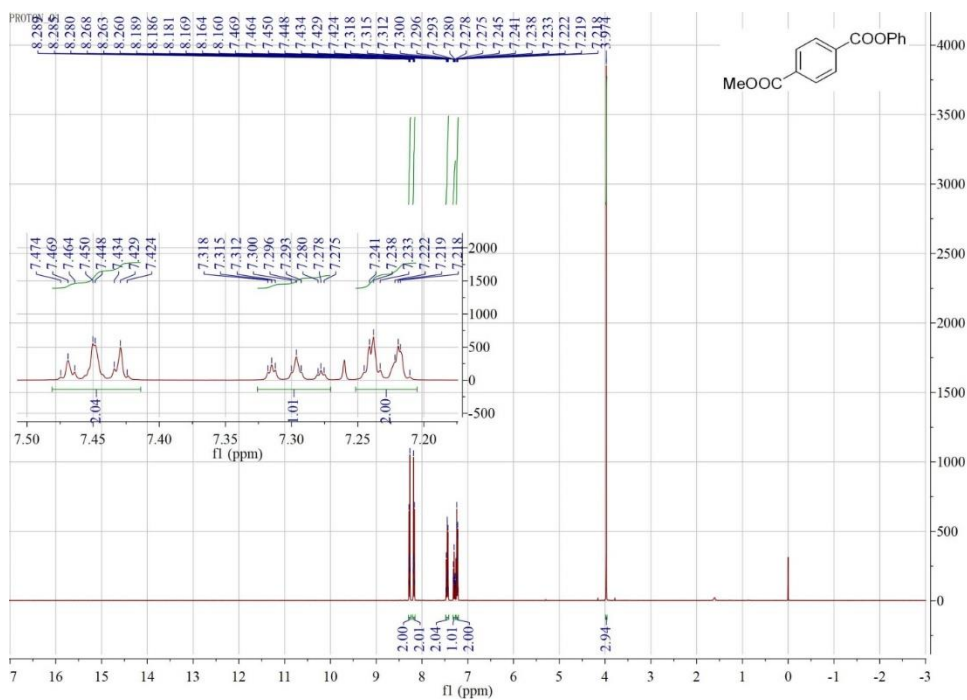

<sup>13</sup>C NMR spectra of **4q**:

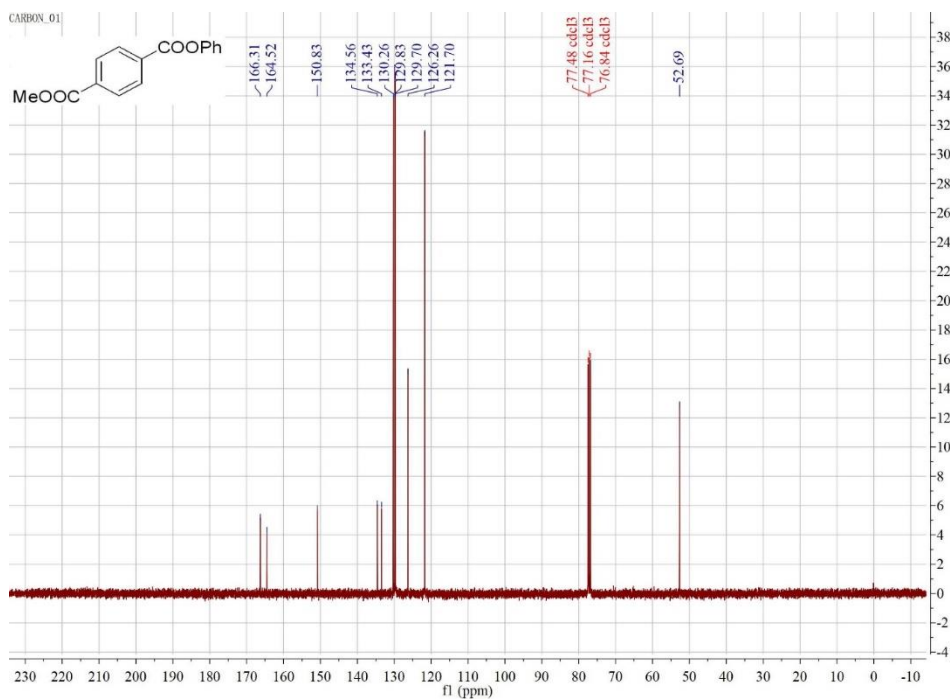

### <sup>1</sup>H NMR spectra of 4r:

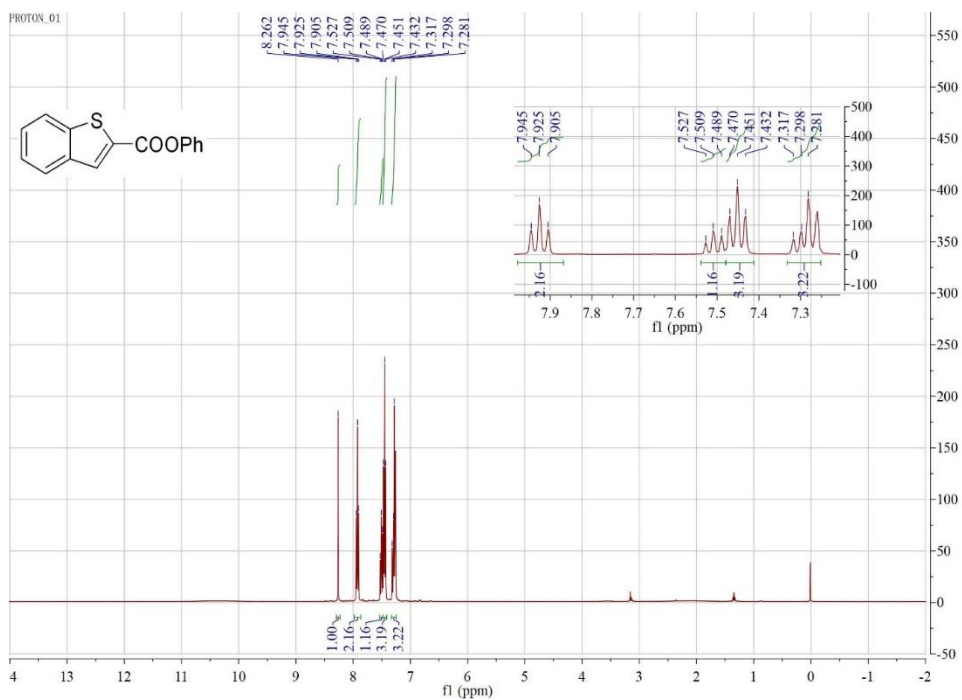

### <sup>13</sup>C NMR spectra of 4r:

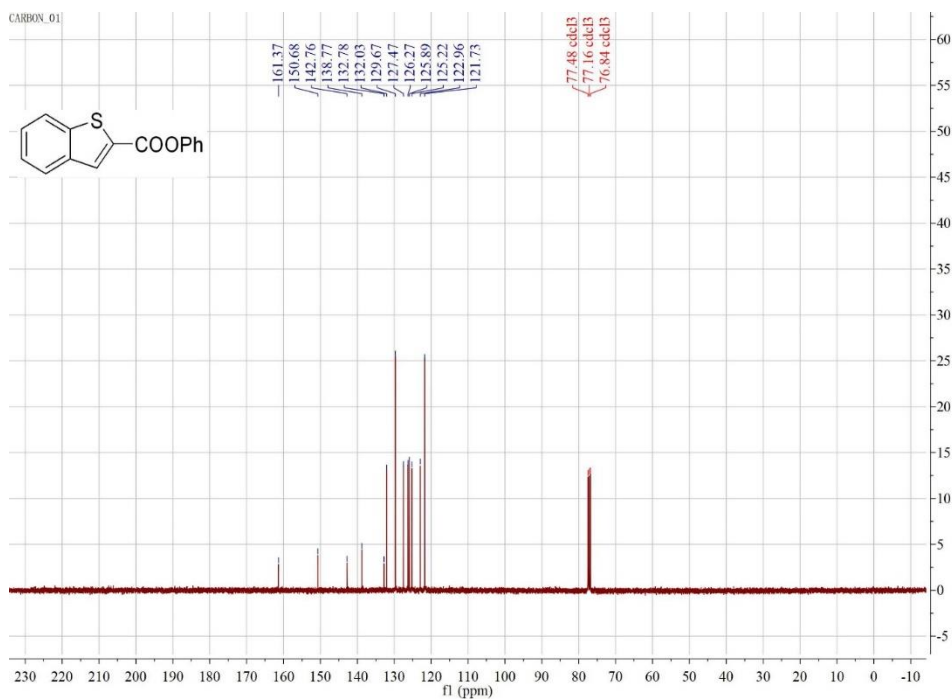

### <sup>1</sup>H NMR spectra of 4s:

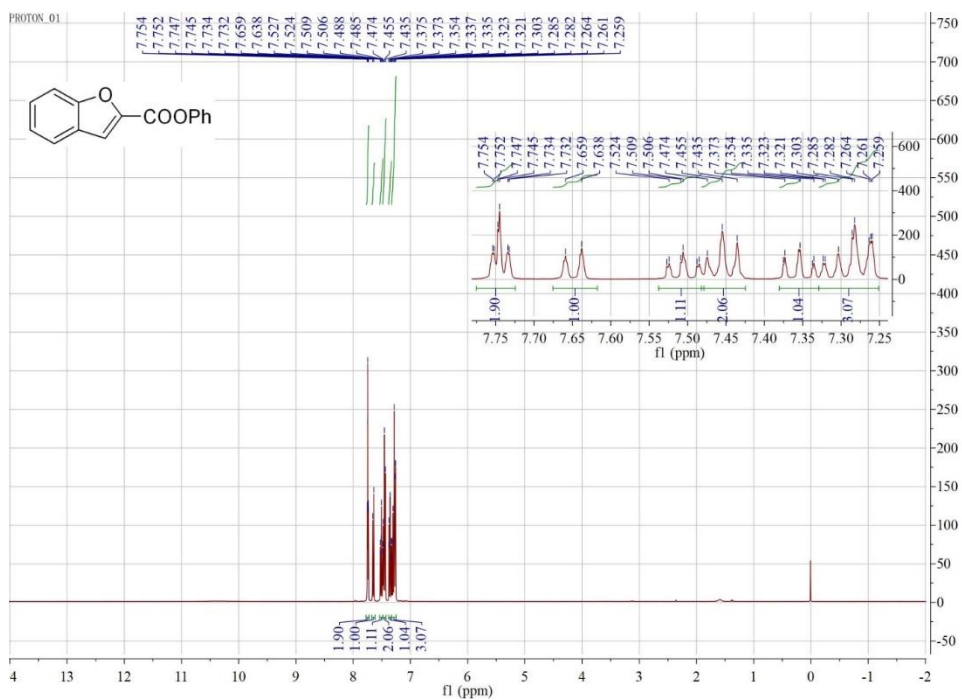

### <sup>13</sup>C NMR spectra of 4s:

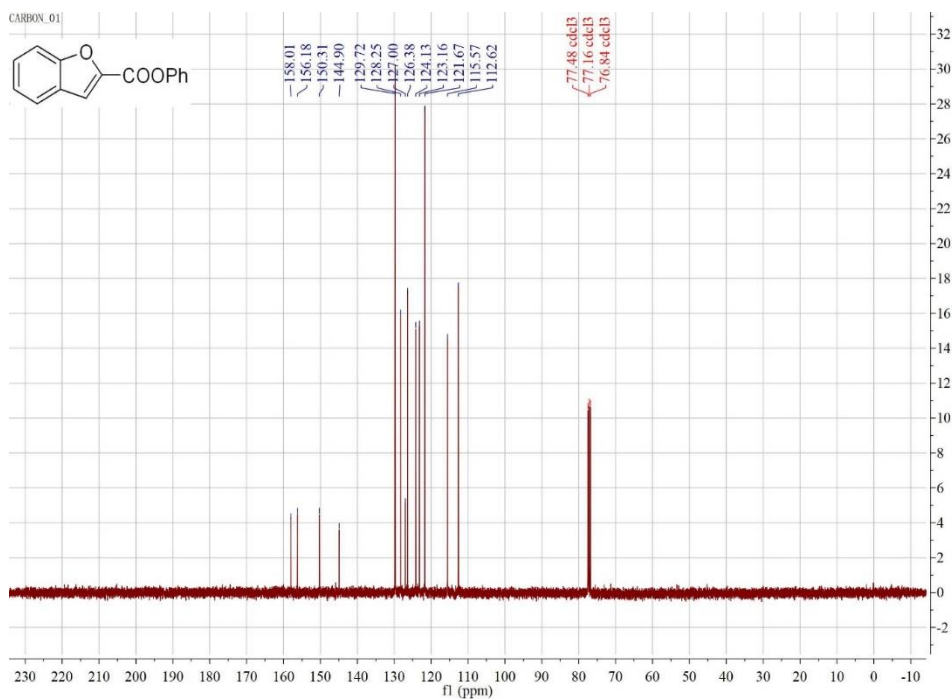

<sup>1</sup>H NMR spectra of **4t**:

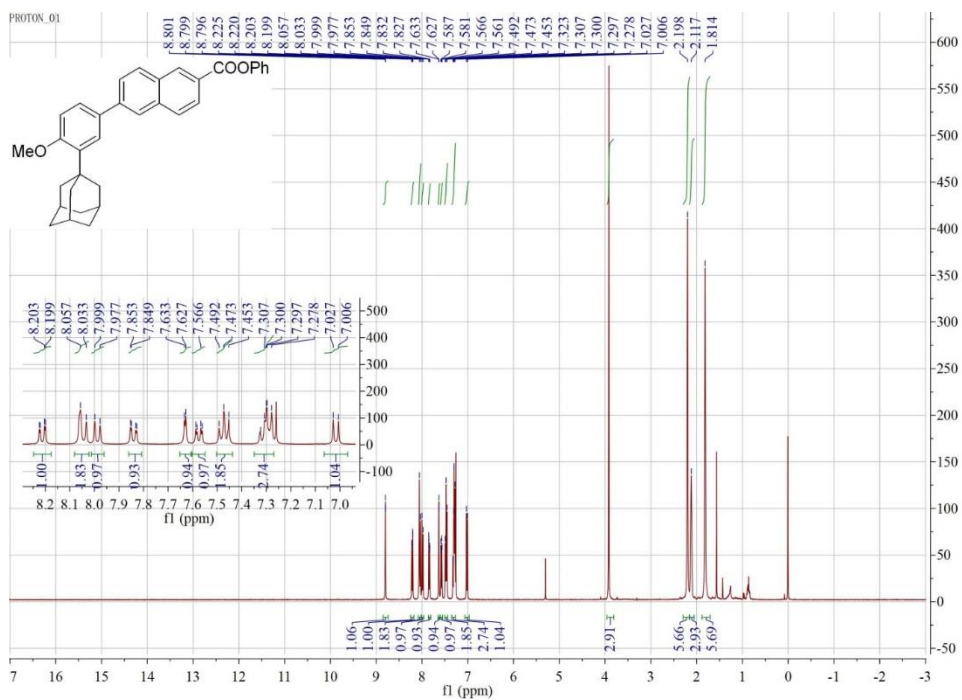

<sup>13</sup>C NMR spectra of **4t**:

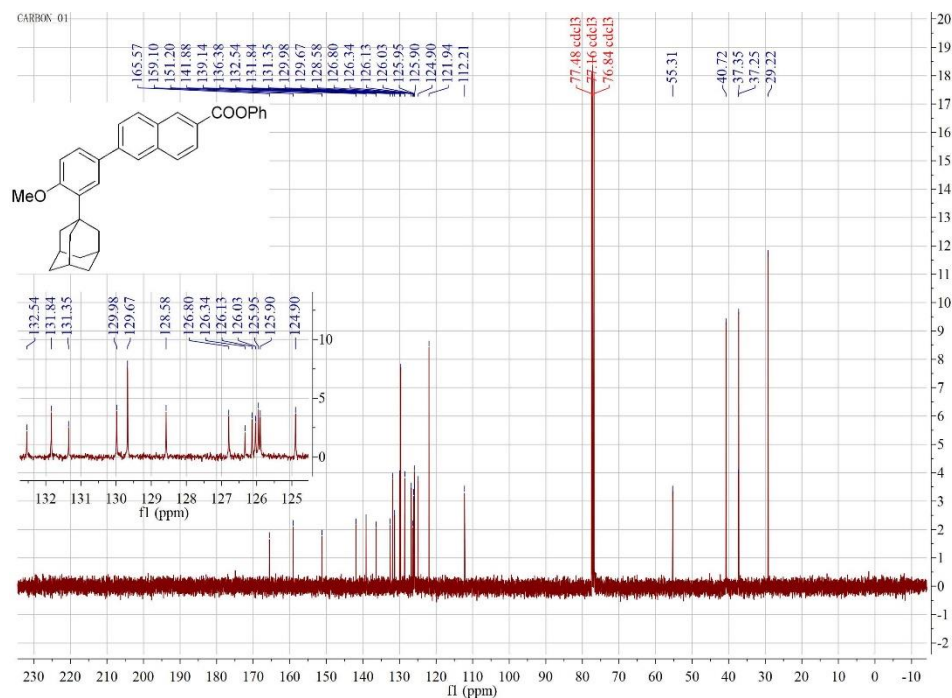



### <sup>1</sup>H NMR spectra of **9**:

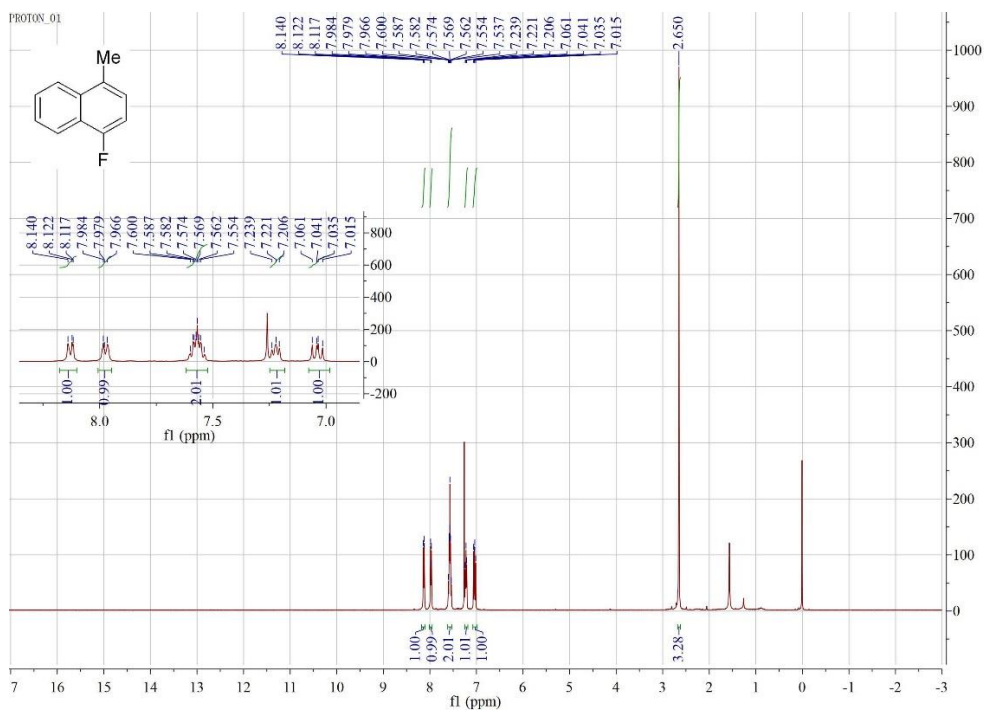

### <sup>13</sup>C NMR spectra of **9**:

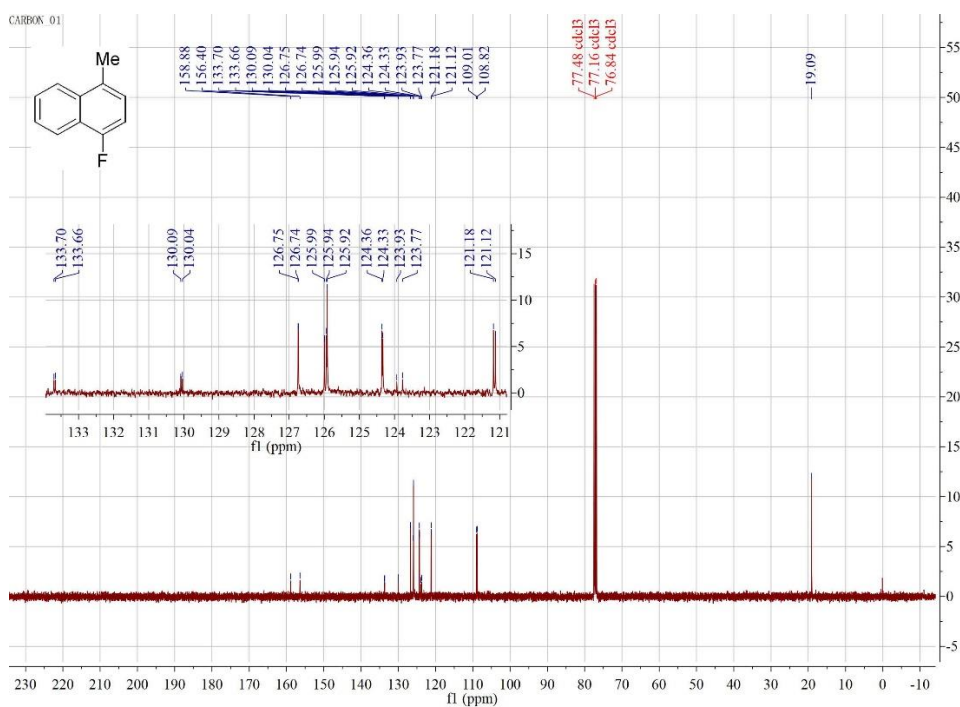



<sup>19</sup>F NMR spectra of **9**:

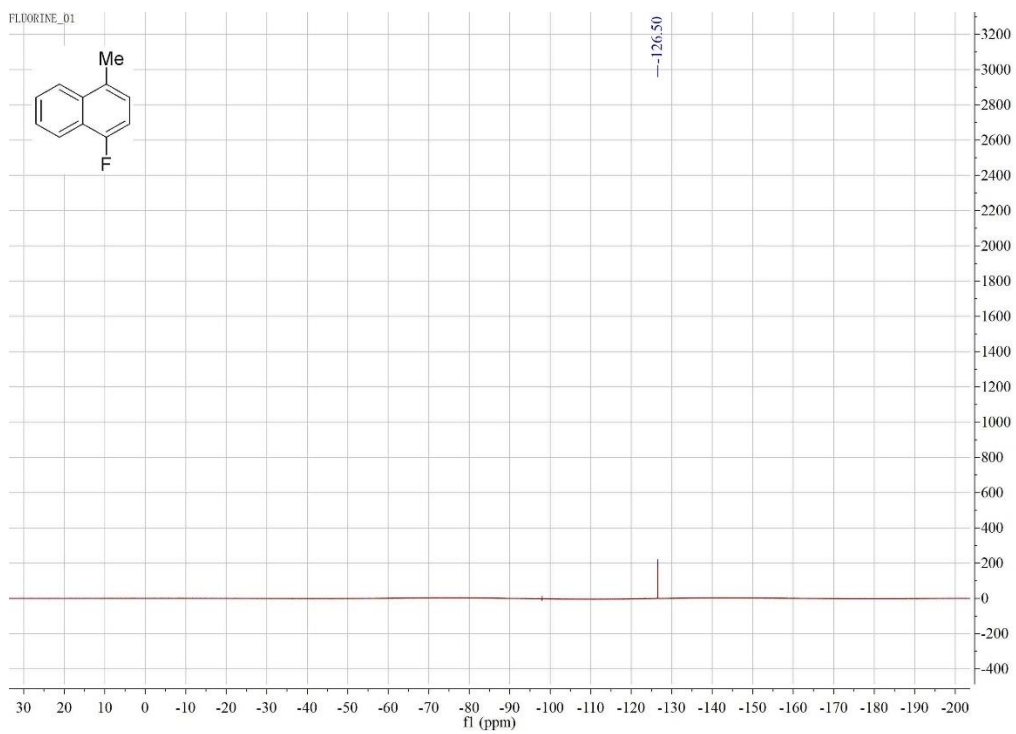

<sup>1</sup>H NMR spectra of **10**:

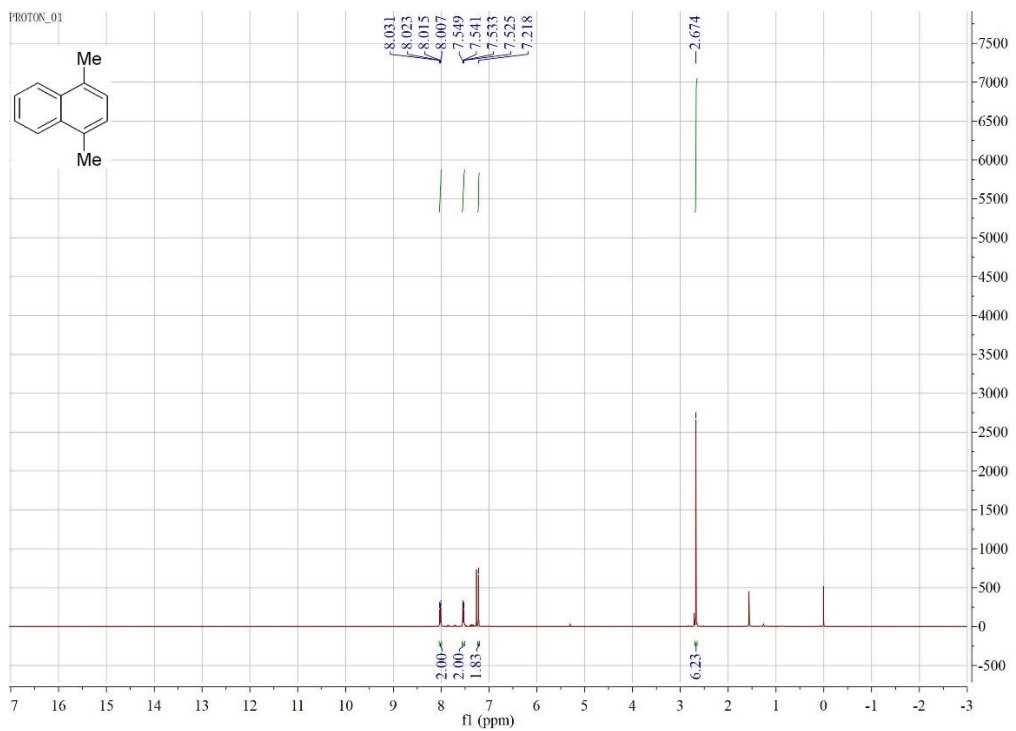

<sup>13</sup>C NMR spectra of **10**:

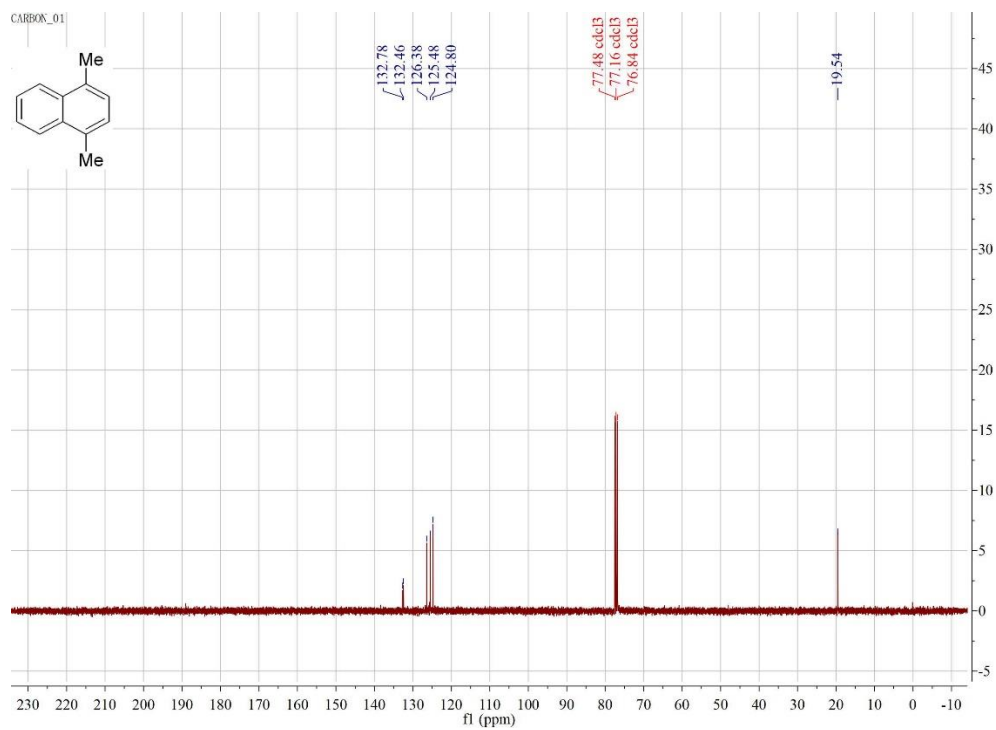

<sup>1</sup>H NMR spectra of **12**:

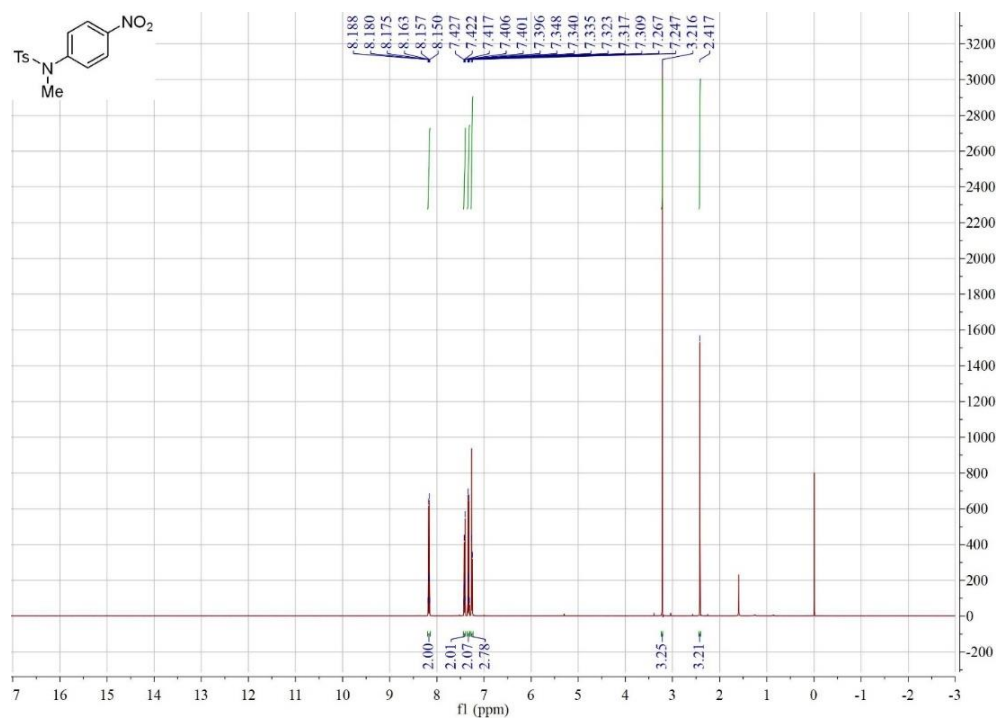

<sup>13</sup>C NMR spectra of **12**:

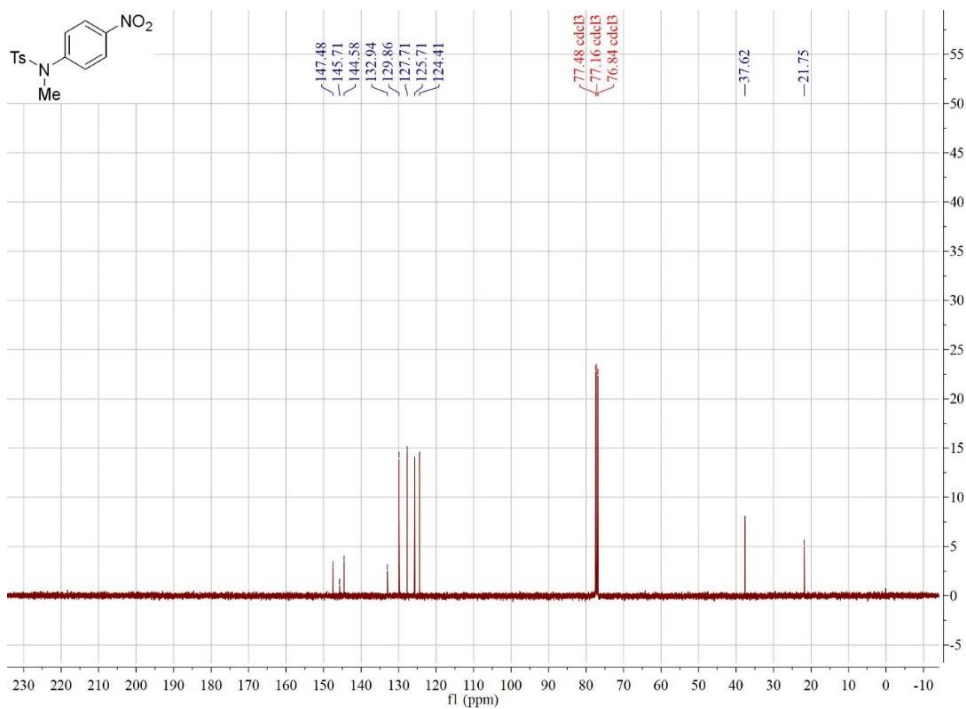

<sup>1</sup>H NMR spectra of **13**:

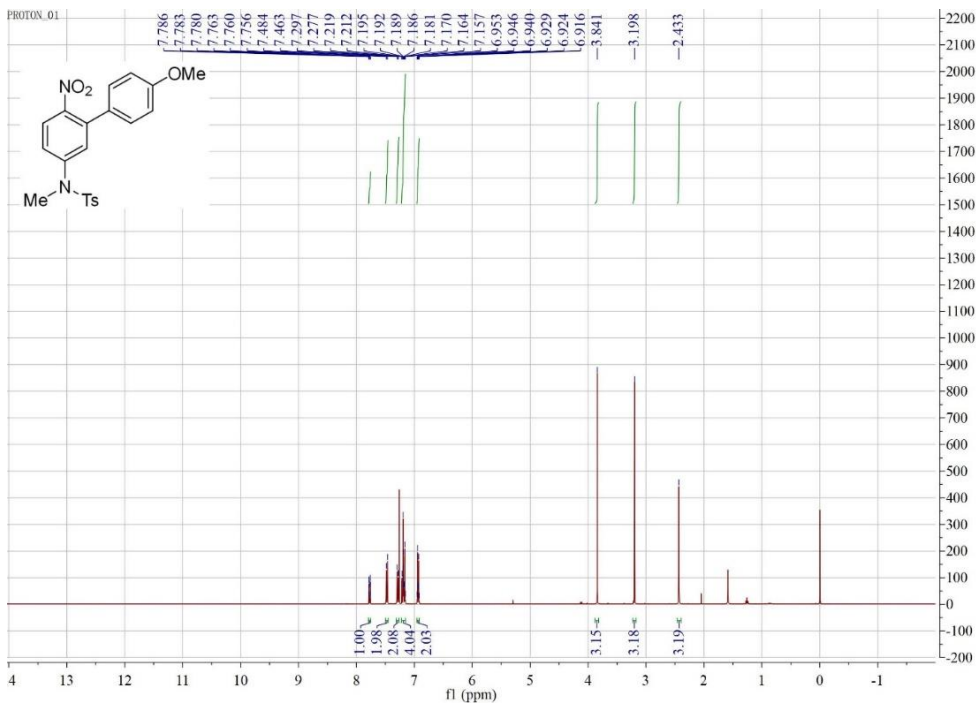

<sup>13</sup>C NMR spectra of **13**:

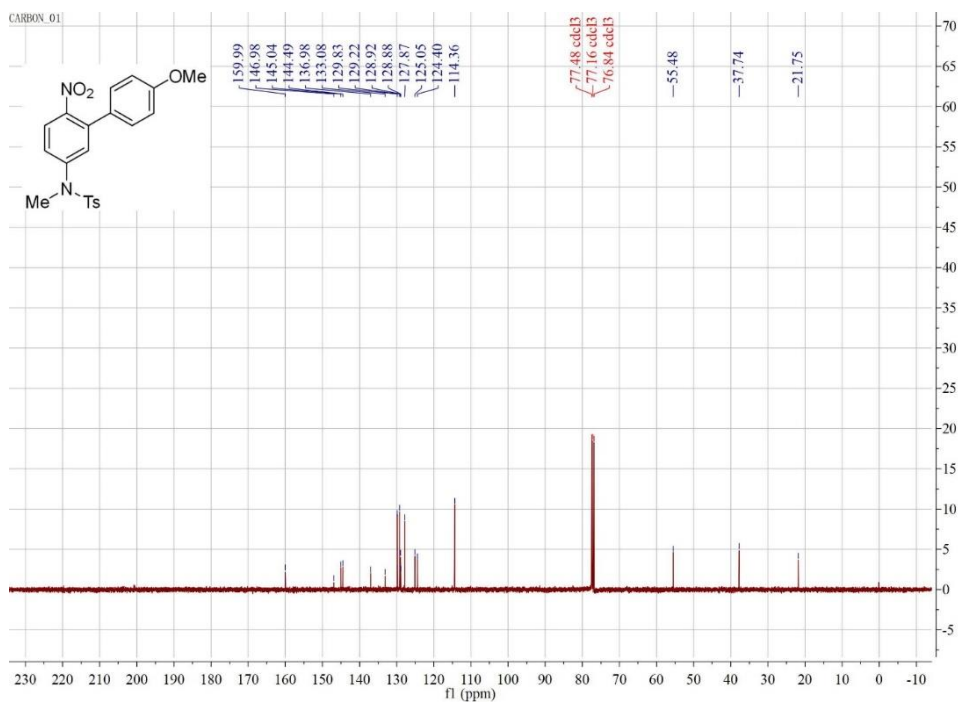

<sup>1</sup>H NMR spectra of **14**:

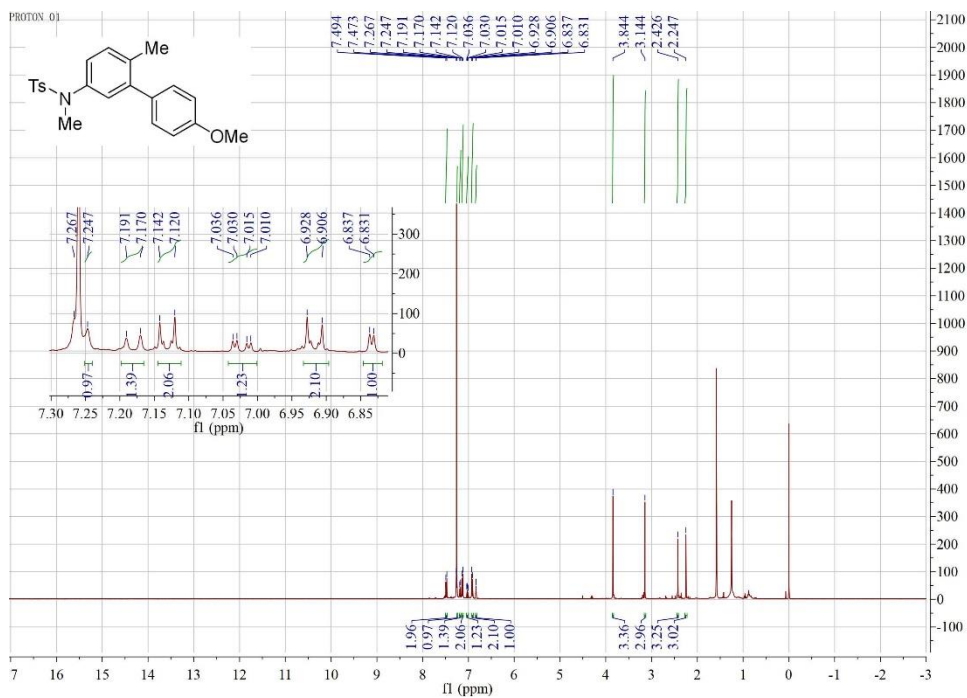

### <sup>13</sup>C NMR spectra of 14:

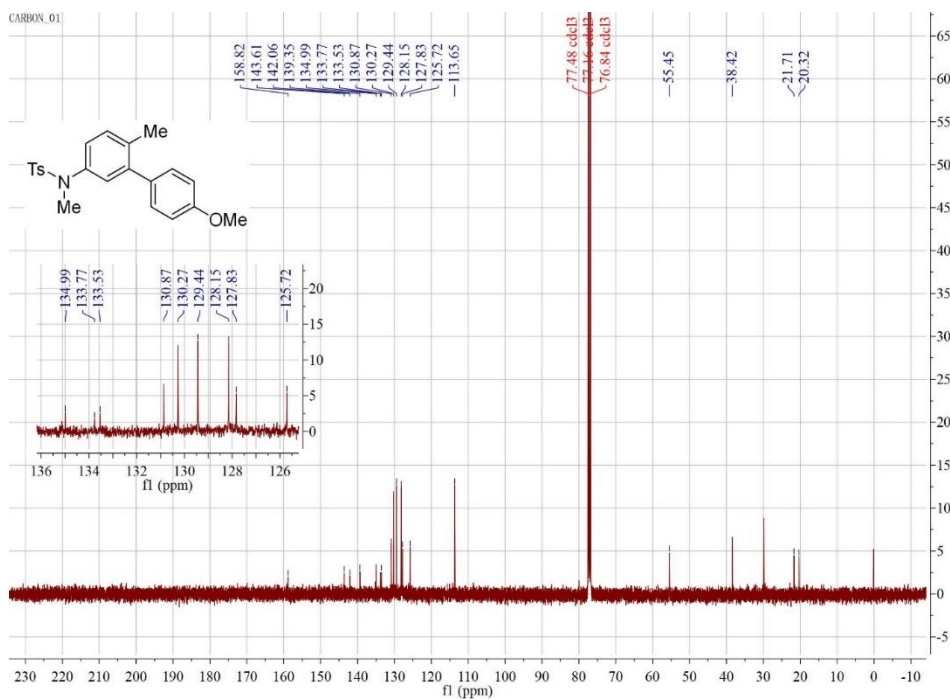

### <sup>1</sup>H NMR spectra of 15:

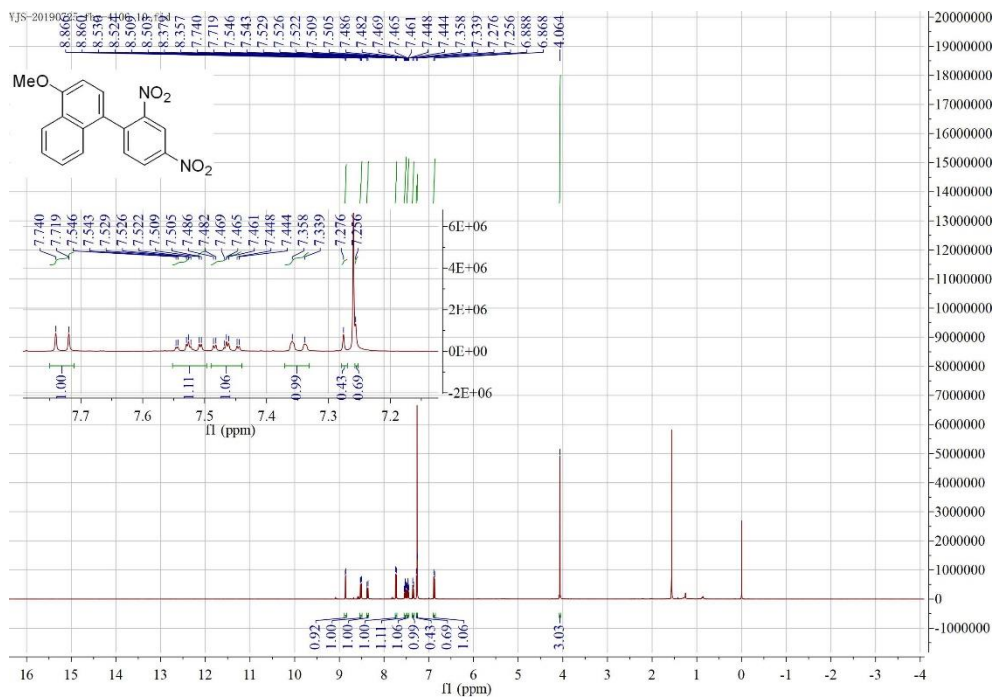

<sup>13</sup>C NMR spectra of **15**:

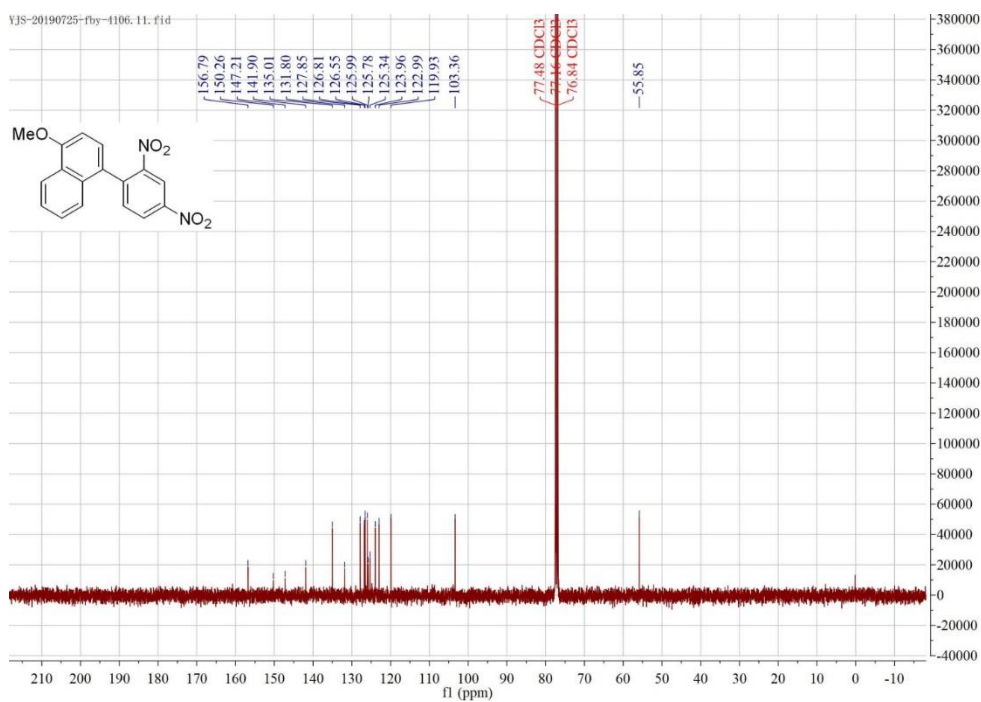

<sup>1</sup>H NMR spectra of **16**:

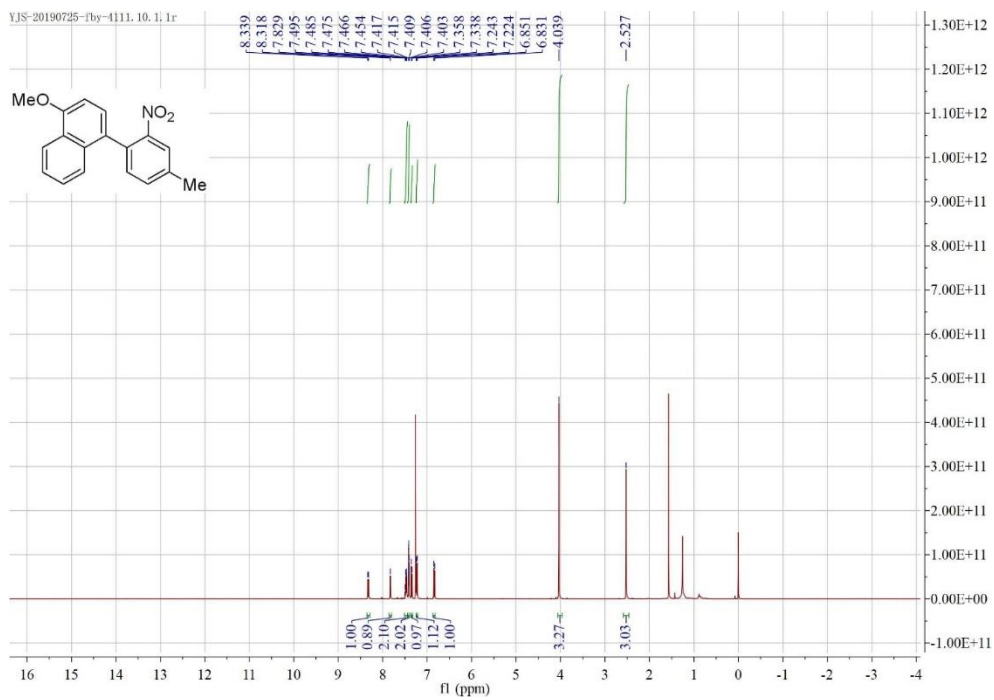

<sup>13</sup>C NMR spectra of **16**:

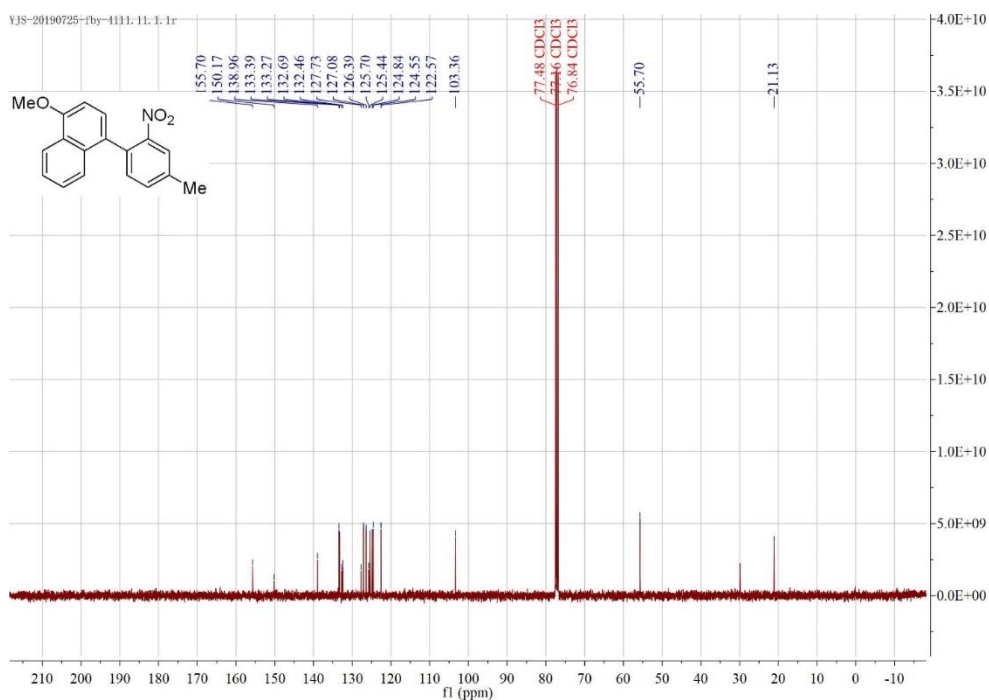

<sup>1</sup>H NMR spectra of **17**:

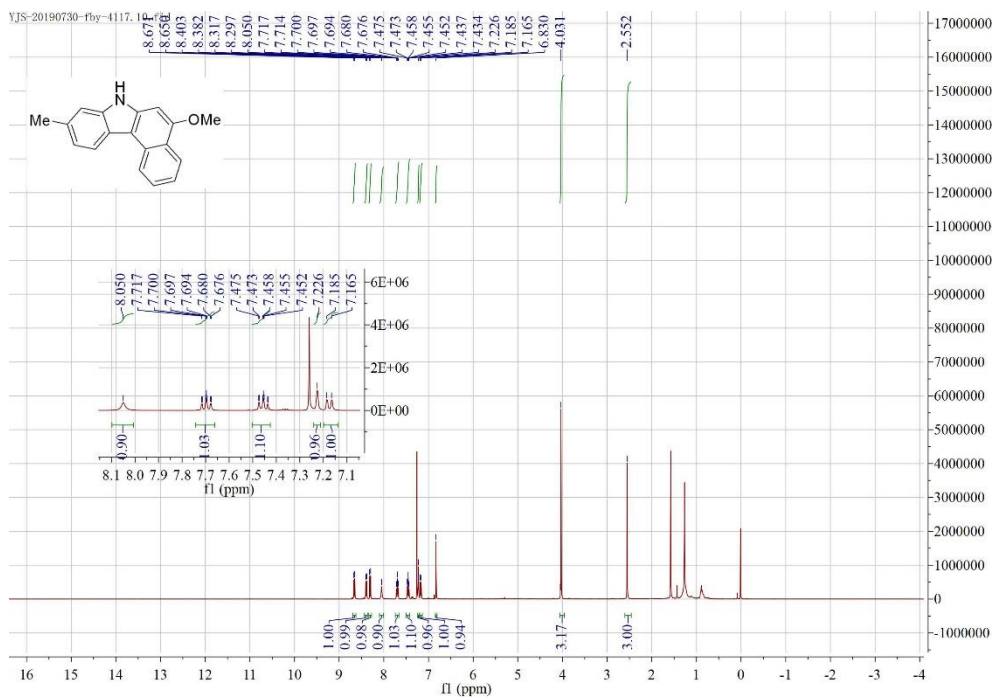

<sup>13</sup>C NMR spectra of **17**:

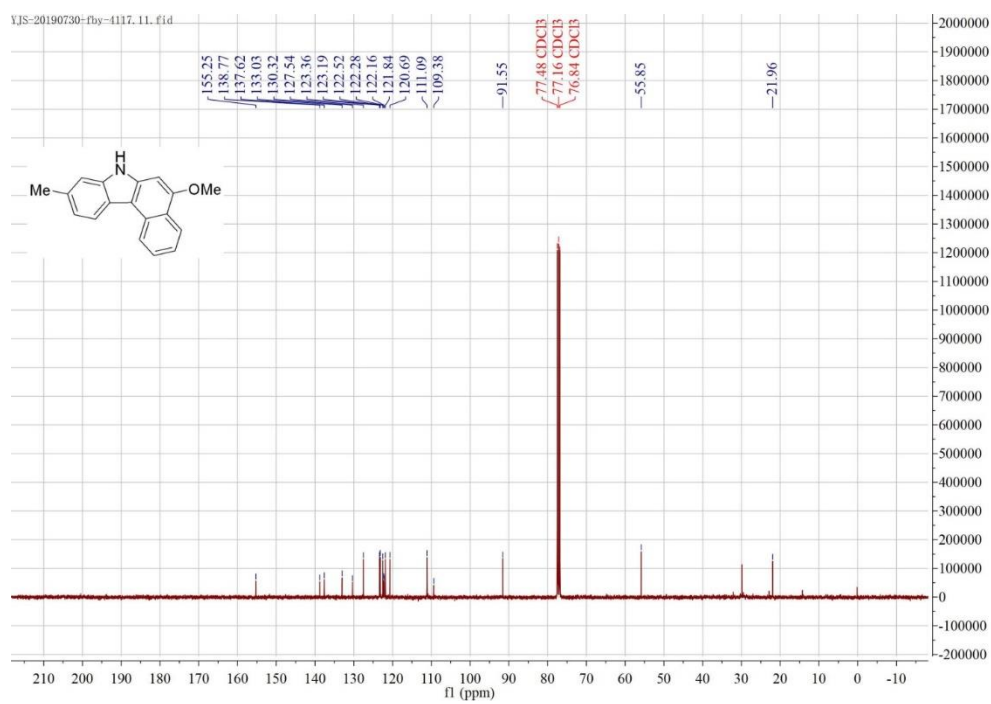

Supplement: d0sc01641a1.pdf [file d0sc01641a1.pdf]
